# Supplementary material for: Egr2 induction in spiny projection neurons of the ventrolateral striatum contributes to cocaine place preference in mice
Source: eLife. 2021 Mar 16;10:e65228. doi: 10.7554/eLife.65228 (PMC8057818; doi:10.7554/eLife.65228)
Supplement: Supplementary file 1. [file elife-65228-supp1.xlsx]

## Sheet: all_samples_table
Supplementary Table S1: Distribution of sequencing libraries analysed in this study
Sample_ID	Experiment	Structure	Treatment	Library size (million usable reads)	Analysis
exp20_STR_1_S8_R2_001;run0090	Acute	STR	0h	2.95025	inducible,
exp20_STR_2_S7_R2_001;run0090	Acute	STR	0h	1.44158	inducible,
exp20_STR_3_S6_R2_001;run0090	Acute	STR	0h	3.2135	inducible,
exp20_STR_4_S5_R2_001;run0090	Acute	STR	0h	3.6714	inducible,
exp20-STR-3_S41_R2_001;run0194	Acute	STR	0h	2.15774	baseline
exp20-STR-4_S42_R2_001;run0194	Acute	STR	0h	2.2666	baseline
exp20_STR_5_S4_R2_001;run0090	Acute	STR	1h	4.10318	inducible,
exp20_STR_6_S3_R2_001;run0090	Acute	STR	1h	3.66832	inducible,
exp20_STR_7_S2_R2_001;run0090	Acute	STR	1h	3.5565	inducible,
exp20_STR_8_S1_R2_001;run0090	Acute	STR	1h	3.29008	inducible,
exp20-STR-7_S43_R2_001;run0194	Acute	STR	1h	2.09679	baseline
exp20-STR-8_S44_R2_001;run0194	Acute	STR	1h	2.36744	baseline
exp20_STR_10_S10_R2_001;run0090	Acute	STR	2h	3.07973	inducible,
exp20_STR_11_S11_R2_001;run0090	Acute	STR	2h	5.52428	inducible,
exp20_STR_12_S12_R2_001;run0090	Acute	STR	2h	2.7335	inducible,
exp20_STR_9_S9_R2_001;run0090	Acute	STR	2h	4.41631	inducible,
exp20-STR-10_S46_R2_001;run0194	Acute	STR	2h	2.3103	baseline
exp20-STR-9_S45_R2_001;run0194	Acute	STR	2h	2.4229	baseline
exp20_STR_13_S13_R2_001;run0090	Acute	STR	4h	3.6327	inducible,
exp20_STR_14_S14_R2_001;run0090	Acute	STR	4h	3.8755	inducible,
exp20_STR_15_S15_R2_001;run0090	Acute	STR	4h	3.70196	inducible,
exp20_STR_16_S16_R2_001;run0090	Acute	STR	4h	4.96305	inducible,
exp20-STR-13_S47_R2_001;run0194	Acute	STR	4h	2.70469	baseline
exp20-STR-14_S48_R2_001;run0194	Acute	STR	4h	2.44598	baseline
STR-1_S1_R2_001;run0230	Challenge	STR	0h	4.64967	inducible,
STR-2_S2_R2_001;run0230	Challenge	STR	0h	4.30844	inducible,
STR-3_S3_R2_001;run0230	Challenge	STR	0h	3.94012	inducible,
STR-1_S25_R2_001;run0194	Challenge	STR	0h	1.52884	baseline
STR-3_S26_R2_001;run0194	Challenge	STR	0h	1.29948	baseline
STR-4_S4_R2_001;run0230	Challenge	STR	1h	3.75827	inducible,
STR-5_S5_R2_001;run0230	Challenge	STR	1h	3.40199	inducible,
STR-6_S6_R2_001;run0230	Challenge	STR	1h	4.10881	inducible,
STR-7_S7_R2_001;run0230	Challenge	STR	1h	3.67522	inducible,
STR-5_S27_R2_001;run0194	Challenge	STR	1h	1.40402	baseline
STR-7_S28_R2_001;run0194	Challenge	STR	1h	1.62276	baseline
STR-10_S10_R2_001;run0230	Challenge	STR	2h	3.06957	inducible,
STR-11_S11_R2_001;run0230	Challenge	STR	2h	4.63419	inducible,
STR-8_S8_R2_001;run0230	Challenge	STR	2h	3.58216	inducible,
STR-9_S9_R2_001;run0230	Challenge	STR	2h	4.24183	inducible,
STR-10_S29_R2_001;run0194	Challenge	STR	2h	1.26939	baseline
STR-11_S30_R2_001;run0194	Challenge	STR	2h	1.52724	baseline
STR-12_S12_R2_001;run0230	Challenge	STR	4h	2.93008	inducible,
STR-13_S13_R2_001;run0230	Challenge	STR	4h	3.78815	inducible,
STR-14_S14_R2_001;run0230	Challenge	STR	4h	4.37005	inducible,
STR-15_S15_R2_001;run0230	Challenge	STR	4h	10.3678	inducible,
STR-14_S31_R2_001;run0194	Challenge	STR	4h	1.40946	baseline
STR-15_S32_R2_001;run0194	Challenge	STR	4h	1.80591	baseline
exp16_str_1_S17_R2_001;run0230	Repeated	STR	0h	3.22779	inducible,
exp16_str_4_S18_R2_001;run0230	Repeated	STR	0h	3.06667	inducible,
exp17_str_1_S25_R2_001;run0230	Repeated	STR	0h	3.09129	inducible,
exp17_str_2_S26_R2_001;run0230	Repeated	STR	0h	3.4234	inducible,
exp17_STR_1_S17_R2_001;run0194	Repeated	STR	0h	1.74034	baseline
exp17_STR_2_S18_R2_001;run0194	Repeated	STR	0h	1.89516	baseline
exp16_str_5_S19_R2_001;run0230	Repeated	STR	1h	3.56414	inducible,
exp16_str_7_S20_R2_001;run0230	Repeated	STR	1h	3.00743	inducible,
exp17_str_4_S27_R2_001;run0230	Repeated	STR	1h	3.46634	inducible,
exp17_str_5_S28_R2_001;run0230	Repeated	STR	1h	3.16439	inducible,
exp17_STR_4_S19_R2_001;run0194	Repeated	STR	1h	1.6938	baseline
exp17_STR_5_S20_R2_001;run0194	Repeated	STR	1h	1.68986	baseline
exp16_str_11_S22_R2_001;run0230	Repeated	STR	2h	2.89327	inducible,
exp16_str_12_S23_R2_001;run0230	Repeated	STR	2h	3.10157	inducible,
exp16_str_9_S21_R2_001;run0230	Repeated	STR	2h	3.08434	inducible,
exp17_str_6_S29_R2_001;run0230	Repeated	STR	2h	3.36808	inducible,
exp17_str_7_S30_R2_001;run0230	Repeated	STR	2h	3.1586	inducible,
exp17_STR_6_S21_R2_001;run0194	Repeated	STR	2h	1.80653	baseline
exp17_STR_7_S22_R2_001;run0194	Repeated	STR	2h	1.75621	baseline
exp16_str_13_S24_R2_001;run0230	Repeated	STR	4h	2.75893	inducible,
exp16_str_14_S33_R2_001;run0230	Repeated	STR	4h	2.46092	inducible,
exp17_str_8_S31_R2_001;run0230	Repeated	STR	4h	4.01104	inducible,
exp17_str_9_S32_R2_001;run0230	Repeated	STR	4h	3.42732	inducible,
exp17_STR_8_S23_R2_001;run0194	Repeated	STR	4h	2.17057	baseline
exp17_STR_9_S24_R2_001;run0194	Repeated	STR	4h	1.70689	baseline
exp20-PFC2-cont1_S18_R2_001;run0250	Acute	PFC	0h	3.57976	inducible,baseline
exp20-PFC3-cont2_S19_R2_001;run0250	Acute	PFC	0h	2.86809	inducible,baseline
exp20-PFC4-cont3_S20_R2_001;run0250	Acute	LCtx	0h	3.33844	inducible,
exp20-PFC7-1hcoc1_S21_R2_001;run0250	Acute	LCtx	1h	6.60616	inducible,baseline
exp20-PFC8-1hcoc2_S22_R2_001;run0250	Acute	LCtx	1h	3.8355	inducible,baseline
exp20-PFC10-2hcoc2_S24_R2_001;run0250	Acute	LCtx	2h	3.37565	inducible,baseline
exp20-PFC9-2hcoc1_S23_R2_001;run0250	Acute	LCtx	2h	3.88747	inducible,baseline
exp20-PFC13-4hcoc1_S25_R2_001;run0250	Acute	LCtx	4h	3.41878	inducible,baseline
PFC1_cont1_S10_R2_001;run0006	Challenge	LCtx	0h	3.17939	inducible,
PFC-3_S10_R2_001;run0215	Challenge	LCtx	0h	2.36677	inducible,baseline
PFC-1_S9_R2_001;run0215	Challenge	LCtx	0h	2.45005	baseline
PFC4_1h1_S12_R2_001;run0006	Challenge	LCtx	1h	3.77978	inducible,baseline
PFC-5_S11_R2_001;run0215	Challenge	LCtx	1h	1.87223	inducible,
PFC6_1h2_S13_R2_001;run0006	Challenge	LCtx	1h	2.8562	inducible,baseline
PFC-7_S12_R2_001;run0215	Challenge	LCtx	1h	2.02225	inducible,
PFC10_S13_R2_001;run0215	Challenge	LCtx	2h	2.56168	inducible,
PFC11_S14_R2_001;run0215	Challenge	LCtx	2h	2.61877	inducible,
PFC8_2h1_S14_R2_001;run0006	Challenge	LCtx	2h	1.19331	inducible,baseline
PFC9_2h2_S15_R2_001;run0006	Challenge	LCtx	2h	3.30261	inducible,baseline
PFC12_4h1_S16_R2_001;run0006	Challenge	LCtx	4h	3.72048	inducible,baseline
PFC14_S15_R2_001;run0215	Challenge	LCtx	4h	2.44112	inducible,baseline
PFC15_S16_R2_001;run0215	Challenge	LCtx	4h	2.77511	inducible,
exp17_PFC1_S9_R2_001;run0222	Repeated	LCtx	0h	2.84243	inducible,baseline
exp17_PFC_2_S10_R2_001;run0222	Repeated	LCtx	0h	3.62917	inducible,baseline
exp17_PFC_4_S11_R2_001;run0222	Repeated	LCtx	1h	2.74741	inducible,baseline
exp17_PFC_5_S12_R2_001;run0222	Repeated	LCtx	1h	4.60128	inducible,baseline
exp17_PFC_6_S13_R2_001;run0222	Repeated	LCtx	2h	3.23053	inducible,baseline
exp17_PFC_7_S14_R2_001;run0222	Repeated	LCtx	2h	3.25108	inducible,baseline
exp17_PFC_8_S15_R2_001;run0222	Repeated	LCtx	4h	2.95987	inducible,baseline
exp20_Nac1-cont1_S1_R2_001;run0010	Acute	NAC	0h	2.84029	inducible,baseline
exp20_Nac2-cont2_S2_R2_001;run0010	Acute	NAC	0h	3.33022	inducible,
exp20_Nac3-cont3_S3_R2_001;run0010	Acute	NAC	0h	3.43551	inducible,baseline
exp20_Nac4-cont4_S4_R2_001;run0010	Acute	NAC	0h	3.39093	inducible,
exp20_Nac5-1h1_S5_R2_001;run0010	Acute	NAC	1h	3.55728	inducible,
exp20_Nac6-1h2_S6_R2_001;run0010	Acute	NAC	1h	3.29513	inducible,
exp20_Nac7-1h3_S7_R2_001;run0010	Acute	NAC	1h	3.3914	inducible,baseline
exp20_Nac8-1h4_S8_R2_001;run0010	Acute	NAC	1h	3.34146	inducible,baseline
exp20_Nac10-2h2_S10_R2_001;run0010	Acute	NAC	2h	2.61015	inducible,baseline
exp20_Nac12-2h4_S12_R2_001;run0010	Acute	NAC	2h	3.65425	inducible,baseline
exp20_Nac9-2h1_S9_R2_001;run0010	Acute	NAC	2h	2.96486	inducible,
exp20_Nac13-4h1_S13_R2_001;run0010	Acute	NAC	4h	3.55573	inducible,baseline
exp20_Nac15-4h3_S15_R2_001;run0010	Acute	NAC	4h	3.67262	inducible,baseline
exp20_Nac16-4h4_S16_R2_001;run0010	Acute	NAC	4h	3.68346	inducible,
NAc1_cont1_S1_R2_001;run0006	Challenge	NAC	0h	5.67605	inducible,baseline
NAc2_cont2_S2_R2_001;run0006	Challenge	NAC	0h	3.54601	inducible,
NAc-1_S1_R2_001;run0215	Challenge	NAC	0h	4.31313	baseline
NAc4_1h1_S4_R2_001;run0006	Challenge	NAC	1h	3.67411	inducible,
NAc-5_S3_R2_001;run0215	Challenge	NAC	1h	2.05932	inducible,baseline
NAc6_1h2_S5_R2_001;run0006	Challenge	NAC	1h	3.34995	inducible,
NAc-7_S4_R2_001;run0215	Challenge	NAC	1h	2.01538	inducible,baseline
NAc-10_S5_R2_001;run0215	Challenge	NAC	2h	2.11323	inducible,
NAc-11_S6_R2_001;run0215	Challenge	NAC	2h	1.76931	inducible,baseline
NAc8_2h1_S6_R2_001;run0006	Challenge	NAC	2h	3.04354	inducible,baseline
NAc9_2h2_S7_R2_001;run0006	Challenge	NAC	2h	3.61588	inducible,
NAc12_4h1_S8_R2_001;run0006	Challenge	NAC	4h	3.11238	inducible,
NAc13_4h2_S9_R2_001;run0006	Challenge	NAC	4h	3.40531	inducible,baseline
NAc-14_S7_R2_001;run0215	Challenge	NAC	4h	2.13558	inducible,baseline
NAc-15_S8_R2_001;run0215	Challenge	NAC	4h	2.10752	inducible,
exp17_NAc1_S1_R2_001;run0222	Repeated	NAC	0h	3.29883	inducible,baseline
exp17_NAc_2_S2_R2_001;run0222	Repeated	NAC	0h	3.15409	inducible,baseline
exp17_NAc_4_S3_R2_001;run0222	Repeated	NAC	1h	3.30117	inducible,baseline
exp17_NAc_5_S4_R2_001;run0222	Repeated	NAC	1h	3.60282	inducible,baseline
exp17_NAc_6_S5_R2_001;run0222	Repeated	NAC	2h	4.0728	inducible,baseline
exp17_NAc_7_S6_R2_001;run0222	Repeated	NAC	2h	3.08459	inducible,baseline
exp17_NAc_8_S7_R2_001;run0222	Repeated	NAC	4h	3.60224	inducible,baseline
exp17_NAc_9_S8_R2_001;run0222	Repeated	NAC	4h	3.5499	inducible,baseline
exp20-LH1_S1_R2_001;run0255	Acute	LH	0h	4.13733	baseline
exp20-LH2_S2_R2_001;run0255	Acute	LH	0h	2.81064	baseline
exp20-LH5_S3_R2_001;run0255	Acute	LH	1h	3.63751	baseline
exp20-LH6_S4_R2_001;run0255	Acute	LH	1h	3.42869	baseline
exp20-LH11_S5_R2_001;run0255	Acute	LH	2h	3.35658	baseline
exp20-LH12_S6_R2_001;run0255	Acute	LH	2h	3.69501	baseline
exp20-LH15_S7_R2_001;run0255	Acute	LH	4h	3.28448	baseline
exp20-LH16_S8_R2_001;run0255	Acute	LH	4h	3.41886	baseline
LH3_cont2_S20_R2_001;run0006	Challenge	LH	0h	5.10161	baseline
LH3_S19_R2_001;run0215	Challenge	LH	0h	2.61565	baseline
LH4_1h1_S21_R2_001;run0006	Challenge	LH	1h	5.94919	baseline
LH7_S21_R2_001;run0215	Challenge	LH	1h	4.59439	baseline
LH8_2h1_S23_R2_001;run0006	Challenge	LH	2h	2.81038	baseline
LH9_2h2_S24_R2_001;run0006	Challenge	LH	2h	4.15327	baseline
LH12_4h1_S25_R2_001;run0006	Challenge	LH	4h	3.26663	baseline
LH14_S24_R2_001;run0215	Challenge	LH	4h	3.33998	baseline
exp17_LH1_S18_R2_001;run0255	Repeated	LH	0h	3.19358	baseline
exp17_LH2_S19_R2_001;run0255	Repeated	LH	0h	2.40001	baseline
exp17_LH4_S20_R2_001;run0255	Repeated	LH	1h	4.01347	baseline
exp17_LH5_S21_R2_001;run0255	Repeated	LH	1h	4.51027	baseline
exp17_LH6_S22_R2_001;run0255	Repeated	LH	2h	4.73173	baseline
exp17_LH7_S23_R2_001;run0255	Repeated	LH	2h	4.39906	baseline
exp17_LH8_S24_R2_001;run0255	Repeated	LH	4h	3.36334	baseline
exp17_LH9_S25_R2_001;run0255	Repeated	LH	4h	4.16292	baseline
exp20-Amg1_S9_R2_001;run0255	Acute	AMG	0h	3.413	inducible,baseline
exp20-Amg2_S10_R2_001;run0255	Acute	AMG	0h	3.29816	inducible,baseline
exp20-Amg5_S11_R2_001;run0255	Acute	AMG	1h	4.19319	inducible,baseline
exp20-Amg6_S12_R2_001;run0255	Acute	AMG	1h	4.15193	inducible,baseline
exp20-Amg11_S13_R2_001;run0255	Acute	AMG	2h	5.86965	inducible,baseline
exp20-Amg12_S14_R2_001;run0255	Acute	AMG	2h	3.47124	inducible,baseline
exp20-Amg15_S15_R2_001;run0255	Acute	AMG	4h	4.8212	inducible,baseline
exp20-Amg16_S16_R2_001;run0255	Acute	AMG	4h	2.82951	inducible,baseline
Amg3_S27_R2_001;run0215	Challenge	AMG	0h	2.97185	inducible,
amy1_cont1_S27_R2_001;run0006	Challenge	AMG	0h	4.01491	inducible,baseline
amy2_cont2_S28_R2_001;run0006	Challenge	AMG	0h	4.61129	inducible,
Amg1_S26_R2_001;run0215	Challenge	AMG	0h	3.23496	,baseline
Amg5_S28_R2_001;run0215	Challenge	AMG	1h	3.23904	inducible,
Amg7_S29_R2_001;run0215	Challenge	AMG	1h	2.39078	inducible,baseline
amy4_1h1_S29_R2_001;run0006	Challenge	AMG	1h	8.91109	inducible,baseline
amy6_1h2_S30_R2_001;run0006	Challenge	AMG	1h	3.23964	inducible,
Amg10_S30_R2_001;run0215	Challenge	AMG	2h	3.29045	inducible,baseline
Amg11_S31_R2_001;run0215	Challenge	AMG	2h	2.41453	inducible,
amy8_2h1_S31_R2_001;run0006	Challenge	AMG	2h	4.92987	inducible,
amy9_2h2_S32_R2_001;run0006	Challenge	AMG	2h	2.68514	inducible,baseline
Amg14_S32_R2_001;run0215	Challenge	AMG	4h	2.46415	inducible,
Amg15stars_S33_R2_001;run0215	Challenge	AMG	4h	2.76376	inducible,baseline
amy12_4h1_S33_R2_001;run0006	Challenge	AMG	4h	5.70093	inducible,baseline
amy13_4h2_S34_R2_001;run0006	Challenge	AMG	4h	3.79244	inducible,
exp17_Amg1_S26_R2_001;run0255	Repeated	AMG	0h	3.28721	inducible,baseline
exp17_Amg2_S27_R2_001;run0255	Repeated	AMG	0h	3.26081	inducible,baseline
exp17_Amg4_S28_R2_001;run0255	Repeated	AMG	1h	3.39972	inducible,baseline
exp17_Amg5_S29_R2_001;run0255	Repeated	AMG	1h	3.73208	inducible,baseline
exp17_Amg6_S30_R2_001;run0255	Repeated	AMG	2h	3.41231	inducible,baseline
exp17_Amg7_S31_R2_001;run0255	Repeated	AMG	2h	2.96658	inducible,baseline
exp17_Amg8_S32_R2_001;run0255	Repeated	AMG	4h	3.07615	inducible,baseline
exp17_Amg9_S33_R2_001;run0255	Repeated	AMG	4h	3.11682	inducible,baseline
