# Supplementary material for: Egr2 induction in spiny projection neurons of the ventrolateral striatum contributes to cocaine place preference in mice
Source: eLife. 2021 Mar 16;10:e65228. doi: 10.7554/eLife.65228 (PMC8057818; doi:10.7554/eLife.65228)
Supplement: Supplementary file 2. [file elife-65228-supp2.xlsx]

## Sheet: AMG
Supplementary Table S2: Normalized reads of baseline shifted genes (Amygdala)
SYMBOL	p.adj_Acute_Repeated	p_adj_Acute_Challenge	counts_Challenge_0h	counts_Challenge_0h.1	counts_Repeated_0h	counts_Repeated_0h.1	counts_Acute_0h	counts_Acute_0h.1
1110008P14Rik	0.0401354	0.0119718	1380.1	1195.65	1272.5	1286.12	859.4	1051.2
3110035E14Rik	ns	7.40651e-08	1008.9	1010.6	632.592	611.296	458.608	636.009
Acot7	ns	0.00364729	2324.48	2276.39	1940.65	1919.28	1700.18	1890.73
Adcy5	ns	0.0102501	567.902	556.845	678.598	717.518	728.089	793.739
Agt	ns	0.00469993	395.522	315.18	517.575	447.798	570.32	502.702
Aldoa	ns	0.0161586	8577.75	7745.98	7492.81	7243.91	6356.82	6967.61
Amph	ns	0.0112631	1119.94	1241.28	964.049	1033.06	919.176	885.325
Ap1s1	0.030897	ns	1634.96	1705.18	2178	2123.39	1765.84	1676.01
Apoe	ns	0.00220546	10310	9375.96	13616.9	13012.2	13683.8	11709.7
App	ns	1.03954e-06	3949.93	4419.27	3390.9	3103.34	2863.36	2989.75
Arpp21	0.00257899	0.00153454	839.691	926.104	850.078	893.513	1167.1	1251.67
Asns	ns	0.0289146	541.463	535.721	467.386	495.702	379.234	412.134
Atp5k	0.00561747	ns	2251.51	1894.46	2587.88	2357.71	1832.47	1863.25
Atp6v1g2	ns	0.00547778	2528.59	2409.05	2171.72	2078.61	1933.41	1996.56
Atpif1	ns	0.0100994	3341.84	3632.59	3093.95	2831.54	2719.31	2862.55
B3gat1	ns	0.0392683	234.775	261.101	299.043	311.376	373.354	337.848
Basp1	ns	0.0218482	2337.17	2316.11	1899.87	1622.49	1806.01	1891.75
Bcan	ns	0.0141153	745.569	727.533	1032.01	1095.54	1042.65	906.695
Bcas1	0.0168638	ns	324.666	366.724	278.131	323.872	440.969	463.015
Bex3	ns	0.0460691	1885.6	1873.33	1791.12	1662.06	1490.48	1584.43
C1qa	ns	0.037516	476.953	473.192	575.083	641.496	662.434	603.445
C1ql3	ns	0.00131993	376.486	301.66	335.64	268.679	212.645	172.994
Cadm4	0.0186403	ns	557.326	552.621	781.068	860.188	604.618	598.357
Calr	ns	0.0010854	2468.31	2652.41	2225.05	2174.42	2041.2	1893.78
Camk2n1	3.29569e-05	ns	3671.8	3871.72	3283.2	3045.02	4411.65	4186.47
Cck	0.000359208	2.60071e-14	5403	5157.79	4445.92	4381.13	3301.39	3489.4
Cd81	ns	0.00419241	1750.24	1574.21	1860.13	1896.37	2130.37	2127.83
Cdk14	ns	0.0321332	911.604	890.615	690.1	782.084	707.511	678.749
Cdk18	ns	0.00210336	408.212	427.563	347.141	337.41	260.662	281.879
Cenpb	ns	4.11021e-05	437.824	399.678	765.384	678.986	699.671	626.851
Chgb	ns	0.00910882	1110.42	1124.68	814.527	844.567	795.705	896.518
Chordc1	ns	0.000983303	457.917	463.052	311.591	314.5	314.558	270.685
Cldn11	ns	0.00547778	838.633	843.296	971.368	1000.78	1042.65	1223.17
Cltc	ns	0.034699	2017.8	2021.21	1625.92	1640.19	1499.3	1745.21
Clu	ns	0.00510809	5889.47	5620.84	6719.07	7100.2	7050.61	6991.01
Cnp	ns	0.0238726	1391.73	1306.35	1620.69	1609.99	1595.33	1802.2
Cnr1	ns	1.03473e-06	1080.81	971.733	711.012	732.097	610.498	673.661
Cotl1	0.0142524	ns	437.824	383.623	585.539	447.798	353.755	315.46
Cplx2	ns	0.000451146	2153.16	1978.96	2725.9	2672.21	2669.33	2726.19
Cpne6	0.00195999	ns	1750.24	1632.51	1819.35	1967.19	1438.54	1393.11
Cpne7	0.0119198	ns	491.758	426.718	683.826	718.559	485.066	501.684
Csdc2	ns	0.0384111	653.563	621.909	807.208	803.953	826.083	810.021
Csrp1	ns	0.0322557	717.015	731.757	1144.94	1181.98	897.618	948.417
Cst3	ns	0.0214061	16772.7	15870.5	21890.8	20600.8	20439.4	18733.3
Dbp	ns	5.13575e-09	359.565	311.8	578.22	507.157	636.956	640.08
Diras2	ns	0.000579527	913.719	861.04	824.983	792.498	625.196	627.868
Dkk3	ns	0.000202573	726.533	754.572	608.543	642.538	429.21	532.212
Dnaja1	ns	0.0343276	1094.56	1199.03	757.019	818.533	875.079	921.959
Dnajb1	ns	4.97257e-07	546.751	531.496	285.45	308.251	306.719	282.897
Dynll1	ns	0.00294794	2616.37	2616.08	2152.9	2110.9	2088.23	2070.85
Egr1	ns	0.00547778	598.57	635.429	286.496	343.659	457.628	369.394
Elmod1	0.0047731	ns	693.749	702.183	518.621	485.288	673.213	773.387
Enc1	ns	6.05281e-07	2204.98	2045.71	1753.48	1801.61	1499.3	1423.64
Etv1	ns	0.00320217	620.779	685.283	586.585	535.275	477.227	429.433
Fbxl16	ns	0.0236249	1692.07	1761.79	1930.19	1965.1	2188.19	2059.65
Fkbp4	ns	0.0306237	879.877	766.402	695.328	698.773	648.715	596.322
Fxyd6	ns	0.00287844	1744.95	1852.21	1362.42	1285.08	1317.03	1430.77
Gnal	0.00298049	ns	485.413	514.596	373.281	378.025	557.581	559.688
Gnb1	ns	0.0227981	3120.81	3363.89	2555.46	2923.18	2609.56	2619.34
Gng7	0.0446858	6.05281e-07	418.788	383.623	452.747	562.351	697.711	721.489
Got1	ns	0.0190028	1279.63	1313.11	925.361	922.672	1010.31	1035.93
Gpr88	2.16753e-08	1.01061e-05	182.955	184.207	134.883	164.54	328.277	409.081
Grik5	ns	0.000661061	603.858	600.785	923.27	980.99	894.678	815.109
Hnrnpdl	ns	0.0236249	580.592	553.465	652.458	707.104	711.43	801.88
Homer1	ns	0.0180943	721.246	730.912	468.432	597.758	536.023	508.807
Hsp90ab1	ns	0.00547778	8120.89	8092.43	6868.59	6444.12	6839.92	6414.02
Hspa4	ns	0.0306237	802.677	840.761	708.921	743.553	633.036	634.991
Hspa4l	ns	0.0214061	868.244	902.445	613.771	698.773	642.835	694.013
Hspa5	ns	2.84283e-05	1695.24	1651.95	1222.31	1306.94	1225.89	1153.97
Hspa8	ns	1.77769e-06	6231.05	6700.73	4937.35	4926.82	4597.84	4912.03
Hspe1	ns	0.0497281	762.49	735.982	597.041	548.813	561.501	593.269
Hsph1	ns	1.90865e-07	2303.33	2327.94	1632.19	1784.94	1629.63	1439.92
Id3	ns	0.00211784	201.991	199.417	240.489	341.576	330.237	356.165
Id4	0.00298049	ns	524.542	544.171	460.067	495.702	682.033	705.207
Ivd	ns	0.006851	154.402	190.122	246.763	248.892	291.04	269.668
Kcnt1	ns	0.0433321	217.854	193.502	276.04	286.382	275.361	330.725
Kif3c	ns	0.0441507	575.304	568.675	492.481	518.612	441.949	418.24
Ldha	ns	1.01061e-05	3246.66	3508.38	2369.34	2439.98	2329.3	2554.21
Lingo1	0.0153214	ns	1179.16	1218.47	1301.78	1400.67	1084.78	956.558
Lmo4	ns	0.000129811	1581.03	1747.43	1335.24	1289.24	1198.46	1208.93
Ly6c1	4.55325e-05	ns	249.581	259.411	443.337	485.288	280.26	238.122
Ly6h	0.00679219	ns	3763.8	3115.46	4922.71	4529.01	3513.06	3659.34
Lynx1	0.0401354	ns	876.705	831.466	882.492	883.099	677.133	669.59
Lypd1	ns	1.01061e-05	1146.38	1138.2	1562.14	2030.71	1872.65	1691.28
Mag	ns	0.0497281	538.29	532.341	626.318	840.402	774.146	954.522
Mal	ns	0.00419732	648.275	710.633	801.98	810.202	859.4	1049.16
Mapk10	ns	0.0190028	1264.82	1304.66	1136.57	1046.6	1021.09	996.245
Mapk3	ns	0.0343276	1342.02	1161.86	1744.07	1670.39	1544.37	1595.62
Mapk8ip1	ns	0.000284593	1048.03	876.25	1649.97	1764.11	1301.35	1460.28
Marcksl1	ns	0.0273104	355.335	369.259	446.474	429.053	509.565	486.42
Mbd3	ns	0.0493244	800.561	754.572	1084.29	1028.89	1012.27	950.452
Mbp	0.000890969	1.49546e-06	8352.49	8678	8291.66	9983.81	11829.7	12730.4
Mdh1	ns	0.0286363	4326.42	4558.7	3115.91	3189.78	3469.94	3855.74
Mif	0.00574012	ns	1559.88	1520.13	1840.27	1739.12	1406.2	1343.25
Mmp17	ns	0.0273351	747.684	758.797	642.002	709.187	591.879	547.477
Mobp	ns	8.46661e-16	1894.06	1843.76	2743.67	2747.19	3006.43	3441.57
Mt1	6.41464e-06	0.00299447	4989.5	4677.84	10401.7	8350.91	6391.12	6347.88
Napb	ns	0.0223682	2441.87	2573.83	2164.4	2102.57	1999.06	2099.34
Ncald	ns	0.00115696	3143.02	3397.69	2607.74	2553.49	2317.54	2656.99
Ndufa3	0.0110547	ns	2255.74	2047.4	2577.42	2405.61	1923.61	1965.01
Ndufb7	0.0469178	ns	1195.03	1062.15	1454.44	1299.65	1030.89	1089.87
Ndufc1	ns	0.0312561	1193.97	1177.06	1130.3	1026.81	921.136	951.47
Nefl	ns	0.00560858	1733.32	1739.83	1397.98	1512.1	1357.21	1357.5
Negr1	0.00859187	0.0223682	720.188	754.572	712.058	694.607	950.534	958.593
Neurod6	ns	1.4721e-05	430.421	353.204	228.988	284.3	189.127	214.717
Nme7	0.030897	ns	277.077	202.797	317.864	308.251	203.826	183.171
Nov	ns	0.000671779	893.625	929.484	815.573	733.139	628.136	655.344
Nrxn2	ns	0.0163589	1019.47	916.809	1603.96	1507.93	1378.76	1165.17
Nsf	ns	1.77769e-06	3610.46	3909.75	2629.7	2621.18	2582.12	2798.44
Oxr1	ns	0.00510809	922.179	1009.76	727.742	690.442	667.334	747.947
Pacs2	ns	0.00896575	338.414	334.614	407.786	441.549	476.247	488.455
Palm	ns	0.0144146	749.799	681.903	1044.56	1143.45	984.831	907.712
Pcbp4	ns	0.00985227	618.664	583.885	761.201	815.409	781.006	837.497
Pde10a	ns	0.037516	293.997	309.265	279.177	351.99	414.511	447.75
Pebp1	ns	0.020607	1254.25	1361.27	1137.62	1115.33	1025.99	1035.93
Penk	0.00457345	1.50949e-05	1695.24	1624.06	1670.88	2116.1	2918.24	3516.88
Pfkp	ns	0.0451162	1179.16	1309.73	1039.33	1007.02	998.55	987.086
Pgm2l1	ns	0.00194146	1586.32	1612.23	1323.74	1412.13	1156.32	1261.84
Phldb1	ns	0.0142557	248.523	221.386	262.447	289.506	342.976	362.271
Plch2	ns	0.0142751	279.192	251.806	262.447	258.265	176.388	161.801
Plekhm2	ns	0.0181939	187.185	223.076	303.226	303.045	322.398	300.196
Pllp	ns	0.00263917	177.668	173.222	211.212	259.306	307.699	281.879
Plp1	ns	2.92403e-06	5010.65	4711.64	5198.75	6024.44	6564.56	7397.04
Plpp3	0.00257899	0.00820094	727.591	839.071	785.25	701.897	1110.26	1021.68
Pls3	ns	1.13195e-05	848.151	889.77	588.676	642.538	553.661	573.935
Ppa1	ns	0.0180943	617.606	734.292	548.943	536.316	477.227	506.772
Ppia	0.0168638	ns	509.737	457.137	308.454	329.079	434.11	513.895
Ppm1l	ns	0.0433321	429.363	467.277	395.239	418.639	327.297	326.654
Ppp1r1b	1.81133e-06	2.53106e-16	368.026	381.088	450.656	580.054	841.761	1072.57
Ppp1r37	0.000743174	ns	318.321	334.614	484.116	472.791	303.779	291.038
Ppp1r9b	ns	4.11021e-05	2356.21	2483.41	3516.37	3365.77	3254.35	3178.01
Ppp3r1	6.62313e-08	ns	1200.31	1460.98	787.341	814.367	1350.35	1323.92
Prkcg	0.000338345	ns	1612.76	1809.96	1932.28	2029.67	1414.04	1448.07
Prmt2	ns	0.0325352	674.714	706.408	606.452	641.496	479.187	556.635
Prrc2a	0.0111939	ns	725.476	714.013	1097.89	1028.89	793.745	792.722
Rab3c	ns	0.0439766	1283.86	1267.48	1006.92	900.803	922.116	1074.6
Rasl10b	ns	0.000131543	947.56	840.761	1240.09	1464.19	1352.31	1262.86
Rbfox3	0.0375121	ns	950.733	894.84	1247.41	1254.88	1005.41	931.117
Resp18	ns	0.00168461	1239.44	1250.58	1091.61	1033.06	939.755	921.959
Rgs4	ns	0.00103686	1060.72	1045.25	759.11	789.374	794.725	724.542
Rnf14	ns	0.0494621	1100.9	1071.44	869.944	767.505	829.022	881.254
Rogdi	0.0401354	ns	1274.34	1269.17	1563.18	1625.61	1221	1304.58
Rph3a	ns	0.00469993	1232.04	1255.65	1113.57	1136.16	957.393	949.434
Rpl10	0.0219734	ns	481.183	476.572	417.197	431.136	587.959	597.34
Rplp1	ns	0.00302625	8735.32	7213.64	11436.8	10828.4	10669.5	10017.4
Rps14	ns	0.000410982	4507.26	3963.83	5873.17	5494.37	5484.68	5609.09
Rps9	ns	0.0497281	1237.33	1191.43	1612.32	1605.82	1577.69	1419.57
Rtn1	ns	0.00775165	9228.14	9980.97	7875.51	7591.73	7467.08	8155.16
Sccpdh	ns	0.000410982	736.051	764.712	469.477	532.15	479.187	525.089
Scrn1	ns	0.0327513	939.1	1016.52	804.071	815.409	745.728	781.528
Sh3gl2	ns	0.000131543	1825.32	1717.86	1355.11	1285.08	1181.8	1348.34
Shank1	ns	0.00447444	565.786	465.587	908.632	934.127	781.006	683.837
Slc17a7	0.000452469	7.09186e-06	3350.3	2894.92	2792.81	3193.94	2162.71	2133.94
Smap1	ns	0.0267064	580.592	620.219	440.2	465.501	391.973	477.261
Snap25	ns	0.0112631	7011.52	7948.78	5252.08	5567.27	5640.49	6300.05
Snhg11	0.00257899	0.000451146	3568.16	3345.3	5717.37	5593.31	4611.56	4281.1
Spock3	0.000889951	ns	434.651	460.517	359.689	296.796	488.006	590.216
Srebf1	ns	0.00320217	185.07	171.532	268.721	311.376	306.719	277.809
St6galnac5	ns	0.028519	563.671	542.481	494.572	511.323	420.391	395.852
Stip1	ns	4.49124e-05	1111.48	1103.55	881.446	849.774	791.785	738.788
Stmn2	ns	0.000579527	2261.03	2237.52	1866.41	1878.67	1562.99	1797.11
Sv2b	ns	0.000284593	1203.49	1302.97	1001.69	1113.25	826.083	929.082
Syn2	ns	0.00131993	4070.49	4265.49	3304.12	3587.59	3238.67	3319.46
Synj1	ns	0.00325494	2629.06	2601.71	2008.61	2129.64	2023.56	2111.55
Tagln3	ns	0.000579527	1799.94	1660.4	1335.24	1296.53	1276.85	1303.56
Thy1	0.0391381	0.00742936	6089.34	6411.75	6068.7	6307.7	5074.09	5216.29
Tpi1	ns	0.0264283	2963.24	3192.36	2942.34	3021.07	2532.14	2551.16
Trim32	ns	0.0176099	844.978	887.235	538.487	660.241	632.056	646.185
Tsc22d4	ns	0.0133464	749.799	711.478	1227.54	1013.27	1058.33	928.064
Tspan2	ns	0.0358372	428.306	441.927	506.073	535.275	544.842	632.956
Ttc3	ns	0.000994699	4563.31	4317.88	3781.96	3651.11	3483.66	3547.4
Tuba4a	ns	0.0161917	2472.54	2373.56	2211.46	2169.22	1854.03	2045.41
Tubb2a	ns	0.000129811	5682.19	5952.92	5154.84	4935.15	4476.33	4575.19
Ube2ql1	ns	0.0161586	822.77	916.809	737.152	721.683	664.394	649.238
Ube2w	ns	0.0497281	346.875	354.049	233.17	236.396	251.842	242.192
Usp2	ns	0.0161586	212.567	249.271	384.783	323.872	327.297	377.535
Vgf	ns	0.0180943	2056.92	2066.83	1967.83	2043.21	1748.2	1535.58
Vsnl1	ns	0.000624501	3403.18	3630.06	2677.8	2719.07	2519.4	2839.14
Vstm2l	ns	0.0029714	675.771	739.362	856.351	1035.14	960.333	1032.88
Wfs1	ns	0.00150822	835.46	823.861	974.505	1097.63	1111.24	1161.1
Ywhae	ns	0.0112631	3421.16	3640.2	2831.5	3079.39	2719.31	2947.01
Ywhag	ns	0.00263917	3315.4	3377.41	2676.75	2834.66	2560.56	2737.38
Ywhah	ns	0.029756	1034.28	1135.66	791.524	764.38	831.962	862.937
Ywhaq	ns	0.0481909	1703.7	1853.05	1393.79	1441.28	1384.64	1502
Zwint	ns	1.49546e-06	7363.68	7487.42	4936.31	5142.38	5198.54	5703.73

## Sheet: LH
Supplementary Table S2: Normalized reads of baseline shifted genes (lateral hypothalamus)
SYMBOL	p.adj_Acute_Repeated	p_adj_Acute_Challenge	counts_Repeated_0h	counts_Repeated_0h.1	counts_Acute_0h	counts_Acute_0h.1	counts_Challenge_0h	counts_Challenge_0h.1
Abca2	ns	0.000922085	875.097	968.187	1057.57	959.891	598.114	670.035
Akt1s1	2.55314e-05	ns	227.379	261.3	110.55	54.7206	139.396	138.713
Atp5k	0.0355023	ns	2348.89	2445.22	1566.25	1637.06	1513.71	2094.32
B2m	ns	0.000922085	1022.16	900.799	885.171	828.789	1498.36	1262.04
Cadm4	1.60037e-06	ns	923.076	871.918	502.499	478.805	617.151	707.19
Camk2n1	0.00116574	ns	1509.26	1482.54	2183.16	2235.57	2103.84	1873.87
Cldn11	ns	0.0324142	2897.52	2553.87	2561.97	2622.03	1877.24	1896.16
Cpne6	ns	0.0229488	617.47	631.247	675.668	607.627	402.223	443.387
Cst3	0.0403749	ns	21233.9	18970.4	14850.8	15017.4	15412.2	17262.4
Dbp	ns	4.19394e-08	395.306	400.202	544.245	598.507	237.035	288.573
Dnajc7	0.000661258	0.0499552	538.2	456.588	214.915	308.943	428.628	429.764
Egr1	0.000852528	ns	78.2268	104.52	204.865	202.922	186.68	221.694
Fam171a2	2.55314e-05	ns	351.499	378.198	136.834	192.662	211.244	241.51
Gas6	0.0256855	ns	267.014	320.437	152.296	182.402	251.159	246.464
Gm9843	ns	0.00184988	174.185	171.908	118.28	131.101	38.073	63.1641
Gpd1	ns	0.0386695	91.7861	103.145	129.104	163.022	73.0756	65.6411
Gsn	ns	0.000922085	289.961	288.806	316.188	316.924	168.872	172.153
Hspa1a	ns	0.000922085	64.6675	75.6396	57.9806	44.4605	132.027	151.098
Hspe1	ns	0.00716993	669.621	726.14	669.483	588.247	913.752	1034.16
Id3	ns	0.0324142	201.304	184.286	260.526	289.563	154.748	163.484
Impact	ns	0.0386695	2268.58	2439.72	2347.06	2295.99	3394.02	2969.95
Josd2	ns	0.0386695	905.345	871.918	743.698	778.629	445.822	569.716
Ly6a	0.000599026	ns	375.489	290.181	156.934	174.422	198.962	196.923
Ly6h	0.00415776	ns	3679.79	3560.56	2546.51	1982.48	2202.09	2863.44
Mag	ns	0.0321268	2165.32	2182.55	2020.05	2040.62	1356.5	1564.24
Map3k10	ns	0.0386695	181.486	170.533	226.511	157.322	90.8839	108.989
Mbp	ns	0.0321268	25638.6	26805.3	30668.7	27646.5	21736	22023.2
Metrn	1.74156e-16	0.000865349	722.816	731.641	272.122	290.703	472.842	483.02
Mobp	ns	1.26152e-06	9086.83	8409.75	8208.51	7537.77	4897.29	5080.38
Ndrg2	0.0355023	ns	8318.12	7165.13	5832.85	5567.82	6074.48	6030.32
Nrgn	0.00752727	0.00195329	937.679	882.92	1243.88	1573.22	849.273	920.214
Nrn1	0.00526681	ns	237.81	193.912	397.361	416.105	383.186	267.519
Pacs2	ns	0.0299856	656.062	656.002	786.99	800.289	492.493	577.147
Pbxip1	0.0403749	ns	322.294	264.051	138.38	189.242	177.469	203.116
Ppp1r37	1.9001e-08	ns	382.79	496.471	182.446	152.762	258.528	318.298
Ppp3ca	0.0286039	ns	1013.82	961.31	1415.5	1405.64	1301.24	1132
Ppp3r1	2.0395e-06	ns	464.146	360.32	812.502	894.91	676.103	521.414
Prmt1	5.86606e-14	7.0749e-07	432.855	464.84	166.984	144.782	353.71	335.637
Ptgds	ns	0.00107766	9617.73	8171.83	9827.33	9459.83	4968.52	6846.49
Ptk2b	6.27202e-05	0.0486452	80.3129	82.5159	183.219	245.103	116.061	106.512
Rac3	0.000940645	ns	507.953	470.341	197.134	303.243	304.584	355.453
Slirp	0.0117952	0.0229488	997.131	932.43	670.256	619.027	897.786	1011.86
Sncb	ns	0.00148558	2811.99	3031.08	3115.49	2884.23	1860.05	2164.92
Tac2	ns	0.0386695	413.038	451.087	340.153	346.564	490.65	569.716
Tbc1d10a	0.0212706	ns	106.388	110.021	37.8807	50.1606	69.3911	87.9344
Tbkbp1	0.00415776	ns	386.962	409.829	218.007	231.423	239.491	294.766
Ttr	0.00348267	ns	265.971	343.816	1207.54	745.568	349.412	478.066

## Sheet: NAC
Supplementary Table S2: Normalized reads of baseline shifted genes (Nucleus Accumbens)
SYMBOL	p.adj_Acute_Repeated	p_adj_Acute_Challenge	counts_Repeated_0h	counts_Repeated_0h.1	counts_Acute_0h	counts_Acute_0h.1	counts_Challenge_0h	counts_Challenge_0h.1
1500009C09Rik	ns	2.55841e-05	779.402	781.713	807.209	775.592	510.985	507.006
A230050P20Rik	ns	0.0406856	207.395	210.238	223.869	212.783	150.593	128.9
A830018L16Rik	ns	0.0360242	274.296	241.599	253.292	240.444	336.581	390.996
Abhd17a	ns	0.0257648	1325.76	1421.72	1142.37	1142.64	919.002	852.457
Acap3	ns	0.00215895	535.212	599.352	671.608	604.302	400.293	452.868
Acat1	ns	0.0365954	379.108	348.46	309.579	264.914	422.174	396.152
Acbd3	ns	0.0447133	73.5916	98.7305	83.1515	73.41	142.226	138.352
Acsl4	ns	0.0272292	199.589	152.161	163.745	130.861	247.77	234.598
Actn2	ns	0.0312762	243.075	248.568	336.444	318.11	228.463	215.692
Actr2	ns	0.0242698	1047.01	1118.56	996.539	988.375	1386.23	1205.64
Actr3	ns	0.000212274	307.747	279.93	260.968	289.384	472.372	456.305
Actr6	ns	0.039493	117.078	124.284	89.5478	89.3687	173.117	137.493
Adam15	ns	5.89556e-05	296.597	304.322	455.414	401.095	259.998	202.802
Adap1	ns	0.0172993	682.395	715.505	709.986	694.735	493.609	540.52
Adgrb1	ns	4.86612e-07	1258.86	1277.69	1375.2	1283.08	861.081	836.13
Adgrb2	ns	1.71544e-05	830.693	780.551	972.233	1001.14	597.866	668.56
Adora2a	ns	0.00163161	260.916	289.222	165.024	213.846	299.898	375.528
Aes	ns	0.0153132	2264.62	2281.25	2511.18	2525.73	2034.93	2005.68
Agap3	ns	0.0315002	1321.3	1439.14	1628.49	1493.73	1287.12	1133.46
Ahsa1	ns	0.00534064	143.838	151	138.159	129.797	221.384	250.066
Akap8	ns	0.00198914	257.571	253.215	355.633	354.283	238.76	171.007
Ankrd13b	ns	0.0157587	305.517	318.261	378.659	339.388	246.483	232.02
Anks3	ns	0.0255693	172.829	181.199	235.383	262.786	162.177	154.68
Ap2b1	ns	2.74074e-05	642.254	584.252	391.452	490.464	800.587	702.074
Apc2	ns	0.0443629	328.932	284.576	369.704	390.456	208.513	299.048
Apoe	ns	0.00164977	13709.2	12122.9	12375.5	13343.6	9365.71	10209.7
Aqp4	ns	0.0166627	153.873	144.03	162.465	171.29	279.304	257.8
Araf	ns	0.0157587	1564.38	1620.34	1379.04	1500.12	1825.78	1851.86
Arf1	ns	0.00213887	935.506	984.982	941.531	955.394	1285.19	1294.15
Arhgap33	ns	0.0278869	1016.9	1073.26	1205.06	1323.51	973.704	994.247
Arhgap5	ns	0.0281572	424.824	457.645	395.289	415.99	552.173	566.3
Arl6ip1	ns	0.0181275	857.454	878.12	809.768	790.487	1018.11	1084.48
Armc1	ns	0.00380943	266.491	320.584	257.13	276.617	428.61	413.339
Armcx1	ns	0.0194814	233.04	225.338	220.032	225.55	315.987	364.357
Arpc3	ns	0.0411714	715.846	818.882	629.393	600.047	858.507	769.962
Arpc5	ns	0.0270071	362.383	327.553	323.651	292.576	431.184	450.29
Asic4	ns	0.00112606	499.531	602.837	593.574	638.348	392.571	409.901
Atg12	ns	0.0289172	299.942	334.522	296.787	303.215	442.125	415.917
Atp5d	ns	0.0299561	1986.97	2066.37	2045.53	2006.54	1518.15	1706.63
Atp6v0a1	ns	0.0210377	1098.3	1190.57	1280.53	1132	947.962	885.112
Atp6v0b	ns	0.0182975	2249.01	2295.19	2655.73	2760.85	2193.89	2168.09
Atp6v1a	ns	7.99984e-07	1285.62	1345.06	1038.75	1014.97	1566.42	1563.98
Atp6v1d	ns	0.0118031	1389.32	1376.42	1294.61	1289.46	1644.94	1667.1
Atp6v1e1	ns	0.000672762	2033.81	2014.1	1991.8	1960.79	2554.93	2711.19
Atp6v1h	ns	0.00123808	869.719	948.974	895.478	829.852	1230.48	1186.74
Atxn2l	ns	2.54358e-06	268.721	267.153	411.92	383.009	218.166	180.46
AW551984	ns	0.0248486	72.4766	98.7305	37.0984	76.6017	130.642	116.869
B2m	ns	0.000145442	844.074	851.405	813.606	901.134	1271.03	1232.28
Basp1	ns	0.00239396	1010.21	1047.7	867.334	778.784	1144.89	1123.15
Begain	ns	0.00206189	837.384	838.628	1050.27	1054.34	755.538	773.399
Brsk1	ns	0.0111504	459.39	470.422	504.026	480.889	358.462	323.109
Bsg	ns	0.00363165	2340.44	2468.26	2550.83	2818.3	2052.31	2070.99
Bsn	ns	0.0016909	735.916	854.89	860.938	751.122	545.094	550.832
Btbd1	ns	0.049607	314.437	347.299	253.292	284.065	361.68	405.605
C1qtnf4	ns	4.94978e-05	2088.44	2183.69	1987.96	2070.37	1496.27	1213.38
Cacng2	ns	0.0192364	157.219	171.907	213.635	210.655	125.494	133.196
Cacng7	ns	0.0422831	210.74	197.461	232.824	224.486	169.899	103.12
Cacybp	ns	4.88016e-07	525.177	590.06	456.694	472.377	844.349	774.258
Cadm4	ns	0.0397862	588.733	602.837	698.473	590.472	493.609	456.305
Calb1	ns	0.000778578	612.149	641.167	748.364	919.221	1251.08	1203.06
Calm1	ns	0.00725197	7567.67	7782.28	7294.31	7256.95	8866.31	9022.99
Calm2	ns	0.00215895	5939.74	5949.38	4912.34	5414.25	6723.26	6506
Caln1	ns	0.00309437	1313.5	1275.37	1335.54	1228.82	998.159	843.005
Camk2a	5.12006e-09	0.0119748	1327.99	1292.79	745.805	769.209	1043.21	964.171
Camk4	ns	0.000821437	1149.59	1140.63	1350.89	1549.06	1076.67	963.311
Canx	ns	1.68057e-05	1569.95	1628.47	1568.37	1409.68	2148.84	2165.52
Car10	ns	0.0443629	91.432	84.792	63.9627	42.5565	109.405	97.1045
Car11	ns	0.000937043	1565.49	1686.55	1790.96	1919.3	1312.86	1405.87
Carf	ns	0.0443795	72.4766	84.792	112.574	115.966	64.9994	58.4346
Caskin1	ns	0.000912518	363.498	354.268	374.821	418.118	240.047	249.206
Ccng1	ns	0.0089741	229.695	204.43	172.699	153.203	258.711	277.564
Cct2	ns	0.00013438	655.635	681.821	584.619	576.641	832.121	953.859
Cct3	ns	0.000555212	726.996	751.513	646.023	612.814	893.903	934.094
Cct4	ns	0.000821437	346.773	362.399	292.949	339.388	500.045	509.584
Cct7	ns	0.00916304	848.534	904.836	798.254	701.119	965.338	1103.38
Cd200	ns	0.000412775	351.233	362.399	249.455	284.065	445.986	435.681
Cdk17	ns	0.00104702	929.931	882.766	820.002	844.747	1236.28	1115.41
Cdk5r2	ns	0.0011707	1387.09	1552.97	1364.96	1396.92	1010.39	992.529
Cdkn2aipnl	ns	0.0297581	220.775	210.238	176.537	179.801	252.275	300.766
Celf3	ns	0.0397764	306.632	276.445	308.3	328.749	241.334	177.022
Celf5	0.0465253	0.00818085	582.043	643.49	840.47	908.582	654.499	609.266
Celsr3	ns	4.86612e-07	235.27	243.922	345.399	320.238	158.959	154.68
Cenpb	ns	1.77192e-07	829.578	806.105	864.776	849.002	480.738	529.349
Chd3	ns	0.00268832	2039.38	2100.05	2460.01	2332.1	1875.97	1800.3
Chmp2b	ns	0.0224087	245.305	231.145	217.473	205.335	305.047	336.858
Chmp5	ns	0.0397764	599.883	548.244	561.593	580.896	794.795	722.698
Chordc1	ns	4.88016e-07	357.923	413.506	322.372	307.471	593.361	577.471
Clasrp	ns	0.000163894	162.794	146.353	209.798	193.632	99.7516	91.9485
Cltc	ns	0.00758162	1705.99	1825.93	1675.82	1677.79	2172.01	2134.58
Cmpk1	ns	0.00102564	244.19	221.853	241.779	210.655	361.036	407.323
Cnih2	ns	0.0144303	2447.48	2381.15	2443.38	2397	1926.17	1944.67
Cnp	ns	0.0038829	2130.81	1980.42	2497.1	2051.22	1655.23	1692.88
Cntfr	0.045215	0.0299561	216.315	198.622	90.827	109.583	210.444	141.79
Cntnap1	ns	0.00348309	472.771	530.821	594.853	526.637	401.581	328.265
Col6a1	ns	0.011274	534.097	493.652	675.446	636.22	469.798	470.055
Commd8	ns	0.0129987	256.456	240.438	222.59	246.828	341.086	382.403
Copb1	ns	0.0065709	265.376	298.514	240.5	250.02	383.561	377.247
Cops2	ns	0.0492633	344.543	384.468	399.127	386.2	545.094	522.474
Cox6a1	ns	0.0192364	5678.82	6037.66	6095.65	6056.86	4805.45	5113.89
Cplx2	ns	0.0284978	4876	5084.04	5376.7	6077.07	4419.96	4810.54
Cpne5	ns	0.0422831	1001.29	1163.86	1230.64	1189.45	913.853	968.467
Creld2	ns	0.0370719	70.2466	78.9844	90.827	68.0904	138.365	151.242
Crocc	ns	0.00534064	198.474	227.661	313.417	312.79	187.276	199.365
Csf2ra	ns	0.00162849	223.005	170.746	241.779	245.764	137.722	127.181
Cyfip2	ns	0.0158978	839.614	924.582	713.824	793.679	974.348	1056.12
Dbndd2	ns	0.0284978	422.594	362.399	519.377	450.035	362.967	305.063
Dbp	ns	0.00197801	990.142	926.905	913.387	1089.45	716.924	682.31
Dcun1d4	ns	0.0370719	278.756	277.607	252.013	283.001	372.62	398.73
Ddn	ns	0.0113362	1471.83	1437.98	1883.06	1704.39	1462.81	1210.8
Ddr1	ns	0.0013083	269.836	249.73	230.266	229.805	137.078	116.869
Dennd6b	ns	0.000158309	249.766	256.699	291.67	285.129	147.375	164.992
Dgat2	ns	0.0299561	669.015	709.698	850.704	793.679	590.143	649.655
Dlgap3	ns	7.54064e-05	1398.24	1649.38	1541.5	1615.02	1069.59	1075.02
Dnaja1	ns	1.11515e-05	926.586	911.805	895.478	842.619	1281.33	1346.57
Dnajb11	ns	0.0363237	219.66	243.922	203.401	160.651	281.235	274.986
Dnajc12	ns	0.0472381	86.9719	80.1459	48.6117	76.6017	120.345	118.588
Dnajc5	ns	0.0411714	2139.73	2097.73	2041.69	1911.85	1614.04	1593.2
Dot1l	ns	0.000205066	158.334	188.169	250.734	286.193	150.593	111.713
Dpysl2	ns	5.13742e-06	1094.95	1110.43	1063.06	969.225	1606.32	1487.5
Dpysl5	ns	0.0485642	176.174	199.784	239.22	172.354	135.791	116.01
Dscaml1	ns	0.0496767	179.519	174.23	194.447	191.504	122.276	124.603
Dtx3	3.98692e-09	3.69691e-05	332.277	315.937	666.491	704.31	371.977	445.993
Dusp14	ns	0.0342959	267.606	295.03	248.175	281.937	368.759	403.886
Dvl1	ns	0.0295583	323.357	313.614	387.614	356.411	252.919	262.956
Dynll1	ns	0.000912518	2146.42	2201.11	1935.51	2010.8	2589.04	2622.68
Dynll2	ns	0.0422831	4574.95	4879.61	4528.56	4800.37	3963.68	3718.33
Eef1a1	ns	0.000256115	1524.24	1375.26	1161.56	1342.66	1764.64	1836.39
Eid1	ns	0.0420021	971.187	896.705	717.661	819.213	1023.9	975.342
Eif1	ns	0.0288979	2224.47	2402.05	2121	2201.24	2629.58	2727.52
Eif3m	ns	0.00965636	147.183	156.807	120.25	148.948	216.236	255.222
Eif4a2	ns	0.0125151	506.221	623.744	488.675	537.276	722.073	734.729
Eif4g2	ns	0.0201648	1178.58	1345.06	1234.48	1223.5	1570.93	1600.08
Elmod1	ns	0.00743811	1695.95	1659.83	1640	1929.94	2355.42	2341.68
Eml5	ns	0.000912518	185.094	178.876	271.202	250.02	155.098	124.603
Enc1	ns	0.000346998	652.29	800.297	502.747	527.701	759.399	854.176
Epdr1	ns	0.000666132	498.416	574.96	464.369	476.633	713.063	713.246
Epha10	ns	0.0282051	111.502	112.669	134.322	91.4965	51.4847	63.5906
Erf	ns	0.0342959	226.35	253.215	234.103	263.85	176.335	141.79
Fam160b2	ns	0.00682553	166.139	192.815	176.537	200.016	111.979	96.2452
Fam193b	ns	0.0251618	201.819	182.361	294.228	230.869	151.88	175.304
Fam57b	ns	0.00199609	239.73	277.607	312.138	240.444	166.038	140.071
Fbf1	ns	0.0363725	326.702	257.861	392.731	363.858	245.839	269.83
Fbxl19	ns	0.000207511	298.827	365.883	367.146	347.899	218.166	164.992
Fbxw5	ns	0.0317646	441.55	414.668	433.667	450.035	307.621	325.687
Fgf12	ns	0.00114794	311.092	321.745	231.545	283.001	424.105	421.073
Fip1l1	ns	0.0186064	275.411	304.322	301.904	276.617	426.679	419.354
Fis1	ns	0.00607723	1771.77	1614.53	1984.12	2009.73	1588.3	1453.13
Fkbp4	ns	0.02937	638.909	741.059	603.808	587.28	800.587	791.445
Fnbp1	ns	0.00818085	343.428	297.353	365.867	351.091	240.691	222.567
Fus	ns	4.50286e-15	1490.79	1347.38	1843.4	1881	989.793	788.867
Fut9	ns	0.0118269	313.322	375.176	365.867	308.535	500.689	501.85
G3bp2	ns	0.000289134	919.895	923.42	828.957	880.92	1198.31	1247.75
Gabra1	0.0222247	5.42261e-05	783.862	860.697	583.34	543.659	884.249	855.035
Gabra4	ns	0.00839188	314.437	331.037	318.534	343.644	538.659	455.446
Gabrg1	ns	0.00237931	195.129	153.323	125.367	145.756	262.572	236.316
Gabrg3	ns	0.00972738	276.526	242.761	314.696	270.234	169.256	193.35
Gdap1	ns	0.0172408	384.684	389.114	262.247	350.027	454.352	460.602
Gigyf1	ns	0.0100956	381.338	334.522	518.098	476.633	283.166	172.726
Git1	ns	0.000159712	1330.22	1364.8	1555.57	1504.37	1101.13	1078.46
Gm9843	ns	0.029495	86.9719	87.1151	34.5399	60.643	84.3062	125.462
Gm996	ns	0.0001206	413.674	436.737	482.279	481.952	296.68	289.595
Gnai1	ns	0.0257648	612.149	621.421	512.981	542.596	846.923	641.062
Gnas	ns	2.95776e-07	2747.42	2659.91	2301.38	2266.13	3257.05	3441.62
Gng7	ns	0.0143862	3686.27	3685.55	4178.04	4739.73	3520.27	3584.27
Got1	ns	0.0266731	1054.81	1151.08	1017.01	963.905	1248.5	1302.75
Gp1bb	ns	0.0162901	196.244	198.622	234.103	230.869	147.375	140.93
Gpbp1	ns	0.0410753	282.101	334.522	319.813	258.531	408.016	427.947
Gpcpd1	ns	0.00758162	268.721	289.222	313.417	252.147	182.127	159.836
Gpm6a	ns	0.00792041	5348.77	5370.94	4744.75	4741.86	6250.88	5652.69
Gprasp1	ns	0.0406955	2007.04	1947.89	1770.49	1965.05	2359.29	2272.07
Gprasp2	ns	0.00355496	409.214	387.953	313.417	378.753	572.124	495.835
Grik5	ns	1.11749e-05	923.241	840.951	1025.96	917.093	624.895	599.814
Grin1	ns	5.60195e-06	1429.46	1378.74	1524.87	1476.71	1009.74	1014.01
Grin2b	ns	0.00197801	672.36	564.506	656.257	646.859	454.996	415.057
Gskip	ns	0.044168	246.42	289.222	298.066	289.384	410.59	422.791
Gtf2b	ns	0.0218271	208.51	216.045	157.348	145.756	245.839	234.598
Haghl	ns	0.0209866	500.646	443.706	457.973	483.016	328.215	336.858
Hcn2	ns	0.00145251	354.578	324.068	355.633	360.666	215.592	226.004
Hdac7	ns	0.000657132	114.848	69.6921	126.646	103.2	46.9798	35.2326
Hepacam	ns	0.0338492	304.402	264.83	340.282	298.959	232.325	189.053
Hint1	ns	0.018738	1661.39	1630.79	1403.34	1517.14	1742.11	2095.05
Hip1r	ns	0.0136507	373.533	371.691	370.984	368.114	268.364	219.989
Hist1h2bc	ns	0.00197801	640.024	554.052	536.007	634.092	892.616	838.708
Hnrnpc	ns	4.94978e-05	783.862	744.544	777.786	700.055	1119.15	1111.12
Hnrnpdl	ns	0.0127613	935.506	1002.4	1057.94	935.179	758.756	720.12
Hopx	ns	0.045406	243.075	127.769	97.2233	95.7521	176.335	173.585
Hpca	ns	1.37326e-05	6929.88	6994.76	7541.2	7712.3	5779.8	5486.84
Hpcal1	ns	0.0307464	280.986	278.768	226.428	227.677	305.69	375.528
Hprt	ns	9.26818e-05	703.581	646.975	546.241	560.682	855.933	836.989
Hrh3	ns	0.02937	686.855	718.99	693.356	640.475	535.441	423.651
Hs2st1	ns	0.0282051	191.784	176.553	188.05	168.098	265.146	287.017
Hsd17b12	ns	0.0188915	147.183	171.907	117.691	153.203	258.067	207.099
Hsp90aa1	ns	0.010279	467.195	390.276	488.675	578.769	719.498	843.005
Hsp90ab1	ns	0.0303482	6686.8	6872.8	5962.6	6206.87	7487.16	7165.97
Hsp90b1	ns	4.86612e-07	640.024	677.175	501.468	623.453	941.526	1063.85
Hspa5	ns	6.80781e-10	1354.76	1816.64	1341.94	1426.71	2705.52	2497.22
Hspa8	ns	2.95322e-08	5505.99	5451.08	4648.81	4413.11	6975.53	6423.51
Hspe1	ns	5.89556e-05	658.98	705.052	646.023	703.246	985.932	1096.51
Hsph1	ns	0.000207511	2017.08	2260.35	1979.01	2070.37	2829.08	2755.02
Iffo1	ns	0.0191516	177.289	205.592	220.032	215.974	123.563	142.649
Impact	ns	0.000327393	1472.95	1304.4	1034.92	1166.05	1612.11	1548.52
Inf2	0.0465253	9.5134e-12	1224.3	1327.63	1757.69	1678.85	993.654	968.467
Inha	ns	0.000194949	359.038	347.299	402.965	406.415	247.77	232.02
Ints6l	ns	0.0429573	130.458	153.323	147.114	158.523	93.9595	87.6519
Islr2	ns	0.0127553	288.791	325.23	322.372	255.339	176.979	184.756
Itfg1	ns	0.00161545	730.341	693.436	661.374	737.292	960.833	1041.51
Itm2b	ns	0.00968038	3065.2	2996.76	2784.94	3086.41	3639.32	3801.69
Itpr1	0.0465253	ns	838.499	908.32	1288.21	1127.75	1303.85	1290.72
Izumo4	ns	0.00466457	236.385	210.238	269.923	280.873	177.622	148.664
Josd2	ns	0.00326134	569.778	439.06	555.196	535.148	362.323	345.451
Kcnc3	ns	0.0397764	167.254	151	143.276	172.354	88.8111	99.6825
Kcnt1	ns	1.31053e-05	447.125	468.099	638.348	553.235	351.383	344.592
Kif1a	ns	0.0282491	2223.36	2382.31	2380.69	2227.83	1720.88	1930.06
Kif1bp	ns	0.00346941	538.557	533.144	451.577	421.309	630.044	631.609
Kifc2	ns	0.0401801	1004.64	1160.37	1312.51	1070.3	949.892	824.959
Klf9	ns	0.0473633	225.235	185.846	225.149	263.85	128.712	179.6
Klhdc2	ns	0.0407377	365.728	356.591	345.399	306.407	453.065	453.727
Klhl2	ns	0.0159427	602.113	652.783	599.97	597.919	804.448	812.928
Ldha	ns	0.047887	2299.18	2440.38	2209.27	2255.5	2686.86	2742.13
Lemd2	ns	0.0486033	163.909	192.815	222.59	265.978	150.593	166.71
Leng8	ns	4.26691e-05	152.758	166.099	249.455	234.061	116.484	115.15
Lgi4	ns	0.0410753	105.927	87.1151	143.276	142.564	78.5141	85.0739
Lingo3	ns	0.0272292	499.531	638.844	665.212	723.461	512.273	482.945
Lmo3	ns	0.0181727	582.043	634.198	633.231	542.596	814.102	793.163
Lmtk3	ns	0.00380943	367.958	416.991	413.199	518.126	324.354	243.191
Lrpprc	ns	0.0282051	417.019	399.568	489.954	430.885	324.354	328.265
Lrrc10b	ns	4.88016e-07	836.269	757.321	967.116	901.134	559.896	562.863
Lrrc17	ns	6.14229e-07	503.991	403.053	537.287	686.224	183.414	111.713
Lrrc45	ns	0.0400526	165.024	173.069	170.141	153.203	101.039	94.5265
Lrrc4b	ns	0.00162849	593.193	554.052	750.922	823.468	544.451	543.098
Lrrn3	ns	0.0034182	531.867	511.075	383.776	476.633	639.697	644.499
Luc7l2	ns	2.55841e-05	343.428	301.999	429.829	434.076	247.77	235.457
Lyrm9	ns	0.0289321	172.829	189.33	212.356	213.846	136.434	130.618
Macf1	ns	0.0322855	363.498	371.691	514.26	459.61	357.175	339.436
Maea	ns	0.0271935	354.578	351.945	275.04	298.959	414.452	407.323
Mag	ns	0.00155743	892.02	864.182	1045.15	879.856	650.638	683.169
Mal2	ns	0.0161315	277.641	339.168	267.364	279.809	396.432	425.369
Man2a2	ns	0.00758162	605.458	566.829	695.914	770.273	503.263	541.379
Manf	ns	0.049484	206.28	225.338	204.681	295.768	388.066	365.216
Map2k1	ns	1.71544e-05	2022.66	1969.96	1506.96	1950.15	2646.31	2694.01
Map2k7	ns	0.0411714	291.021	333.36	383.776	351.091	259.998	251.784
Mapk1ip1	ns	0.0183111	344.543	317.099	400.406	419.182	299.255	255.222
Mapre2	ns	7.48978e-05	820.658	787.521	752.201	694.735	1065.09	1093.93
Marf1	ns	0.0118269	114.848	112.669	53.7287	75.5378	151.88	114.291
Mast3	ns	0.00346941	1311.27	1247.49	1446.84	1445.86	1046.43	1120.57
Mat2b	ns	0.0150771	635.564	871.151	642.186	702.182	944.744	977.061
Matk	ns	9.26818e-05	1225.41	1304.4	1263.9	1282.01	860.438	903.158
Maz	ns	0.00201402	340.083	379.822	479.72	459.61	305.047	303.344
Mbd6	ns	0.000106992	157.219	160.292	218.752	234.061	106.187	115.15
Mbp	ns	1.18641e-05	11577.3	11707.1	14233	11034.9	8372.7	8418.88
Mcfd2	ns	2.55841e-05	346.773	394.922	295.508	329.813	555.391	532.786
Mchr1	ns	0.0462398	322.242	370.53	362.029	365.986	260.641	252.644
Mcu	ns	0.0473633	144.953	138.223	92.1063	79.7935	164.751	129.759
Mdh1	ns	0.000305616	4113.33	4577.61	4421.1	4351.4	5806.19	5858.93
Me3	ns	0.0184245	180.634	225.338	275.04	292.576	175.691	183.897
Med25	ns	0.000304404	379.108	382.145	468.207	437.268	287.027	265.534
Mef2c	ns	0.0492633	382.454	446.029	303.183	259.595	366.828	443.415
Megf8	ns	0.00458009	492.841	458.806	521.936	485.144	361.036	306.782
Mff	ns	0.0443795	826.233	846.759	812.326	760.698	1002.66	1007.14
Mgat5b	ns	0.0150754	209.625	242.761	275.04	276.617	178.909	170.148
Mgll	ns	0.0403884	1023.59	1051.19	1143.65	984.119	765.191	862.769
Mgp	0.0465253	ns	206.28	184.684	102.34	101.072	120.989	122.884
Miip	ns	0.0202266	70.2466	75.4998	121.529	98.9439	60.4945	45.5446
Mllt6	ns	0.00503089	464.965	499.46	528.332	528.765	331.433	384.121
Mobp	ns	0.0375765	3492.26	3056	4318.76	3038.53	2198.4	2284.1
Morf4l2	ns	8.70779e-05	223.005	210.238	298.066	262.786	521.926	461.461
Mpnd	ns	0.0251618	477.231	442.545	478.441	463.866	341.73	330.843
Mrpl54	ns	0.0322855	299.942	304.322	335.165	328.749	224.602	232.879
Msmo1	ns	0.030378	328.932	319.422	333.885	251.083	431.828	422.791
Mvb12a	ns	0.00741553	115.963	126.607	140.718	150.012	81.7319	67.0279
Myo18a	ns	0.00919874	385.799	448.352	550.079	523.445	378.412	358.341
Mzf1	ns	0.0202266	119.308	98.7305	118.971	118.094	68.8608	51.5599
Mzt1	ns	0.00437025	219.66	249.73	200.843	238.316	353.314	360.919
Naca	ns	0.000289134	903.17	907.159	996.539	955.394	1344.39	1420.48
Ncdn	ns	0.00198914	7477.36	6828.66	7990.22	8924.1	6758.65	5986.11
Ndn	ns	0.0443629	2650.41	2403.22	2288.59	2442.74	2935.91	2880.48
Ndrg4	ns	0.00188191	9506.7	10379.5	9137.71	9528.4	11538.4	12515.3
Ndufc2	ns	0.0238906	1089.38	1122.04	945.369	995.822	1177.07	1376.65
Necap1	ns	0.00197801	586.503	622.583	588.457	639.412	940.239	835.271
Nedd4	ns	0.000555212	937.736	895.543	777.786	830.916	1151.97	1133.46
Nexn	ns	0.00812023	121.538	137.061	195.726	217.038	120.345	113.432
Nlgn2	ns	0.0118871	549.707	638.844	676.725	723.461	523.857	468.336
Nnat	ns	0.0348275	3503.41	3630.96	3917.08	4152.45	3467.49	3043.75
Nr1d1	ns	0.000817351	322.242	343.814	337.723	386.2	211.731	222.567
Nr4a3	ns	0.0264579	94.7771	82.469	85.71	90.4326	166.038	150.383
Nrbp2	ns	0.00902519	205.165	207.915	252.013	202.143	122.276	142.649
Nrgn	ns	0.0447133	2434.1	2399.73	2548.27	2488.49	2085.13	2062.4
Ogt	ns	0.023284	723.651	645.813	922.342	925.604	725.29	659.108
Olfm3	ns	0.0062189	302.172	324.068	235.383	228.741	399.006	333.421
Omg	ns	0.0016909	461.62	466.937	460.531	357.475	617.816	642.78
Ost4	ns	0.00856988	626.644	569.152	693.356	589.408	476.233	396.152
Ostc	ns	0.0397764	282.101	265.991	248.175	256.403	359.749	365.216
Otud7b	ns	0.0308896	117.078	99.892	156.069	136.181	88.1675	74.7619
Oxct1	ns	0.0397764	795.013	817.721	839.191	785.168	977.565	1155.8
Pabpc1	ns	0.00256177	517.372	494.814	610.204	572.385	420.887	374.669
Palm	ns	0.00598117	896.48	893.22	1279.25	1059.66	725.29	904.017
Pcbp1	ns	0.0411714	637.794	601.675	615.321	587.28	802.518	771.68
Pcdh17	ns	0.0422831	171.714	134.738	207.239	198.952	135.147	114.291
Pcp4l1	ns	0.00351308	2734.04	2690.11	3219.88	3264.08	2611.56	2450.82
Pcsk1n	ns	9.26818e-05	7154	6855.38	7197.08	7667.62	5506.29	5658.7
Pdcd6	ns	0.0124475	374.648	452.999	351.795	438.332	554.747	627.312
Pde1a	ns	0.0338993	530.752	687.629	473.324	512.806	708.558	663.404
Pde1b	ns	0.00394577	4064.27	4255.86	4959.67	5249.35	4055.06	4027.69
Pdhb	ns	0.0355845	728.111	693.436	639.627	661.754	812.171	903.158
Pdia6	ns	4.91692e-09	341.198	398.406	354.353	344.708	655.143	781.133
Pdlim7	ns	0.0202266	469.425	455.322	536.007	646.859	411.234	430.525
Pdp1	ns	2.55841e-05	405.869	374.014	370.984	359.603	621.034	599.814
Pfdn4	ns	0.0162901	147.183	161.453	139.439	152.14	227.176	256.081
Pgrmc1	ns	0.00725197	795.013	760.805	749.643	869.217	1127.51	1088.77
Phldb1	ns	0.00142298	294.367	299.676	359.47	296.832	195.642	192.49
Phyhip	ns	0.00206189	2009.27	1893.3	2229.74	2300.18	1780.08	1639.61
Phyhipl	ns	0.00697542	952.231	1111.59	921.063	854.322	1307.71	1147.21
Pik3c2b	ns	0.00793392	63.5564	66.2075	115.133	114.903	61.7816	38.6699
Pip4k2c	ns	0.0184245	142.723	189.33	158.627	119.158	243.909	229.442
Pitpnm2	ns	1.66932e-09	1368.14	1305.57	1609.3	1541.61	980.14	820.662
Pja1	ns	0.00604426	766.022	866.505	697.193	821.341	1088.26	1037.21
Pja2	ns	0.0316532	1498.59	1494.9	1262.62	1264.99	1612.11	1551.09
Pkd1	ns	1.51594e-05	269.836	219.53	309.579	363.858	144.801	181.319
Plec	ns	9.26818e-05	430.4	407.699	442.622	435.14	229.107	279.283
Plekhn1	ns	0.00780691	233.04	228.822	271.202	291.512	182.771	164.992
Plp1	ns	0.000555212	6915.38	6450	8517.27	7244.18	5429.06	6041.1
Plxnb1	ns	0.0382034	188.439	199.784	354.353	247.892	176.979	204.521
Plxnc1	ns	0.000505109	130.458	134.738	97.2233	110.647	207.869	214.833
Plxnd1	ns	0.0140361	186.209	249.73	273.76	361.73	202.721	180.46
Pomp	ns	0.0119748	1288.97	1225.42	1216.57	1190.52	1487.26	1665.39
Pou6f1	ns	0.0270279	127.113	112.669	177.816	160.651	109.405	80.7772
Ppfia4	ns	0.000912518	375.763	344.976	456.694	467.058	306.334	269.83
Ppia	8.39173e-06	0.0139133	190.669	196.299	382.497	391.52	515.49	628.172
Ppp1cb	ns	0.000135944	1355.87	1439.14	1283.09	1317.12	1948.05	1753.04
Ppp1r14a	ns	0.0219623	236.385	242.761	331.327	223.422	162.82	175.304
Ppp1r1b	ns	0.0127797	6894.2	6844.92	8164.2	8697.49	7016.08	6719.98
Ppp1r9b	ns	2.06845e-10	4382.05	4325.56	5086.31	4709.94	3213.93	2819.47
Ppp2r1a	ns	0.00197801	2459.74	2557.7	2233.58	2035.27	2740.92	2878.76
Ppp2r5b	ns	0.000290835	1140.67	892.059	1019.57	1007.53	684.103	631.609
Prelid1	ns	0.0251618	607.689	693.436	507.864	515.998	675.093	717.542
Prkacb	ns	0.000161653	1955.75	2023.39	1583.72	1801.2	2279.48	2545.34
Prkcg	ns	0.0110069	670.13	827.013	983.746	908.582	734.944	543.957
Prmt8	ns	0.0483797	479.461	428.606	424.712	409.606	319.849	275.846
Prnp	ns	3.78879e-06	2915.79	2695.92	2392.2	2506.58	3518.98	3486.31
Prr12	ns	0.0350098	287.676	290.384	359.47	387.264	287.671	204.521
Prrc2a	ns	0.00960369	935.506	938.52	1052.83	1028.8	832.765	653.952
Psma2	ns	6.02661e-05	607.689	692.275	492.513	558.554	789.003	929.797
Psmb4	ns	0.0277384	950.001	1029.12	812.326	830.916	1004.59	1166.97
Ptbp1	ns	0.0256839	103.697	126.607	172.699	145.756	90.7418	88.5112
Ptdss1	ns	0.0451616	181.749	160.292	168.862	147.884	229.75	262.096
Ptges3	ns	0.00199884	276.526	300.838	273.76	262.786	411.234	440.837
Ptn	ns	0.0299561	666.785	676.013	593.574	673.457	852.072	829.255
Ptprn	ns	0.0162901	2535.57	2679.66	3138.01	3342.81	2694.58	2434.49
Pura	ns	0.0182975	500.646	419.314	478.441	613.878	370.69	374.669
R3hdm4	ns	0.00358406	1155.17	1343.9	1426.37	1366.06	1035.49	1011.43
Rab11a	ns	0.0365954	546.362	554.052	464.369	443.652	595.292	623.875
Rab14	ns	0.00153964	1072.65	1127.85	944.089	1039.44	1358.55	1374.07
Rab18	ns	0.0182975	370.188	419.314	346.678	357.475	541.233	473.492
Rab34	ns	0.0389414	108.157	87.1151	129.205	143.628	75.9399	77.3399
Rab6a	ns	0.00998464	1844.25	1946.73	1510.8	1396.92	1922.31	1830.38
Rabggtb	ns	0.00364474	352.348	308.968	269.923	311.726	450.491	455.446
Rabl6	ns	0.00832377	1014.67	1045.38	1015.73	990.503	732.37	769.102
Rae1	ns	0.00585094	238.615	248.568	254.572	258.531	156.385	155.539
Raly	5.12006e-09	1.35251e-06	292.137	268.315	72.9175	112.775	239.404	225.145
Ran	ns	0.00197801	566.433	548.244	433.667	522.381	687.321	743.322
Rap1gap	ns	0.000350594	2100.71	1990.87	2108.21	2136.34	1587.02	1545.94
Rasal1	ns	0.000345976	392.489	328.714	409.361	391.52	229.75	243.191
Rasd2	ns	5.79908e-06	2295.84	2373.02	2745.28	2623.61	1888.84	1885.37
Rasl10b	ns	1.84353e-10	2466.43	2468.26	3091.96	3082.16	2004.04	1912.01
Rbck1	ns	0.00217037	645.599	672.529	832.794	745.803	558.609	540.52
Rbfox1	ns	0.00777617	877.525	981.497	827.677	877.728	1095.98	1241.73
Reep2	ns	0.00137395	852.994	932.712	836.632	908.582	625.539	590.361
Retreg3	ns	0.0207155	101.467	116.153	60.1249	71.2822	135.791	117.728
Rgl2	ns	0.0186064	169.484	233.468	228.986	230.869	144.801	129.759
Rgs11	ns	3.40604e-05	110.387	106.861	190.609	191.504	74.6528	88.5112
Rgs2	ns	0.0162581	884.215	926.905	859.659	1039.44	1292.27	1252.91
Rgs9	0.0465253	0.000246617	1045.89	1111.59	1489.05	1433.09	1009.1	1060.42
Rheb	ns	0.00254527	974.532	983.82	814.885	899.006	1294.84	1113.69
Rhog	ns	0.00503044	219.66	197.461	211.077	209.591	123.563	117.728
Rin1	ns	0.00240113	447.125	498.298	509.143	524.509	361.68	316.234
Rit2	ns	0.0184245	619.954	583.09	502.747	600.047	769.052	751.916
Rnf11	ns	0.00613211	860.799	961.751	837.911	748.995	1115.29	1062.13
Rnf112	ns	0.0433717	576.468	738.736	927.459	925.604	716.281	665.982
Rnf123	ns	0.0443629	179.519	193.976	182.933	192.568	119.058	118.588
Rnf34	ns	0.0441925	259.801	263.668	226.428	223.422	323.066	327.406
Rnf7	ns	0.0320443	425.939	390.276	385.055	420.246	547.668	563.722
Rpl10	ns	0.00988209	447.125	401.891	484.837	620.261	727.221	946.125
Rpl27	ns	0.0118269	820.658	753.836	607.646	645.795	795.438	957.296
Rpl3	ns	0.0159427	3001.65	2758.65	2654.45	2770.43	3174.67	3991.6
Rpl38	ns	0.00162849	4735.51	4445.19	4511.93	4325.87	3228.73	3540.45
Rpn1	ns	0.0441925	419.249	450.676	344.119	386.2	510.985	492.397
Rps4x	ns	0.0397764	619.954	588.898	570.547	607.494	708.558	910.033
Rps6	0.0465253	ns	150.528	118.477	209.798	295.768	270.938	353.185
Rps6kb2	ns	0.00610335	154.988	124.284	177.816	158.523	83.6626	93.6672
Rps7	ns	0.0125666	1488.56	1558.78	1485.21	1450.11	1757.56	2163.8
Rsrp1	ns	0.0469461	1634.63	1465.86	1623.37	1699.07	1386.87	1243.45
Rtkn	ns	0.0299561	247.536	293.868	322.372	290.448	211.731	193.35
Rtn2	ns	0.0322358	473.886	461.129	561.593	496.847	382.274	385.84
Ryr1	ns	0.0148122	82.5118	88.2766	110.016	139.373	60.4945	65.3092
Ryr3	ns	0.00793392	284.331	226.499	326.21	328.749	201.434	208.818
Safb2	ns	0.00395174	293.252	234.63	330.048	376.625	204.652	226.864
Saraf	ns	0.020783	910.975	909.482	880.127	866.025	1116.57	1145.49
Sbf1	ns	0.0111386	573.123	580.767	633.231	600.047	408.66	466.617
Scand1	ns	0.00346792	315.552	268.315	278.877	313.854	177.622	180.46
Scd2	ns	0.0270071	3061.86	2925.91	3259.54	2963	3732	3984.72
Scg2	ns	1.07387e-11	2263.5	2411.35	1922.72	2094.84	3309.18	3341.94
Scn4b	ns	0.0430352	1539.85	1642.41	1879.22	1837.38	1419.05	1561.41
Scn8a	ns	0.00607723	532.982	522.691	585.898	572.385	393.858	415.917
Scrt1	ns	0.0192052	231.925	305.484	286.553	236.189	182.127	116.01
Scrt2	ns	0.00113634	85.8569	109.184	163.745	156.395	80.4448	65.3092
Sdcbp	ns	0.000539062	597.653	633.036	591.015	661.754	909.992	939.25
Sdf2l1	ns	0.0270279	61.3264	77.8228	71.6382	70.2182	166.682	113.432
Sec22b	ns	0.00961796	345.658	378.66	291.67	327.685	483.312	440.837
Sec23a	ns	0.0188915	444.895	399.568	356.912	334.069	530.936	462.321
Selenok	ns	0.0430274	973.417	997.758	938.972	1018.16	1260.09	1221.11
Selenot	ns	0.0152162	477.231	449.514	409.361	451.099	575.341	644.499
Sema5b	ns	6.74667e-07	158.334	151	276.319	219.166	108.118	85.0739
Sez6	ns	0.025401	2269.08	2496.14	2663.41	2460.83	2002.75	2078.72
Sez6l	ns	0.0159427	249.766	195.138	112.574	129.797	185.988	238.894
Sf3b1	ns	0.0208152	917.665	924.582	1129.58	1054.34	863.656	806.053
Sgce	ns	0.0472449	181.749	181.199	150.952	161.715	229.75	250.066
Sh2d5	ns	0.0338316	704.696	775.905	1057.94	976.672	828.903	693.481
Shisa7	ns	0.00200114	553.052	485.522	588.457	533.02	375.195	366.935
Skp1a	ns	0.0229153	1214.26	1120.88	1060.5	1124.56	1494.99	1342.28
Slc12a9	ns	0.0114649	146.068	134.738	161.186	158.523	81.7319	94.5265
Slc24a2	ns	0.0365954	947.771	1130.17	1118.07	936.243	782.567	751.916
Slc25a4	ns	0.00215686	3774.36	4038.66	3299.2	3487.51	4371.69	4358.53
Slc38a3	ns	0.00908674	422.594	421.637	372.263	386.2	250.344	259.518
Slc39a10	ns	0.0338993	120.423	159.13	129.205	130.861	219.453	207.958
Slc4a3	ns	0.00159009	628.874	695.759	715.103	719.205	458.214	517.318
Slc5a7	ns	0.0345194	86.9719	84.792	67.8005	73.41	133.217	126.322
Slc6a6	ns	0.000937043	266.491	295.03	287.832	306.407	164.107	180.46
Slc6a8	ns	0.0308421	277.641	253.215	379.938	304.279	227.176	229.442
Smarcd3	ns	0.00426963	986.797	1083.71	1125.74	1209.67	864.943	854.176
Snap25	ns	0.00818085	5305.29	6014.43	5512.31	4933.36	6874.49	6549.83
Snap47	ns	0.000912518	1058.16	1220.77	999.097	1075.62	1475.68	1447.97
Snap91	ns	0.0045558	643.369	720.152	534.728	526.637	774.201	729.573
Snhg11	ns	9.06475e-23	4535.92	4066.53	5699.08	5687.68	2874.13	2374.33
Snrnp70	ns	2.82978e-14	708.041	634.198	908.27	846.875	426.036	381.543
Snrpd3	ns	0.0428484	351.233	351.945	241.779	252.147	349.452	353.185
Snx3	ns	0.00153759	910.975	945.489	910.829	939.435	1231.13	1330.25
Son	ns	0.0132889	961.151	987.305	1134.7	1011.78	839.844	757.072
Sox4	ns	0.0463005	86.9719	90.5997	157.348	122.35	79.8013	78.1992
Spaca6	ns	5.90595e-05	104.812	127.769	197.005	143.628	60.4945	73.0432
Spcs1	ns	0.0234091	761.562	777.067	784.183	817.085	1000.73	1106.82
Spin1	ns	0.00159009	170.599	188.169	185.492	198.952	312.126	351.467
Sptbn2	ns	0.000149088	1675.88	1634.28	1821.66	1784.18	1130.73	1355.17
Sptbn4	ns	6.75132e-05	681.28	758.482	928.738	851.13	603.658	520.755
Sqstm1	ns	2.55841e-05	2593.55	2601.84	2023.78	2101.23	2791.76	2968.13
Srcin1	ns	0.0251618	457.16	544.76	588.457	439.396	344.304	353.185
Srebf1	ns	0.0224344	272.066	278.768	258.409	255.339	178.909	150.383
Srgap1	ns	0.0136507	129.343	164.938	194.447	201.08	119.702	106.557
Srp9	ns	0.0110069	268.721	286.899	298.066	272.362	418.313	433.963
Srrm2	ns	0.00133569	449.355	500.622	542.404	659.626	368.115	404.745
Srsf3	ns	0.0184616	745.952	853.728	835.353	741.547	1091.48	1026.04
Srsf5	ns	1.66932e-09	1185.27	1067.45	1193.54	1242.65	727.865	659.108
Ssbp4	ns	0.00123808	953.346	908.32	979.909	1035.19	757.468	610.985
Ssr3	ns	0.0282491	543.017	473.906	488.675	559.618	736.231	700.356
Ssu72	ns	0.0240221	771.597	868.828	676.725	670.265	855.933	945.265
St13	ns	0.00113634	424.824	408.86	405.524	444.716	663.509	623.875
St6galnac6	ns	0.0162546	653.405	693.436	825.119	736.228	569.549	578.33
Stim1	ns	0.0198733	385.799	360.076	469.486	469.186	334.007	327.406
Stip1	ns	0.0301429	724.766	773.582	752.201	685.16	940.239	940.969
Stxbp2	ns	6.62336e-06	196.244	232.307	327.489	251.083	132.573	128.9
Sub1	ns	0.00268832	2011.5	2058.24	1733.39	1783.12	2242.8	2337.38
Sucla2	ns	0.0184245	646.714	671.367	597.412	533.02	780.637	750.197
Sugp1	ns	0.0409403	297.712	268.315	313.417	313.854	231.038	192.49
Sumo1	ns	0.0202266	196.244	219.53	173.979	178.737	277.374	274.127
Sun2	ns	0.00449313	268.721	259.022	373.542	329.813	217.523	225.145
Syndig1l	0.0465253	0.0100956	761.562	749.19	1004.21	1118.17	825.686	733.87
Synj2bp	ns	0.0118269	208.51	176.553	149.673	153.203	229.75	281.002
Syt7	ns	0.00237931	680.165	761.967	724.058	693.671	466.58	511.303
Szt2	ns	0.00519821	107.042	83.6305	141.997	113.839	65.643	50.7006
Tagln3	ns	1.85e-08	1292.31	1127.85	950.486	1050.08	1650.08	1707.49
Tbkbp1	ns	0.000135944	296.597	313.614	314.696	313.854	172.474	177.882
Tceal1	ns	0.00902519	152.758	188.169	135.601	136.181	231.038	235.457
Tceal9	ns	0.0322855	493.956	526.175	400.406	494.719	609.45	631.609
Tcp1	ns	0.0118269	704.696	646.975	637.068	711.758	903.556	937.531
Tctn1	ns	0.00153964	98.1222	68.5306	136.88	124.478	52.1282	59.2939
Tecr	ns	0.000912518	2846.66	2632.04	2660.85	2843.84	2071.61	2064.12
Tenm4	ns	0.0230169	488.381	441.383	519.377	477.697	363.611	343.733
Them6	ns	0.0405937	188.439	196.299	175.258	211.719	139.009	85.0739
Tmco1	ns	0.0268146	260.916	212.561	231.545	203.207	336.581	323.968
Tmem191c	ns	0.00503089	718.076	665.559	741.967	834.108	526.431	585.205
Tmem234	ns	0.00256177	392.489	365.883	417.037	480.889	261.928	309.36
Tmem30a	ns	2.55841e-05	880.87	1066.29	866.055	863.897	1301.92	1380.95
Tmem33	ns	0.0136507	424.824	422.799	387.614	408.543	553.46	571.456
Tmem47	ns	0.0270279	564.203	508.752	518.098	580.896	779.349	716.683
Tmem50b	ns	0.0403671	438.205	523.852	428.55	451.099	579.203	629.031
Tmem59	ns	0.00102564	925.471	815.397	808.489	817.085	1126.87	1183.3
Tmem63b	ns	0.000379442	328.932	327.553	319.813	330.877	196.285	181.319
Tmsb4x	ns	0.000168671	6587.57	6503.43	5314.02	5406.8	6847.46	7235.58
Tpgs1	ns	0.0450261	485.036	472.745	506.585	537.276	350.739	413.339
Trim46	ns	0.000286857	479.461	527.337	569.268	601.111	360.393	384.981
Tsc2	ns	0.0282491	433.745	380.983	533.449	493.656	364.254	370.372
Tspan7	ns	0.000117558	4108.87	4027.04	4073.14	4407.79	5620.84	5736.04
Tspoap1	0.0465253	2.95776e-07	506.221	476.229	711.265	713.885	388.709	421.073
Tspyl5	ns	0.000901988	141.608	142.869	113.854	135.117	230.394	249.206
Ttbk1	ns	0.0389576	231.925	326.391	317.255	337.26	208.513	222.567
Ttyh3	ns	0.000507025	615.494	601.675	689.518	659.626	474.946	396.152
Tubb2a	ns	0.0365954	3008.34	3276.69	2573.86	2176.77	2914.68	3080.71
Tusc3	ns	1.32026e-06	468.31	449.514	418.316	477.697	743.31	824.099
Uap1	ns	0.0188915	90.317	78.9844	61.4042	41.4926	93.316	128.04
Ube2b	ns	0.0299561	1456.22	1390.36	1345.78	1356.49	1749.19	1646.48
Ube2m	ns	0.044168	926.586	991.951	1087.37	1059.66	803.805	875.659
Ube2n	ns	0.00120323	307.747	310.13	276.319	274.489	451.778	426.229
Ube2ql1	0.0465253	1.00667e-05	400.294	538.952	299.345	279.809	509.698	596.376
Ubl3	ns	0.0151261	1068.19	1033.77	1188.43	1042.63	1473.11	1442.82
Ubr5	ns	0.0424887	316.667	270.638	346.678	322.366	238.76	219.989
Uqcrc2	ns	0.0104468	675.705	767.775	695.914	729.844	956.328	983.935
Usp2	ns	0.00863008	683.51	566.829	608.925	640.475	466.58	376.387
Usp22	ns	0.0251763	543.017	626.067	500.188	555.362	724.003	718.402
Usp3	ns	0.0162581	218.545	242.761	290.391	296.832	187.919	191.631
Vapa	ns	0.00268832	501.761	465.775	431.109	398.967	568.262	696.918
Vat1l	ns	0.0337058	574.238	542.437	374.821	570.257	676.38	702.934
Vps35	ns	0.00256177	539.672	548.244	524.494	508.55	716.281	769.102
Vsnl1	8.39173e-06	2.36452e-08	1363.68	1259.1	872.451	781.976	1346.32	1413.6
Vstm2a	ns	0.0158978	503.991	511.075	354.353	421.309	561.183	543.098
Vstm2l	ns	0.00392678	1713.79	1710.94	1441.72	1666.09	1218.9	1026.04
Wbp2	ns	0.025233	1205.34	1166.18	1115.51	1225.63	1448.65	1561.41
Wdr45b	ns	0.044168	246.42	189.33	213.635	217.038	315.344	329.124
Xbp1	ns	4.21833e-06	317.782	320.584	335.165	359.603	601.084	617.86
Yaf2	ns	0.0036915	323.357	386.791	262.247	263.85	417.026	407.323
Ywhag	ns	0.000299149	1846.48	1958.35	1766.65	1728.86	2386.96	2351.13
Ywhah	ns	0.000555212	682.395	682.982	591.015	557.49	798.013	920.345
Ywhaq	ns	0.000207158	1332.45	1455.4	1229.36	1302.23	1727.95	1857.88
Zbtb20	ns	0.000242319	733.686	653.944	626.834	653.242	400.937	426.229
Zcchc12	ns	0.0126383	1435.04	1218.45	1150.05	1325.64	1742.76	1594.06
Zfhx2	ns	0.0210377	220.775	198.622	291.67	328.749	213.018	189.053
Zfp219	ns	0.00801558	140.493	125.446	209.798	237.253	133.86	122.884
Zfp385a	ns	0.0257648	210.74	231.145	307.021	293.64	207.869	186.475
Zfp445	ns	0.0174908	796.128	641.167	876.289	802.19	639.054	555.129
Zfp580	ns	0.0251618	274.296	265.991	257.13	295.768	184.701	177.882
Zfp651	ns	0.0397764	350.118	277.607	354.353	307.471	210.444	233.738
Zfp692	ns	0.0338492	127.113	105.7	167.582	163.843	93.316	101.401
Zfp771	ns	0.0125929	350.118	382.145	390.172	402.159	250.988	282.72
Zfp931	ns	0.0125666	79.1668	61.5613	42.2154	54.2596	111.979	102.261
Zfr2	ns	0.0104421	204.05	235.792	221.311	276.617	148.662	150.383
Zrsr1	ns	0.0443795	287.676	265.991	213.635	297.896	399.006	363.497
Zwint	ns	7.9971e-08	4621.78	4862.18	4120.48	4379.06	6082.92	6347.89

## Sheet: LCtx
Supplementary Table S2: Normalized reads of baseline shifted genes (limbic cortex)
SYMBOL	p.adj_Acute_Repeated	p_adj_Acute_Challenge	counts_Repeated_0h	counts_Repeated_0h.1	counts_Acute_0h	counts_Acute_0h.1	counts_Challenge_0h	counts_Challenge_0h.1
Acot13	ns	0.0418498	447.837	494.845	497.287	436.299	632.175	659.577
Acot7	ns	0.00222715	1256.15	1382.61	1303.68	1392.14	1780.26	1908.83
Actb	ns	0.00236175	5825.9	5353.04	5240.33	6169.37	4375.57	4043.88
Adamts10	ns	0.0437514	54.2224	52.1298	62.4611	66.1971	26.6434	25.4172
Adcy1	ns	0.000293283	1226.03	1070.61	1422.99	1240.69	945.84	804.455
Adcy5	ns	0.0410882	466.915	445.827	349.142	349.039	530.446	454.968
Adgre5	ns	0.000176182	36.1483	28.0101	72.0705	92.2747	23.0102	15.2503
Akt1s1	ns	5.31545e-05	187.77	172.729	83.2815	117.349	227.68	216.046
Alas2	1.06698e-22	1.60929e-18	5.0206	10.1147	170.567	286.854	9.6885	5.08344
Aldoa	ns	3.65457e-05	5711.43	6331.05	6345.41	6468.26	8708.75	8906.19
Alox5ap	ns	0.0018678	26.1071	27.232	54.4533	75.224	7.26638	21.6046
Anapc13	ns	0.0288515	254.042	186.734	217.813	202.603	351.208	316.444
Ap2b1	ns	0.0282079	496.035	670.685	415.607	506.508	726.638	640.514
Apc	ns	0.00665745	492.018	519.742	523.713	496.478	329.409	358.383
Apoe	ns	0.000128813	9906.64	8783.49	7518.56	9105.11	12027.1	11788.5
Aqp4	ns	0.032105	145.597	179.731	130.528	145.433	260.379	203.338
Arhgap45	1.2321e-07	0.000262532	20.0824	21.7856	96.094	137.409	27.8544	40.6675
Arhgdib	0.0342696	ns	41.1689	31.9004	80.8792	108.322	42.3872	49.5636
Arhgef1	ns	0.00851777	130.535	73.1374	146.543	170.508	82.3523	57.1887
Arhgef10l	ns	0.0282079	179.737	182.843	220.216	210.627	141.694	116.919
Arhgef11	ns	2.88382e-05	169.696	245.088	239.434	227.678	104.151	95.3146
Arid4b	ns	0.0179515	151.622	129.158	162.559	150.448	92.0408	74.9808
Arl3	ns	0.0139075	449.845	405.368	429.22	392.168	641.863	555.366
Atf7ip	ns	0.0362032	114.47	146.275	158.555	181.54	105.362	82.6059
Atox1	ns	0.0142999	431.771	409.258	412.404	488.454	621.275	677.369
Atp11b	ns	0.000111224	215.886	214.744	207.403	189.564	66.6085	108.023
Atp2b2	ns	0.0388193	1680.9	1280.68	1406.98	1236.68	931.307	992.542
Atp5b	ns	0.0331903	3677.08	3621.08	3589.91	3472.34	4224.19	4495.03
Atp5e	ns	2.09327e-10	1666.84	1575.57	1277.25	1469.37	2314.34	2376.51
Atp5h	ns	1.62648e-08	1680.9	1573.23	1629.59	1546.6	2410.02	2681.52
Atp5j	ns	0.019152	1335.48	1211.44	1428.6	1119.33	1693.07	1803.35
Atp5j2	ns	0.00666075	1781.31	1679.83	1874.63	1795.35	2268.32	2630.68
Atp5k	ns	3.25757e-11	1771.27	1654.15	1445.41	1363.06	2345.83	2385.41
Atp5o	ns	0.00518086	1449.95	1331.26	1267.64	1305.89	1666.42	1781.75
Atp6ap1l	ns	0.0166602	47.1936	73.1374	56.8556	40.1194	108.996	114.377
Aurkaip1	ns	0.0236863	394.619	415.483	395.587	351.045	525.601	542.658
B230219D22Rik	ns	0.00519311	393.615	387.473	442.833	425.266	290.655	275.777
Bola2	ns	0.00116615	395.623	414.705	381.974	431.284	582.521	692.619
C1qb	ns	0.000421854	392.611	368.799	351.544	356.06	544.978	576.971
C1qc	ns	0.00511276	437.796	408.48	365.157	352.048	519.546	550.283
Cadm2	ns	0.00886253	923.79	822.407	946.526	745.219	584.943	578.242
Caly	ns	0.0273225	1429.87	1572.45	1503.87	1461.35	1881.99	1917.73
Camk2g	ns	0.021024	608.496	550.087	664.65	519.547	371.796	430.822
Carf	ns	0.0134356	47.1936	53.686	70.469	54.1612	21.7991	20.3338
Carhsp1	ns	0.0428775	86.3542	79.3619	48.8478	48.1433	95.674	99.1271
Cartpt	ns	1.70814e-06	90.3707	52.9079	28.0274	29.0866	98.0961	146.149
Cavin3	ns	0.00830671	185.762	207.741	145.743	139.415	226.469	263.068
Cbfa2t3	ns	0.0261432	124.511	137.716	137.735	163.487	299.133	214.775
Ccl5	2.00199e-05	ns	1.00412	6.22446	47.2462	70.209	6.05531	6.3543
Ccl6	7.20401e-06	6.59961e-07	11.0453	10.8928	72.0705	90.2687	3.63319	11.4377
Cct3	ns	0.000666713	409.681	399.922	339.532	377.123	581.31	545.199
Cct7	ns	5.31545e-05	679.789	659.015	677.463	567.69	1000.34	962.042
Cd24a	ns	0.022664	20.0824	41.237	58.4572	62.1851	18.1659	19.0629
Cd52	3.74314e-05	ns	41.1689	31.9004	106.504	135.403	76.297	71.1682
Cd74	5.04961e-14	3.34797e-06	7.02883	12.4489	106.504	163.487	29.0655	30.5007
Cd9	0.00188304	0.0111768	116.478	97.2572	205.001	241.72	107.785	135.982
Cdkn1a	ns	0.000344309	214.882	243.532	192.989	225.672	396.018	350.758
Cds2	ns	0.00355986	1518.23	1728.07	1682.45	1842.49	1369.71	1089.13
Celf2	ns	0.0352917	1460.99	1330.48	1420.59	1310.9	1066.95	1037.02
Chchd10	ns	0.0356426	2788.44	2487.45	2603.35	2438.26	3160.87	3196.21
Chrm3	ns	0.0397808	171.704	172.729	217.012	170.508	105.362	123.273
Cisd3	ns	0.0337462	79.3254	71.5813	64.8635	48.1433	121.106	108.023
Cmtm5	ns	0.00283207	146.601	133.826	122.52	118.352	209.514	237.651
Cnpy2	ns	0.0365376	176.725	196.07	178.575	148.442	260.379	260.526
Cntn1	ns	0.00628815	1097.5	1140.63	1338.91	1195.56	910.719	948.062
Cops9	ns	0.000155119	1431.87	1272.9	1189.96	1143.4	1601.03	1830.04
Cox17	ns	0.000218847	683.805	666.017	562.951	565.684	804.146	915.02
Cox20	ns	0.000421854	145.597	154.055	140.137	124.37	250.69	259.256
Cox5b	ns	2.17666e-08	1917.87	1857.22	1890.65	1861.54	2797.56	2971.27
Cox7a2	ns	0.0437514	2586.61	2503.01	2439.19	2286.81	2747.9	3319.49
Cox7c	ns	3.92665e-06	1363.59	1375.61	1370.94	1146.41	1911.06	2000.33
Cox8a	ns	3.11779e-08	2943.07	2581.59	2724.27	2669.95	4025.57	4578.91
Cpne6	ns	0.0408542	675.772	885.429	702.287	813.422	1051.2	1051
Csf3r	0.0198295	ns	9.03707	8.55863	32.8321	55.1642	21.7991	21.6046
Cst3	ns	4.21568e-05	14282.6	12234.2	12155.1	12245.5	16383.3	18447.8
Ctla2a	5.01983e-22	3.80024e-22	58.2389	50.5737	607.795	849.529	36.3319	63.543
D8Ertd738e	ns	0.000933534	415.705	351.682	361.153	356.06	528.023	629.076
Dad1	ns	0.0151246	774.176	791.284	717.502	780.323	945.84	1114.54
Dapk3	ns	0.0385506	129.531	112.04	82.4807	68.2031	132.006	144.878
Dbi	ns	1.0212e-08	1769.26	1646.37	1464.63	1472.38	2257.42	2407.01
Dbp	ns	1.88214e-05	559.294	605.329	610.197	561.672	326.987	362.195
Dctn1	ns	0.0336326	132.544	126.823	162.559	158.472	300.344	226.213
Dmxl2	ns	0.0215877	454.866	466.056	539.728	491.463	336.676	379.987
Dnajc21	ns	0.0163994	150.618	121.377	139.336	87.2598	42.3872	59.7305
Dock3	ns	0.0464258	489.006	461.388	592.58	555.654	443.249	383.8
Dpm3	ns	0.0236658	205.844	153.277	145.743	153.457	241.002	259.256
Dtx3	ns	0.00610465	239.984	245.866	233.028	218.651	379.063	341.862
Dusp6	ns	0.00869076	151.622	122.933	200.196	149.445	83.5633	94.0437
Dusp7	ns	0.00472299	326.339	302.664	264.259	315.941	176.815	166.483
Dynll1	ns	0.000335391	1795.37	1977.04	1848.21	1794.34	2420.91	2663.72
Efnb3	ns	0.0457823	152.626	190.624	204.2	215.642	334.253	308.819
Elob	ns	1.63571e-09	1137.67	1116.51	1187.56	1148.42	1879.57	1932.98
Eno1	ns	2.30268e-15	199.82	211.632	264.259	285.851	686.673	669.744
Epb41	0.0482547	7.20267e-06	59.243	42.7932	112.11	125.373	33.9098	27.9589
Epb41l3	ns	0.0294026	328.347	283.991	287.481	321.959	209.514	181.733
Erc2	ns	0.0037391	593.434	585.099	610.998	520.55	363.319	387.613
Etl4	ns	4.3255e-05	263.079	255.203	314.708	331.988	174.393	163.941
Fabp5	ns	0.0414873	188.774	157.946	202.598	176.526	307.61	284.673
Fabp7	ns	8.66301e-05	109.449	156.39	79.2776	138.412	264.012	264.339
Fau	ns	2.30178e-25	1195.91	1142.19	1281.25	1260.75	2653.44	2889.94
Fkbp2	ns	0.0151128	918.769	893.21	805.588	839.499	1085.11	1104.38
Flnb	ns	0.0139075	132.544	91.8108	120.118	91.2717	43.5983	49.5636
Fmc1	ns	0.0062807	289.186	229.527	238.634	228.681	368.163	387.613
Frrs1l	ns	0.00137447	841.452	797.509	974.554	790.353	541.345	620.18
Ftl1	ns	5.40506e-07	793.254	774.167	846.428	974.902	1493.24	1443.7
Fxyd5	ns	0.045284	98.4037	115.152	140.938	189.564	90.8297	91.502
Gaa	ns	0.0268399	1026.21	1052.71	1039.42	1095.26	1482.34	1315.34
Gabarapl1	ns	0.0483961	1582.49	1792.64	1602.37	1644.9	2098.77	2016.86
Gapdh	ns	3.40858e-08	323.326	417.817	466.857	467.392	871.965	904.853
Gfap	ns	0.000101316	208.857	200.739	133.731	155.463	334.253	250.36
Gm13889	ns	1.04199e-05	111.457	129.158	97.6956	102.305	245.846	217.317
Gm1673	ns	0.0142999	516.117	403.812	364.357	407.212	528.023	643.055
Gng11	1.64119e-10	2.17977e-12	97.3996	100.369	269.063	364.084	81.1412	91.502
Gng13	ns	0.00121499	1170.8	1191.98	1053.03	1104.29	1460.54	1509.78
Gng7	0.0252869	2.50922e-11	429.763	458.276	294.688	279.833	716.949	575.7
Gp9	0.00337154	ns	5.0206	3.89029	32.8321	52.1553	2.42213	2.54172
Gpr26	ns	0.00391116	449.845	407.702	357.95	366.09	213.147	240.193
Gpr88	0.000124399	0.00665639	270.108	245.088	131.329	119.355	216.78	217.317
Gpx4	ns	0.00657736	256.05	230.305	309.102	305.911	479.581	460.052
Grp	ns	0.0172735	70.2883	122.933	70.469	95.2837	169.549	169.024
Gtf2f1	ns	0.013686	266.092	290.215	226.622	229.684	381.485	327.882
H2-Aa	4.6582e-11	5.57077e-08	11.0453	8.55863	96.8948	157.469	7.26638	24.1464
H2-Ab1	1.76742e-14	2.09491e-10	17.07	17.8953	131.329	190.567	24.2213	25.4172
H2-D1	0.0104684	0.000175645	191.787	167.282	304.298	320.956	148.961	176.65
H2-K1	0.00070915	4.1985e-05	141.581	128.379	251.446	293.875	138.061	114.377
Hba-a1	3.92529e-75	4.32e-55	165.68	199.961	4192.1	5958.74	311.243	279.589
Hba-a2	3.39926e-70	4.88598e-51	120.494	143.941	3069.4	4484.35	221.625	216.046
Hbb-bs	2.56248e-51	1.32555e-39	777.188	1111.84	17277.7	24132.8	1329.75	1399.22
Hbb-bt	8.27285e-47	5.69312e-40	194.799	284.769	4395.5	6326.84	311.243	285.944
Herc3	ns	0.0221275	281.153	341.567	408.4	324.967	237.368	230.026
Hint1	ns	0.00467532	1136.66	1316.47	1306.88	1144.41	1610.71	1836.39
Hlf	ns	0.00879946	613.517	465.278	571.76	475.415	333.042	336.778
Hopx	ns	0.00717906	450.85	527.523	415.607	484.442	662.451	664.66
Hsp90b1	ns	9.84455e-05	506.076	508.85	534.123	449.338	760.548	815.893
Hspa8	ns	0.0151547	4486.4	4432.59	4169.68	4343.93	5131.27	5538.41
Hspe1	ns	0.00353703	350.438	388.251	397.989	362.078	546.189	613.826
Hsph1	ns	0.00558343	1486.1	1506.32	1281.25	1323.94	1796.01	1661.01
Htra1	ns	5.13103e-05	498.043	473.837	420.411	422.257	746.015	635.43
Ids	ns	0.00195139	1719.05	1780.2	1816.18	1822.43	1383.03	1324.24
Igfbp2	ns	0.00558343	179.737	224.859	106.504	141.421	196.192	275.777
Itga2b	0.000265849	ns	10.0412	8.55863	52.8517	68.2031	10.8996	15.2503
Itgb2	0.00140366	0.000275591	13.0535	21.7856	71.2697	80.2389	14.5328	17.792
Kalrn	ns	0.0265989	1192.89	1049.6	984.964	934.783	690.306	738.37
Kcnip2	ns	0.00920461	338.388	331.452	233.829	259.773	362.108	399.05
Kcnma1	ns	0.0287613	632.595	565.648	542.131	456.359	337.887	355.841
Klf2	0.0198295	0.000732287	47.1936	17.8953	113.711	90.2687	26.6434	26.6881
Klhl29	ns	0.00624022	140.577	153.277	169.766	151.451	82.3523	82.6059
Kmt2e	ns	0.00425899	232.956	231.861	283.477	256.764	158.649	157.587
Lars2	ns	0.00586099	362.487	347.014	221.016	350.042	449.304	514.699
Lat	0.00746083	ns	3.01236	1.55611	30.4298	35.1045	2.42213	5.08344
Lmtk2	ns	2.1183e-05	342.405	337.677	320.313	313.935	155.016	174.108
Lpcat4	ns	0.00250459	126.519	123.711	128.125	103.308	53.2868	45.751
Lrrc10b	0.000681627	0.000272252	74.3048	57.5762	17.6172	15.0448	62.9753	64.8139
Lsp1	0.000359015	8.81032e-07	23.0947	20.2295	93.6917	94.2807	6.05531	20.3338
Ly6a	6.33818e-05	0.00879946	335.376	229.527	118.516	131.391	222.836	227.484
Ly6h	ns	5.65741e-05	1866.66	2232.25	1772.94	2065.15	2870.22	2881.04
Lyn	ns	0.00311716	22.0906	38.9029	54.4533	78.2329	20.5881	11.4377
Lyz2	3.25221e-20	1.23146e-15	60.2472	52.1298	272.266	358.066	60.5531	72.4391
Maged1	ns	0.0261584	1253.14	1249.56	1404.57	1125.35	1683.38	1701.68
Manf	ns	0.00281981	126.519	140.828	163.36	178.532	297.921	296.111
Mapk3	ns	0.0260181	1059.35	1340.59	1208.38	1379.11	1837.18	1692.79
Mas1	ns	0.0422266	91.3748	70.8032	77.676	90.2687	138.061	171.566
Matr3	ns	3.363e-06	1668.85	1710.17	2029.19	1808.38	1260.72	1279.76
Mea1	ns	0.00012313	265.087	273.098	267.462	277.827	467.47	458.781
Megf9	ns	0.00164427	413.697	382.804	439.63	439.308	287.022	264.339
Metrn	ns	1.02698e-05	246.009	246.644	128.926	191.57	323.354	359.654
Mfge8	ns	1.81596e-07	734.011	723.593	629.416	717.135	1165.04	1095.48
Mfsd14b	ns	0.036707	114.47	128.379	157.754	148.442	77.508	92.7728
Mgp	0.00368657	ns	398.635	394.475	220.216	248.741	209.514	188.087
Mical2	ns	0.0297406	960.942	855.863	733.518	863.571	537.712	611.284
Mif	ns	4.70916e-05	986.045	1012.25	1007.39	1107.3	1508.98	1611.45
Mink1	ns	0.0134	388.594	415.483	330.724	310.926	564.355	420.655
Minos1	ns	0.0172299	791.246	701.03	799.182	654.95	945.84	1123.44
Mlc1	ns	0.0105863	458.882	495.623	423.615	497.481	697.572	636.701
Mmd2	ns	0.0336326	781.205	789.728	581.369	765.278	985.805	890.873
Mpp2	ns	0.00565524	264.083	302.664	239.434	279.833	428.716	395.238
Mpped1	ns	0.0135541	429.763	434.156	425.216	465.386	664.874	604.93
Mrpl52	ns	2.03593e-05	341.401	285.547	293.888	307.917	520.757	546.47
Mrps21	ns	0.0081298	89.3666	102.704	103.301	89.2658	184.082	181.733
Mt3	ns	1.37008e-19	5678.29	4448.15	4018.33	4221.57	8929.17	8657.1
Myadm	ns	0.010577	183.754	183.622	217.813	222.663	124.739	130.899
Myl6	ns	0.00135343	241.993	238.864	228.223	268.8	431.138	393.967
Myo5a	ns	0.00157178	1128.63	1079.17	1185.96	1128.36	778.713	861.644
Naa38	ns	3.65457e-05	375.541	392.141	426.017	374.114	610.376	804.455
Naca	ns	0.0282079	477.961	543.084	546.134	437.302	664.874	747.266
Ncald	ns	0.0493021	2569.54	2801.78	2908.45	2754.2	2229.57	2315.51
Ndufa11	ns	0.00146775	1279.25	1110.29	1072.25	1086.23	1453.28	1594.93
Ndufa13	ns	5.97125e-05	2005.23	1750.63	1708.07	1935.76	2581.99	2784.46
Ndufa3	ns	9.04811e-07	1905.82	1771.64	1620.79	1674.99	2377.32	2612.89
Ndufa4	ns	0.00177444	1978.11	1819.1	2104.46	1957.83	2655.86	2816.23
Ndufa5	ns	0.0175404	836.431	792.841	884.065	734.186	1064.52	1165.38
Ndufa6	ns	0.0097043	1249.12	1103.29	1133.91	999.977	1449.64	1451.32
Ndufa7	ns	0.000435522	1473.04	1367.05	1266.04	1284.83	1716.08	1852.91
Ndufaf8	ns	0.000279098	339.392	354.016	305.099	287.857	458.993	526.136
Ndufb10	ns	0.00926177	1036.25	1009.14	1004.18	979.917	1287.36	1354.74
Ndufb11	ns	0.000144005	498.043	569.538	548.537	455.356	748.437	926.457
Ndufb2	ns	0.000128813	1022.19	934.447	878.46	852.538	1197.74	1422.09
Ndufb5	ns	0.0356426	764.135	757.05	767.952	695.069	908.297	1063.71
Ndufb6	ns	0.0244016	833.419	908.771	747.131	742.21	942.207	1061.17
Ndufb7	ns	0.00152987	819.361	795.953	799.983	818.437	1115.39	1153.94
Ndufb8	ns	0.00999725	854.505	903.325	909.69	838.496	1131.13	1249.26
Ndufb9	ns	0.00181066	1790.34	1668.16	1732.1	1603.77	2146	2447.68
Ndufc1	ns	0.00219353	869.567	780.392	710.295	739.201	993.072	1072.61
Ndufs5	ns	0.00269804	44.1812	40.459	99.2972	64.1911	181.659	181.733
Ndufs6	ns	0.0111768	1124.61	1052.71	856.839	1010.01	1200.16	1382.7
Ndufs7	ns	0.00874743	692.842	616.221	735.92	654.95	995.494	953.146
Ndufs8	ns	2.12373e-06	452.858	438.824	482.072	453.35	746.015	860.373
Ndufv3	ns	0.000105303	984.037	1071.39	923.304	934.783	1287.36	1491.99
Necab2	ns	0.00136679	264.083	291.772	187.383	219.654	369.374	326.611
Nedd8	ns	0.00173409	669.747	715.813	675.861	685.039	1028.19	927.728
Nnat	ns	1.81596e-07	793.254	992.023	751.936	954.843	1529.57	1563.16
Nop53	ns	0.01685	324.33	269.208	289.884	275.821	420.239	434.634
Npnt	ns	0.0281825	87.3584	52.1298	56.8556	35.1045	9.6885	17.792
Nptn	ns	0.0294026	2041.37	1991.05	2338.29	2218.61	1728.19	1869.44
Nptx2	ns	0.0160837	174.717	190.624	164.961	160.478	314.876	232.568
Nrsn2	ns	0.0268399	218.898	262.205	276.27	225.672	388.751	383.8
Nsg2	ns	0.0165506	1325.44	1571.68	1469.44	1390.14	1976.45	1833.85
Opcml	ns	0.0165132	750.077	641.119	714.299	749.231	536.501	503.261
Otof	ns	0.0230514	32.1318	53.686	16.8165	22.0657	50.8646	64.8139
Palm	ns	0.00104384	884.629	921.22	844.026	938.795	1241.34	1286.11
Pcp4l1	0.00244974	0.00464858	283.162	256.759	157.754	135.403	244.635	260.526
Pdcd5	ns	0.00437137	228.939	229.527	227.423	187.558	329.409	359.654
Pde1b	ns	0.00315398	641.632	592.102	471.662	489.457	697.572	697.703
Pdia6	ns	4.1342e-05	263.079	315.113	253.848	291.869	508.646	472.76
Pdyn	0.021659	0.00219975	169.696	157.946	88.0862	83.2478	170.76	167.754
Pea15a	ns	0.00874743	2635.81	3080.33	2431.98	3015.98	3760.35	3686.77
Penk	2.6675e-16	5.44843e-15	701.879	512.74	219.415	155.463	594.632	562.991
Pf4	0.000265849	0.000268161	7.02883	24.1198	156.153	217.648	23.0102	13.9795
Pfdn5	ns	0.000424755	1500.15	1394.28	1518.29	1463.36	1997.04	2150.3
Pfkl	ns	0.00538785	375.541	446.605	381.974	379.129	587.366	556.637
Pgk1	0.00244974	ns	7.02883	3.89029	33.6329	37.1105	67.8195	44.4801
Phb	ns	0.00204755	101.416	133.826	96.094	116.346	242.213	189.358
Pik3r1	ns	4.6161e-05	403.656	333.009	383.575	443.32	216.78	227.484
Plek	ns	0.0358562	35.1442	32.6784	82.4807	79.2359	29.0655	38.1258
Plppr2	ns	0.0405267	481.977	512.74	537.326	527.571	779.925	674.827
Plppr4	ns	0.00665639	884.629	835.634	980.159	776.311	536.501	649.41
Pmm1	ns	0.0163994	1028.22	1003.69	952.132	1038.09	1266.77	1375.07
Pnck	ns	0.00576572	409.681	545.418	430.021	498.484	681.828	747.266
Pnmal2	ns	0.0337462	1422.84	1489.98	1325.3	1442.29	1953.44	1661.01
Polr2f	ns	0.0197116	302.24	324.45	290.684	283.845	383.907	488.01
Ppia	0.000248526	0.0273225	167.688	190.624	402.794	289.863	506.224	560.45
Ppp1ca	ns	0.0097043	814.341	713.479	731.916	781.326	1069.37	1017.96
Ppp1r1b	0.00171293	ns	495.031	456.72	313.106	188.561	392.384	383.8
Ppp2r5d	ns	0.0464258	127.523	143.163	96.8948	150.448	198.614	227.484
Prmt1	ns	1.09054e-06	178.733	217.856	85.6839	147.439	294.288	306.277
Prss23	ns	0.0273225	80.3295	58.3543	103.301	96.2867	42.3872	48.2927
Psmb5	ns	0.0456629	114.47	122.933	137.735	118.352	190.137	238.922
Psmc5	ns	8.21901e-05	559.294	539.194	480.47	525.565	759.336	820.976
Psme2	ns	0.00204755	108.445	139.272	101.7	105.314	192.559	217.317
Ptov1	ns	0.0420729	1011.15	925.11	960.94	1054.14	1248.61	1390.32
Ptpn18	1.21929e-05	7.20267e-06	56.2307	45.1273	154.551	164.49	41.1761	59.7305
Ptpn5	ns	0.0437518	515.113	519.742	396.388	415.236	612.798	515.969
Ptprc	1.20545e-06	6.30746e-08	15.0618	11.6709	76.0744	109.325	8.47744	8.89602
Rab5c	ns	0.00250459	351.442	343.123	260.255	282.842	416.606	438.447
Rac2	0.000447139	ns	16.0659	15.5611	61.6603	80.2389	30.2766	31.7715
Rack1	ns	0.0276922	1060.35	995.135	1005.78	1184.53	1381.82	1542.82
Rap1gds1	ns	0.0134263	924.794	1028.59	1117.09	1123.34	818.679	845.122
Rapgef4	ns	1.3277e-07	971.987	838.746	921.702	968.885	512.28	565.533
Rasl10a	ns	0.00114335	238.98	313.557	229.825	279.833	508.646	397.779
Rbm3	ns	0.00270449	66.2719	52.1298	73.6721	64.1911	19.377	22.8755
Rgs7bp	ns	0.0236863	862.538	797.509	887.268	685.039	569.2	536.303
Rgs9	ns	0.00538785	102.42	99.5914	48.047	50.1493	96.885	124.544
Romo1	ns	4.78302e-05	552.266	634.117	500.49	489.457	765.392	820.976
Rora	ns	0.0288515	159.655	95.7011	128.125	118.352	66.6085	50.8344
Rpl10	ns	7.49853e-08	269.104	247.422	366.759	305.911	634.597	681.181
Rpl10-ps3	ns	0.00230123	343.409	308.111	368.36	359.069	216.78	227.484
Rpl11	ns	1.58853e-07	1359.58	1321.14	1379.75	1224.65	1963.13	2291.36
Rpl12	ns	0.0414873	2077.52	1802.76	1857.02	1880.6	2258.63	2553.16
Rpl13a	ns	0.0384858	291.195	265.318	237.032	244.729	358.475	352.028
Rpl14	ns	0.013404	1594.54	1430.85	1499.87	1634.87	2043.06	2066.42
Rpl17	ns	0.000551666	1670.85	1535.89	1539.11	1686.02	2144.79	2385.41
Rpl18	ns	4.21568e-05	573.352	559.423	575.763	616.836	863.488	1072.61
Rpl18a	ns	2.76628e-09	1955.02	1663.49	1805.77	1681	2808.45	3081.84
Rpl19	ns	3.49729e-10	593.434	560.979	618.205	621.851	1074.21	1208.59
Rpl21	ns	1.51691e-11	1361.59	1247.23	1346.92	1294.86	2199.29	2577.31
Rpl22l1	ns	4.20751e-08	632.595	591.324	545.334	483.439	903.453	918.832
Rpl23	ns	1.33573e-08	1459.99	1429.29	1430.2	1295.86	2110.88	2314.24
Rpl24	ns	0.00122123	97.3996	105.038	84.8831	83.2478	167.127	184.275
Rpl26	ns	2.47086e-07	1956.02	1843.22	2013.17	1846.5	2814.51	3281.36
Rpl27	ns	6.15146e-07	466.915	449.717	445.236	400.191	724.216	756.162
Rpl27a	ns	4.31395e-06	470.932	431.044	504.494	464.383	771.447	870.54
Rpl28	ns	4.41902e-17	809.32	757.828	643.029	676.013	1328.54	1430.99
Rpl29	ns	0.000268161	551.261	569.538	471.662	500.49	753.281	730.745
Rpl3	ns	3.73061e-05	1556.38	1630.81	1507.88	1506.49	2051.54	2362.53
Rpl30	ns	3.80496e-05	1852.6	1626.14	1842.6	1638.88	2440.29	2832.75
Rpl31	ns	3.363e-06	2747.27	2507.68	2421.57	2430.24	3376.44	3840.54
Rpl32	ns	2.09491e-10	2117.69	1960.7	1833.79	1899.66	2935.62	3241.97
Rpl34	ns	3.40669e-09	1478.06	1360.04	1422.19	1402.17	2193.24	2602.72
Rpl35	ns	1.45603e-10	209.861	189.068	262.657	239.714	529.235	629.076
Rpl35a	ns	3.11779e-08	658.702	600.66	723.908	707.105	1163.83	1293.74
Rpl36	ns	2.5644e-20	924.794	754.716	881.663	910.711	1984.93	2128.69
Rpl36a	ns	4.4632e-11	821.369	758.606	847.229	761.266	1407.26	1757.6
Rpl37	ns	1.07483e-09	3788.54	3402.45	3189.52	3216.58	4933.87	6224.68
Rpl37a	ns	6.13655e-10	1508.19	1437.85	1453.42	1410.2	2273.17	2896.29
Rpl38	ns	1.77052e-09	3202.14	2799.45	2550.5	2564.64	3963.81	4844.52
Rpl41	ns	1.62775e-26	2497.24	2422.87	2234.19	2416.19	4799.44	5540.95
Rpl7a	ns	4.6291e-05	689.83	705.698	687.072	622.854	1018.5	992.542
Rpl8	ns	0.0012554	2269.31	2159.89	2068.42	2295.84	2856.9	3047.52
Rpl9	ns	0.00114851	2551.47	2414.31	2304.66	2322.92	2967.1	3225.44
Rplp0	ns	0.00230123	784.217	713.479	725.51	724.156	978.539	1091.67
Rplp1	ns	5.72946e-14	7254.76	6652.39	6599.26	6745.08	10808.7	12324.8
Rplp2	ns	6.38879e-14	1241.09	1217.66	1144.32	1329.96	2273.17	2338.38
Rprm	0.000128244	ns	95.3913	86.3644	197.794	211.63	145.328	170.295
Rps10	ns	0.000756563	1270.21	1112.62	1248.42	1193.55	1713.65	1720.75
Rps11	ns	6.29981e-19	746.061	676.132	718.303	659.965	1458.12	1612.72
Rps12	ns	1.56161e-06	2613.72	2456.33	2482.43	2549.59	3509.66	4295.51
Rps14	ns	2.88382e-05	4781.62	4001.55	4111.22	3776.24	5475.22	6397.51
Rps15	ns	1.3277e-07	2972.19	2502.23	2659.4	3109.26	4563.29	4779.71
Rps15a	ns	3.05322e-07	890.654	877.649	992.171	972.896	1498.08	1592.39
Rps16	ns	5.99164e-09	380.561	328.34	329.923	369.099	683.04	698.973
Rps17	ns	1.68914e-14	1292.3	1166.31	1093.07	1066.17	1949.81	2215.11
Rps18	ns	3.21451e-07	1622.66	1449.52	1338.11	1429.26	2070.92	2325.68
Rps19	ns	5.44653e-05	2526.36	2210.46	2200.55	2321.91	3060.36	3718.54
Rps2	ns	4.3255e-05	1770.26	1818.32	1475.04	1555.63	2099.98	2210.03
Rps21	ns	1.20968e-09	6212.49	5360.04	5299.59	5197.47	8100.8	10051.2
Rps23	ns	1.78995e-18	649.665	641.119	663.049	639.905	1340.65	1565.7
Rps24	ns	5.40188e-10	2223.12	2003.5	2043.6	2018.01	3181.46	3471.99
Rps26	ns	2.09327e-10	1784.32	1648.7	1719.28	1614.81	2664.34	2920.44
Rps27	ns	9.05187e-10	2829.61	2412.76	2443.99	2387.11	3825.75	4502.66
Rps27a	ns	3.35779e-06	1108.55	1126.63	1246.02	1130.37	1725.76	1952.04
Rps28	ns	1.15218e-08	1869.67	1689.16	1647.21	1726.14	2575.93	3006.86
Rps29	ns	8.26698e-20	4582.8	4101.92	3649.97	3819.37	7075.03	8583.39
Rps3	ns	0.00345662	2628.78	2363.74	2739.48	2616.79	3415.2	3676.6
Rps3a1	ns	7.20267e-06	794.258	805.289	888.87	789.35	1232.86	1478.01
Rps4x	ns	0.000255601	399.639	401.478	414.005	431.284	616.431	739.641
Rps5	ns	7.64253e-08	1905.82	1672.82	1845.01	1858.53	2806.03	3004.31
Rps7	ns	2.44439e-06	957.93	917.33	922.503	819.44	1300.68	1535.2
Rps8	ns	4.60685e-08	1858.62	1777.86	1803.36	1667.97	2602.57	2825.12
Rps9	ns	0.00380243	936.843	935.225	992.972	969.888	1315.21	1345.84
Rpsa	ns	2.78894e-09	1930.92	1663.49	1636.8	1689.03	2632.85	3000.5
Rragb	ns	0.00865297	166.684	167.282	211.407	243.726	136.85	120.732
Rrp7a	ns	0.0374991	156.643	166.504	164.961	133.397	242.213	241.464
Rsad2	0.017411	ns	5.0206	14.7831	56.0549	51.1523	4.84425	10.1669
Rsrp1	ns	1.19293e-06	1391.71	1078.39	1180.36	1313.91	743.593	686.265
Rtn4	ns	0.00905742	3352.75	3045.32	3396.12	2911.67	2378.53	2390.49
S100a1	ns	8.23947e-06	616.529	501.847	482.072	535.595	863.488	860.373
S100a13	ns	0.000143151	247.013	206.963	180.977	205.612	342.731	372.362
S100b	ns	0.0354981	425.747	367.243	334.728	338.006	466.259	495.636
Satb1	ns	1.75985e-05	301.236	231.861	346.739	338.006	157.438	177.92
Scai	ns	0.0140529	288.182	242.754	265.86	210.627	134.428	144.878
Scn1a	ns	0.032105	106.437	104.26	124.121	97.2896	58.131	52.1053
Scn2a	ns	0.0168982	797.271	694.805	775.159	654.95	505.013	500.719
Scn8a	ns	0.0215688	754.094	634.117	650.236	660.968	446.882	481.656
Selenow	ns	0.000421854	2015.27	1725.73	1865.03	1984.91	2680.08	2723.45
Serinc3	ns	0.0317135	1476.06	1479.09	1518.29	1500.47	1189.26	1178.09
Sf3b1	ns	0.0430041	658.702	628.67	760.744	667.989	525.601	528.678
Shank3	ns	1.65982e-05	321.318	347.014	273.868	353.051	167.127	128.357
Sla	0.0399319	ns	26.1071	27.232	76.0744	82.2449	25.4323	53.3761
Slc24a2	ns	0.000386234	948.893	700.252	976.956	718.138	358.475	369.82
Slc25a37	ns	0.00191316	94.3872	67.691	77.676	119.355	36.3319	30.5007
Slc2a1	ns	0.0126549	264.083	297.996	252.247	298.89	170.76	163.941
Slc36a1	ns	0.0241795	190.783	175.063	239.434	209.624	147.75	118.19
Slc4a10	ns	0.0260383	711.921	742.267	877.659	700.084	576.466	549.012
Slc6a17	ns	0.042217	1487.1	1430.07	1295.67	1493.45	1837.18	1747.43
Snap25	ns	0.000431392	8105.25	7368.98	8983.99	7462.22	5713.79	6031.5
Snhg11	ns	0.00461739	4732.41	3332.42	3645.97	4236.61	1999.46	2171.9
Snrpd2	ns	0.00558343	244.001	255.203	233.829	268.8	376.641	421.926
Snrpg	ns	0.0288074	190.783	186.734	141.739	138.412	196.192	274.506
Sod1	ns	2.6856e-06	1194.9	1307.14	1165.14	1130.37	1723.34	1757.6
Spock1	ns	0.00380243	611.509	555.533	734.319	728.168	505.013	505.803
Srgn	0.0399319	0.00717906	39.1606	54.464	91.2893	149.445	38.754	53.3761
Srsf5	ns	0.000878335	865.551	760.94	832.815	728.168	458.993	549.012
Ssh3	ns	0.0291431	83.3419	87.1424	72.8713	104.311	38.754	39.3967
Stip1	ns	0.00337573	554.274	539.194	502.892	597.78	795.668	812.08
Stmn3	ns	0.00806933	2716.14	3017.31	3084.62	2921.7	3750.66	4065.48
Stxbp1	ns	9.8007e-05	3001.31	2965.95	3278.41	3179.47	2402.75	2323.13
Syndig1l	0.0482547	ns	40.1648	62.2446	10.4102	16.0478	24.2213	19.0629
Synj1	ns	0.0215877	1891.76	1766.97	2085.24	1849.51	1483.55	1544.1
Syp	ns	0.0124576	1727.08	1889.9	2165.32	2107.27	2940.46	2628.14
Sytl2	ns	0.00548643	255.046	174.285	218.614	193.576	96.885	115.648
Tac1	9.21832e-09	7.33416e-12	281.153	209.297	92.8909	76.2269	266.434	296.111
Tagln	0.00160442	ns	83.3419	69.2471	18.418	23.0687	35.1208	39.3967
Tcp1	ns	0.0097043	368.512	399.922	369.161	326.973	484.425	561.72
Tesc	ns	0.0328985	235.968	277.766	208.204	220.657	408.128	279.589
Tfrc	ns	0.000602838	301.236	329.896	383.575	301.899	169.549	207.15
Timm13	ns	0.0324063	658.702	599.104	665.451	682.031	853.799	965.854
Timm8b	ns	0.000356792	896.678	890.876	830.413	809.41	1163.83	1185.71
Tkt	ns	0.0464258	549.253	574.984	518.908	569.696	720.582	740.912
Tmem256	ns	0.0167163	654.686	530.635	533.322	526.568	729.06	777.767
Tmem258	ns	0.00529256	255.046	235.751	224.219	241.72	363.319	378.716
Tnrc6a	ns	0.0114554	158.651	125.267	209.805	161.481	87.1965	106.752
Tpt1	ns	0.0428775	728.991	673.798	723.908	681.028	919.197	936.624
Trappc6b	ns	0.00275237	387.59	408.48	474.865	443.32	302.766	287.215
Trim32	ns	0.0345593	535.196	583.543	694.279	639.905	489.269	482.927
Trp53i11	ns	4.15157e-06	300.232	385.138	247.442	319.953	584.943	531.22
Tspoap1	ns	0.0126549	461.895	423.263	423.615	508.514	294.288	321.528
Tspyl4	ns	0.0120218	1303.35	1325.03	1511.08	1284.83	1070.58	993.813
Tuba1b	ns	0.00625017	1218	1395.84	1157.13	1217.63	1605.87	1603.83
Tubb5	ns	0.00385378	2013.26	2559.03	2178.93	2427.23	3303.78	3144.11
Txnl4a	ns	0.0240591	301.236	253.647	252.247	248.741	382.696	373.633
Ubc	ns	0.00219975	1787.33	1977.82	1713.68	1620.83	2192.02	2314.24
Ubqln2	ns	0.0378412	1022.19	918.886	1161.94	1013.02	747.226	865.456
Ubr3	ns	0.0126549	445.829	462.944	574.162	410.221	296.71	331.695
Uqcc2	ns	0.00017825	1259.17	1107.18	1055.43	1083.22	1552.58	1541.55
Uqcr10	ns	4.17883e-06	1823.48	1590.35	1571.94	1543.6	2273.17	2429.89
Uqcr11	ns	0.00665745	2918.97	2615.83	2447.19	2586.7	3135.44	3524.1
Uqcrb	ns	0.0393	701.879	640.341	730.315	560.669	873.176	927.728
Uqcrh	ns	0.0197116	1911.84	1921.8	1933.89	1658.94	2215.03	2532.83
Uqcrq	ns	0.000168161	1703.99	1449.52	1509.48	1610.8	2188.39	2333.3
Vps13d	ns	0.00417882	143.589	193.736	201.797	213.636	101.729	114.377
Vwa5b2	ns	0.0410882	129.531	100.369	115.313	154.46	71.4527	68.6265
Ywhaq	ns	0.0420589	901.699	1061.27	923.304	828.466	1167.46	1161.57
Zbtb18	ns	0.00212375	449.845	435.712	498.888	441.314	306.399	293.569
Zfand5	ns	0.00895938	521.138	581.209	721.506	603.798	474.737	423.197
Zfp445	ns	0.0062807	576.364	511.962	550.939	466.389	295.499	362.195
Zyx	0.0102942	0.00202178	171.704	192.18	305.099	336	158.649	202.067

## Sheet: STR
Supplementary Table S2: Normalized reads of baseline shifted genes (Dorsal Striatum)
SYMBOL	p.adj_Acute_Repeated	p_adj_Acute_Challenge	counts_Repeated_0h	counts_Repeated_0h.1	counts_Acute_0h	counts_Acute_0h.1	counts_Challenge_0h	counts_Challenge_0h.1
Aatk	ns	0.00312964	223.006	173.629	213.65	218.975	87.0623	124.647
Abi1	0.0317958	ns	306.382	328.688	471.167	478.327	342.445	442.427
Acot7	ns	0.0043084	294.328	419.68	298.135	277.212	452.724	515.023
Actb	0.00103824	9.84848e-06	5746.93	5327.71	4243.76	4415.21	5645.12	6026.87
Actl6b	0.00858098	ns	313.414	361.185	206.339	198.785	242.614	284.907
Adcy5	ns	0.0430417	2178.83	2270.17	2370.46	2500.35	2043.06	1943.67
Adgrb3	0.0373569	ns	237.069	235.838	363.124	350.204	275.117	294.495
Adora2a	0.0183739	0.00312964	318.437	400.182	207.964	233.728	426.025	338.326
Aes	ns	0.0236053	1019.6	1100.27	787.987	879.781	1081.89	1119.08
Agap2	9.52136e-06	1.04306e-05	853.852	936.853	552.403	580.826	914.735	875.266
Alcam	ns	0.0171505	800.612	828.219	745.744	672.454	956.525	949.232
Aldoa	ns	0.00337523	3055.79	3479.08	2666.16	2726.31	3476.69	3444.9
Anks1b	0.0132684	ns	1034.67	1051.99	1415.13	1317.73	1086.54	1105.38
Ap2a1	0.0317958	ns	427.931	534.814	326.568	319.92	472.458	409.553
Ap2b1	1.60752e-06	4.40162e-06	447.017	389.04	129.165	218.975	434.151	378.049
Ap2s1	ns	0.00141889	395.786	422.466	339.566	304.39	494.514	534.2
Arfgef3	0.0189654	ns	269.215	254.408	407.804	386.7	359.858	345.175
Arl4d	ns	0.0390367	124.562	125.347	101.545	85.4156	160.195	178.067
Arl6ip5	ns	0.00970452	98.4441	86.3502	52.8033	53.5789	118.405	120.537
Arpc4	0.00470883	ns	289.305	281.334	160.847	140.548	260.026	172.588
Atp1a3	0.0020242	0.000508173	1650.45	1762.29	1216.91	1327.05	1770.27	1716.29
Atp2b1	0.038079	ns	2523.38	2604.43	3068.28	3250.45	2500.43	2792.91
Atp2b2	ns	2.99886e-05	1523.87	1624.87	1739.26	1837.21	1229.32	1282.08
Atp5f1	0.0189654	ns	636.873	664.803	885.47	881.334	749.897	682.132
Atp5j	0.00858098	0.0444821	794.585	827.29	1139.74	1080.9	906.609	798.56
Atp5j2	ns	9.35635e-07	900.06	862.573	819.669	800.577	1243.25	1277.97
Atp6v0b	2.88157e-06	1.98799e-10	977.409	962.851	644.2	598.686	1096.99	1099.9
Atp6v1f	ns	0.0409914	485.189	519.958	439.486	424.749	670.96	542.418
Atxn1l	ns	0.0330197	111.503	78.9222	112.105	117.252	54.559	50.6805
Bsg	ns	2.0275e-05	852.847	918.283	701.877	630.523	977.42	1136.89
C1qtnf4	0.00103824	0.000197323	595.687	582.167	354.188	404.559	625.688	594.468
Cadm2	0.0165342	ns	847.825	818.934	1100.74	1127.49	885.714	1001.28
Calm2	0.000127256	ns	3077.89	3662.92	4805.91	4633.41	3838.87	4351.67
Caln1	ns	0.00823725	967.364	1122.55	1145.42	1184.17	865.98	846.501
Calr	0.000681733	4.27227e-06	1011.56	1102.13	762.804	713.609	1175.92	1114.97
Camk2a	0.0315027	ns	668.014	629.52	390.744	504.729	586.22	525.981
Camk2b	0.0245342	ns	2590.69	2891.34	2045.52	2286.81	2306.57	2346.37
Camta1	ns	0.0113372	331.495	350.043	400.492	409.218	266.991	258.881
Cap1	ns	0.0152035	421.903	405.753	348.501	346.321	496.836	516.393
Cct5	ns	0.0105572	243.097	312.903	272.952	270.224	442.277	419.141
Cfl1	0.00290291	0.0400362	2375.72	2571.01	1940.72	1886.91	2346.04	2335.41
Chchd2	ns	0.0444821	1618.3	1486.52	1470.37	1421.01	1817.86	1772.45
Chordc1	ns	0.0089678	168.761	191.27	197.403	180.149	315.746	317.78
Cic	0.01451	ns	321.45	301.761	173.032	202.668	200.824	217.789
Cldn11	ns	1.32579e-07	957.319	858.859	916.34	1039.74	495.675	594.468
Clip3	0.00414537	ns	702.168	759.51	502.849	504.729	573.45	621.863
Cnot7	0.0132684	ns	229.033	253.479	379.371	375.829	307.62	327.369
Cox6b1	ns	0.000173451	1353.1	1284.11	1135.68	982.28	1493.99	1554.66
Cox6c	ns	0.0390367	1327.99	1327.75	1405.38	1289	1721.51	1653.28
Cox7a2l	ns	0.0175621	275.242	274.835	219.337	203.444	352.893	313.671
Cpeb4	ns	0.0370005	136.616	140.203	207.151	236.834	143.943	109.579
Crym	0.0123283	2.86525e-06	1009.55	911.783	731.122	683.325	1144.58	1088.95
Cst3	ns	0.0036195	10668.1	9213.47	8535.44	7998.78	10085.3	11097.7
Ctxn1	3.30331e-08	1.46172e-07	1663.5	1772.5	1084.5	1132.92	1730.8	1651.91
Cyfip2	ns	0.00331921	581.624	643.448	796.111	820.766	593.185	508.175
Dad1	ns	0.00399061	462.085	428.037	357.437	311.379	517.731	510.914
Dbi	ns	1.0509e-06	1140.14	903.427	813.17	681.772	1405.77	1219.07
Dctn3	ns	0.00727653	459.071	488.389	413.49	391.359	574.611	605.426
Ddit3	ns	0.0381614	113.512	128.132	99.1076	104.052	153.23	223.268
Ddx39b	7.39775e-07	0.00908867	651.941	689.873	348.501	378.158	594.345	484.889
Dgkb	0.00753136	ns	965.355	1064.06	1320.89	1379.85	1319.86	1343.72
Dlg4	0.00601798	ns	369.668	408.538	220.149	256.247	299.494	286.276
Dpf1	ns	0.000104828	152.689	129.061	105.607	102.499	233.327	231.487
Drap1	0.00513591	0.00195548	548.474	558.955	363.936	382.817	552.555	580.771
Dtx3	0.0263002	ns	339.532	362.114	212.025	233.728	258.865	321.89
Dusp14	ns	0.0203399	133.603	222.839	207.964	171.608	312.263	368.461
Dusp3	ns	0.028567	306.382	304.547	257.517	217.422	351.732	373.94
Dynll1	ns	0.000532199	794.585	823.576	701.877	672.454	1092.34	935.534
Dynll2	ns	0.000749829	1524.88	1545.02	1212.85	1275.8	1632.13	1740.94
Eif3k	ns	0.00970452	359.622	267.407	272.14	230.622	394.682	432.839
Elob	ns	0.00194107	500.257	469.819	428.925	379.711	638.457	598.578
Elp5	ns	0.0195607	192.87	213.554	130.79	128.123	229.845	213.68
Ergic3	0.000253568	0.00208261	382.727	313.832	191.716	179.373	302.977	349.284
Fa2h	ns	0.00194107	91.4124	110.491	151.911	170.055	73.1323	63.0082
Fbxl16	ns	1.85278e-09	2312.43	2249.75	2606.04	2887.05	1697.13	1821.76
Fbxo32	ns	0.0362028	106.48	93.7781	123.478	132.782	53.3982	72.5964
Fcho1	0.0317958	ns	230.038	209.84	125.103	123.464	168.32	123.277
Fech	ns	0.00817709	174.789	170.843	212.025	228.293	83.5798	139.714
Fis1	ns	0.0043084	810.657	670.374	500.412	534.236	944.916	675.283
Fkbp4	ns	0.0225676	204.924	231.196	186.842	188.691	305.299	295.864
Fkbp8	0.000127256	0.00142799	1116.03	1097.48	753.056	771.847	1030.82	1094.42
Flot2	ns	0.00162957	191.866	232.124	149.474	133.559	285.564	252.033
Frrs1l	0.00973851	0.000254118	431.949	420.609	588.959	676.336	365.662	406.814
Fth1	ns	5.25766e-10	5797.15	5641.54	6656.46	6790.54	4672.34	4781.77
Fus	1.60752e-06	1.34317e-07	745.363	803.149	454.108	466.68	761.505	858.829
Gap43	ns	0.00295752	728.286	820.791	770.115	675.56	1041.27	1020.46
Gigyf1	0.00694596	ns	312.409	216.34	131.602	146.76	186.894	187.655
Glrb	0.0335901	ns	241.088	329.616	456.545	426.302	305.299	291.755
Gm1673	ns	0.00246592	146.662	158.773	112.918	122.688	225.201	230.117
Gm996	ns	0.028567	143.648	167.129	179.531	217.422	123.048	91.7728
Gpi1	0.0373569	ns	602.719	592.381	441.923	423.196	601.31	550.637
Gpm6a	0.00950168	ns	2106.5	1933.13	2694.59	2586.54	2328.63	1982.02
Gpm6b	3.45356e-05	0.029397	2237.09	2168.04	3250.24	2866.86	2464.44	2466.91
Gpr155	ns	0.00984054	294.328	258.122	327.38	333.121	217.075	182.176
Gpr88	2.27334e-06	0.000886309	2350.6	2519.01	3359.1	3408.86	2655.98	2573.75
Grb14	ns	0.0467992	144.653	116.062	127.54	127.347	54.559	75.3359
Gria2	0.000344064	ns	1889.52	1922.92	2508.56	2527.53	2225.31	2318.97
Gstm1	0.0127228	ns	961.337	746.511	601.957	573.838	665.156	627.342
Gtpbp2	0.0362093	ns	134.607	164.344	77.174	76.0975	91.7056	86.2938
Hat1	ns	0.0323215	44.1994	88.2071	56.0527	51.2494	123.048	126.016
Hbb-bt	ns	0.0373327	52.2357	63.1377	65.801	58.2379	109.118	154.781
Hmgn1	ns	0.0353525	293.323	280.406	271.327	241.493	409.773	360.242
Hnrnpl	ns	0.0023409	385.74	360.257	312.758	281.872	438.794	525.981
Homer1	0.0099025	ns	743.353	954.494	1321.71	1142.24	1185.21	1004.02
Hpca	0.0165342	ns	5978.97	5569.12	4657.25	4780.17	5337.5	5752.92
Hspa8	ns	6.96459e-11	1443.51	1402.96	1350.14	1188.83	2399.44	2042.29
Hspe1	ns	0.0353525	188.852	256.265	256.705	224.41	430.668	341.066
Hsph1	ns	1.0509e-06	785.544	839.361	713.25	655.371	1314.06	1032.79
Ica1	ns	0.0203399	133.603	130.918	110.481	104.828	178.768	213.68
Ifitm3	ns	0.000897147	92.4169	105.849	42.2426	31.8367	106.796	104.1
Impact	0.00385024	ns	410.853	464.248	688.879	625.863	579.255	530.09
Kcnab1	0.0165342	0.0444821	745.363	781.794	995.951	1071.58	748.736	834.173
Kcnn3	ns	0.0335042	106.48	132.775	86.1099	79.2036	157.873	153.411
Kif5b	0.00753121	0.0171505	412.863	346.329	595.458	555.978	386.557	397.225
Klf9	ns	0.00799076	520.347	605.38	623.891	736.904	448.081	468.452
Klhl2	ns	0.028567	513.316	540.385	632.014	709.726	484.066	482.149
Lpcat4	3.51841e-19	2.05419e-20	231.042	268.335	43.055	48.1433	229.845	298.604
Lpl	ns	0.0353525	318.437	287.834	307.071	430.184	233.327	228.747
Lrpprc	ns	0.0329127	190.861	177.343	108.044	110.264	213.593	168.478
Lrrc10b	ns	3.89116e-06	1059.78	1082.63	1182.79	1188.83	734.806	806.779
Ly6a	7.62264e-07	ns	214.97	191.27	73.1122	67.556	114.922	123.277
Ly6c1	2.97373e-05	ns	327.477	255.336	139.726	106.381	134.656	160.26
Ly6e	ns	0.00311413	209.947	225.625	140.538	141.324	250.739	258.881
Lzts3	1.56534e-05	0.011551	725.272	734.441	424.051	463.574	662.834	595.838
Mag	ns	0.0357907	530.393	548.741	500.412	553.648	251.9	423.251
Mal	ns	0.00188888	869.924	692.658	757.93	827.755	486.388	546.527
Map1b	ns	0.0390367	1019.6	1038.99	1118.62	1118.17	871.784	878.005
Map3k10	0.000900492	ns	180.816	214.483	75.5493	96.2867	148.586	112.319
March6	ns	0.0413679	284.282	315.689	437.048	428.631	282.082	310.932
Matr3	ns	1.02563e-05	1336.03	1258.11	1212.85	1139.13	1807.41	1647.8
Maz	0.00292337	ns	265.196	232.124	132.414	135.888	201.985	204.092
Mbp	0.00230948	1.65817e-28	6912.18	6534.76	8242.99	8671.24	4342.67	4710.55
Mbtps1	ns	0.00541307	134.607	156.916	190.092	213.539	94.0273	109.579
Mctp1	ns	0.0089678	332.5	419.68	517.472	482.986	282.082	349.284
Med31	0.0165342	ns	153.693	133.703	73.1122	68.3325	131.174	113.689
Midn	ns	0.00012916	60.2719	72.4227	46.3044	56.6849	131.174	175.327
Mobp	ns	3.06837e-05	2487.22	2016.69	1970.78	2131.51	1315.22	1417.68
Mt3	1.15806e-09	2.69585e-08	3096.97	2638.79	1839.18	1639.98	2862.61	2675.11
Myt1l	0.0220606	0.0238049	586.647	612.808	819.669	835.52	557.199	651.998
Nbea	0.0432594	0.0318828	292.319	333.33	466.293	459.691	278.599	342.436
Ncdn	2.78669e-07	1.26372e-08	2785.57	2937.76	2017.9	1969.99	2866.09	3033.98
Ndufa13	ns	0.01652	764.449	782.722	774.177	699.632	957.685	1030.05
Ndufa3	ns	0.000638307	1041.7	1011.13	884.658	771.07	1163.15	1210.85
Ndufb7	ns	0.0045905	336.518	294.333	254.268	269.447	467.815	384.898
Ndufs6	ns	0.00337523	582.628	483.747	452.483	472.115	681.408	702.678
Nefm	ns	0.0036195	240.083	259.05	365.561	362.628	213.593	223.268
Nme1	ns	0.0203399	460.076	430.822	431.362	430.961	588.541	630.082
Nme7	0.00290291	0.0123897	437.976	362.114	255.08	222.081	392.361	361.612
Nnat	0.001623	7.75913e-07	601.715	471.676	345.252	267.118	746.414	561.595
Npy	0.00109229	0.0198229	410.853	384.397	226.648	236.058	394.682	320.52
Nr4a1	0.0012501	ns	63.2855	95.6351	225.835	169.278	208.95	364.352
Nus1	ns	0.00218984	235.06	309.189	366.373	395.241	208.95	223.268
Osbpl8	0.0259737	ns	487.198	571.954	762.804	709.726	718.554	686.241
Ost4	1.21694e-06	3.37899e-05	208.943	209.84	83.6728	69.8855	167.16	210.94
Pabpc1	0.0421594	ns	202.915	213.554	326.568	318.367	264.669	224.638
Pam	ns	0.0381614	179.811	172.7	178.719	144.43	262.348	264.36
Pcsk1n	0.0315027	0.0176254	2150.7	2105.83	1638.53	1717.63	1986.18	2309.39
Pde10a	ns	0.0193973	4827.78	4804.04	5091.86	4988.27	3952.63	4348.93
Pde1b	0.0395411	0.0395469	2964.37	3125.32	2433.82	2574.12	2989.14	3075.07
Pdia4	ns	0.00817709	56.2538	57.5668	56.0527	45.8138	128.852	115.058
Pdia6	ns	0.025464	139.63	161.558	160.034	158.407	325.033	227.377
Pdp1	0.0123283	ns	315.423	385.326	606.019	477.551	669.799	610.905
Pdpk1	ns	0.00193017	258.165	306.404	389.119	389.806	225.201	231.487
Pdzd11	ns	0.0185633	125.566	111.42	98.2953	89.2981	176.446	176.697
Phactr1	ns	0.041532	2375.72	2405.73	2312.78	2352.04	1946.71	1894.35
Phlda1	ns	0.025464	86.3897	83.5647	86.1099	83.0861	147.426	180.806
Pja2	0.0196426	ns	957.319	963.779	1213.66	1286.67	1081.89	1064.29
Plcb1	0.0244885	ns	470.121	619.307	750.619	821.543	596.667	573.922
Plp1	ns	0.00132313	6976.47	7038	7573.61	7999.56	5171.5	6459.71
Polr2f	ns	0.00945391	165.748	139.274	114.542	90.0746	229.845	172.588
Ppp1cb	0.0069029	ns	856.866	978.635	1226.66	1267.26	1081.89	1056.07
Ppp1r11	ns	4.27227e-06	355.604	368.613	284.325	264.788	482.906	535.569
Ppp1r2	ns	0.0339747	424.917	408.538	520.721	526.471	358.697	382.158
Ppp3ca	0.00173451	0.00141889	7081.95	7697.23	9059.41	9449.3	7291.18	7487.01
Ppp3r1	0.00322287	0.00815517	705.181	811.506	1114.55	1052.94	733.645	825.955
Prkag2	ns	0.0400362	155.702	139.274	112.918	100.169	185.733	184.915
Prkar2b	ns	0.0390367	384.736	376.041	329.817	326.132	438.794	502.696
Prkcb	ns	0.00172897	1971.9	1675.94	2192.55	2233.23	1641.41	1636.84
Prkcg	1.54466e-08	0.000247113	368.663	365.828	162.472	152.195	312.263	273.949
Psap	0.0368954	ns	442.998	468.891	615.767	646.829	501.479	469.822
Psd	0.000325864	0.00970452	1215.48	1276.68	892.781	878.228	1167.8	1164.28
Psmb7	ns	0.000247113	347.568	355.614	243.707	247.705	430.668	413.662
Ptpn11	ns	0.0187423	150.68	158.773	187.655	215.869	114.922	106.84
Ptprd	ns	0.0371872	380.718	363.971	445.984	414.654	300.655	291.755
Ptprj	ns	0.0444821	84.3807	117.919	57.6774	72.215	130.013	130.126
R3hdm4	ns	0.0275331	850.838	704.729	598.708	531.906	727.841	869.787
Rab18	ns	0.00807098	190.861	249.765	279.451	307.496	123.048	190.394
Rap1gap	ns	0.00423209	1064.8	1044.56	811.545	951.996	644.261	593.099
Rapgef4	0.0363624	1.23822e-12	796.594	744.654	1021.13	1011.79	524.696	519.133
Rarres2	ns	0.00346921	91.4124	82.6362	50.3662	19.4126	117.244	98.6215
Rasl10b	0.0259737	ns	1442.51	1569.16	1190.1	1153.89	1272.27	1197.16
Rbfox1	0.0245342	0.00141889	1037.68	1000.92	1324.96	1345.68	891.518	1023.2
Rgs2	ns	0.000669809	453.044	543.17	610.081	585.485	872.945	947.862
Rhoa	ns	0.00331921	264.192	259.05	177.094	179.373	308.781	299.974
Rnf44	ns	0.0155625	410.853	429.894	574.337	573.061	348.249	431.469
Rpl10-ps3	ns	0.00243609	138.625	117.919	79.6111	68.3325	154.39	171.218
Rpl31	ns	0.00742811	1532.92	1430.81	1448.43	1384.51	1817.86	1842.3
Rpl38	ns	0.000147165	627.832	662.018	530.47	503.176	770.792	821.846
Rplp2	0.0306679	ns	567.56	576.596	794.486	753.21	608.275	619.124
Rps19	ns	0.0171505	568.565	456.82	466.293	452.703	611.758	745.14
Rps20	ns	0.0356374	792.576	827.29	720.561	703.514	904.287	962.929
Rps26	3.57956e-05	1.35821e-06	1081.88	916.426	653.136	632.076	1081.89	1024.57
Rps28	ns	0.0337614	504.275	506.03	549.154	492.305	669.799	771.165
Rps29	ns	0.00615023	1637.39	1675.94	1732.76	1542.92	2103.43	2149.13
Rps3	ns	0.0248741	1397.3	1270.18	1341.2	1235.42	1598.46	1712.18
Rtn4	0.019703	ns	2168.78	2324.03	2835.94	2767.47	2299.61	2476.5
Sars	0.0436589	0.0187423	370.672	273.906	202.277	206.55	344.767	320.52
Scd2	0.0123283	7.44311e-05	1738.84	1664.79	2114.57	2200.62	1557.83	1584.79
Scg2	ns	0.00059479	624.819	742.797	731.122	643.723	1189.85	958.82
Scn8a	ns	0.0353525	545.461	573.811	515.847	538.118	367.983	386.267
Sdccag3	0.0132684	0.00160352	131.594	158.773	69.0504	75.321	170.642	152.041
Sdhb	ns	0.00713387	476.148	502.316	420.801	427.855	644.261	591.729
Sdhc	0.0135659	0.00863198	241.088	242.338	394.806	367.287	241.453	234.226
Sec62	0.0388963	ns	367.659	402.967	527.22	546.66	601.31	634.191
Selenow	5.19369e-05	0.00195569	2229.06	1994.41	1340.39	1520.4	1834.11	2125.84
Sept7	0.038079	ns	597.696	562.669	789.612	762.528	690.694	679.392
Sertad4	ns	0.0205277	108.489	129.989	192.529	206.55	123.048	83.5543
Sfswap	ns	0.0334092	110.498	120.705	131.602	102.499	55.7199	56.1595
Shank3	2.08233e-11	2.37189e-05	491.216	474.462	193.341	205.774	343.606	406.814
Sirpa	ns	0.00823725	367.659	380.683	434.611	480.657	291.369	305.453
Sirt2	ns	0.0100259	255.151	275.763	329.817	385.147	196.18	238.335
Skp1a	ns	0.000337655	893.029	779.008	688.879	722.927	1061	1024.57
Slc1a2	ns	3.32482e-07	4404.87	3936.82	4654.81	4580.61	3130.76	3328.48
Slc6a1	ns	0.0174692	561.533	521.815	704.314	607.227	495.675	395.856
Slc6a6	ns	0.0089678	394.781	460.534	402.117	472.892	279.76	278.058
Snn	ns	0.0073262	385.74	378.826	454.108	524.918	320.389	316.411
Sparc	0.0069029	ns	397.795	447.535	271.327	235.281	242.614	319.15
Sparcl1	ns	0.000616697	1642.41	1371.39	1819.68	1807.7	1180.56	1354.68
Spock3	6.48665e-08	2.38275e-05	983.437	1195.9	1772.56	1788.29	1182.89	1188.94
Srm	ns	0.00312964	333.505	388.111	293.261	290.413	508.444	431.469
Sst	4.11423e-12	2.9821e-15	1050.74	1207.05	583.273	616.545	1221.19	1201.26
Stip1	ns	3.31981e-05	229.033	267.407	229.085	215.092	459.689	393.116
Stmn3	ns	0.0154109	942.251	1111.41	972.392	867.357	1208.42	1284.82
Tagln3	ns	0.00463312	387.749	435.465	510.161	428.631	686.051	723.224
Tecr	0.00875013	ns	1064.8	1009.28	780.676	757.093	983.224	964.299
Tesc	ns	0.0275482	407.84	386.254	366.373	388.253	540.947	531.46
Tm2d3	ns	0.025464	143.648	111.42	112.918	131.229	231.005	206.831
Tmed7	0.0293337	ns	178.807	225.625	338.753	313.708	219.397	242.444
Tmeff1	ns	0.0335042	151.684	194.056	263.204	287.307	165.999	165.739
Tmem259	ns	0.00252174	142.644	146.702	82.0481	89.2981	195.02	162.999
Tpi1	0.0196418	0.021946	861.888	898.784	674.257	629.746	840.442	908.14
Tpt1	0.000152449	0.00021278	463.089	474.462	797.735	703.514	493.353	446.536
Trim23	0.037897	ns	129.585	133.703	220.149	223.634	165.999	194.503
Trp53inp2	ns	0.0381614	281.269	311.046	324.131	357.969	236.809	208.201
Tsc22d1	ns	0.0334092	1186.35	1176.4	934.211	948.113	1269.95	1147.84
Tspan2	ns	5.18423e-05	387.749	290.619	421.614	417.76	199.663	228.747
Tspan7	ns	0.0089678	2468.13	2380.66	2891.99	3052.44	2483.02	2169.67
Ttc9b	0.00290291	0.0390367	392.772	291.548	186.842	198.009	299.494	308.192
Tuba1a	ns	0.0203399	1369.18	1388.1	1342.83	1236.2	1819.02	1543.7
Tubb5	ns	0.0476583	666.005	768.795	662.884	621.981	884.553	825.955
Uba52	0.0212071	0.00675724	132.598	142.988	63.3639	76.0975	146.265	146.562
Ubl5	ns	0.0268607	472.13	501.388	406.991	399.9	553.716	579.401
Uchl1	ns	0.0207889	1488.72	1608.16	1284.34	1379.85	1867.78	1598.49
Ulk2	ns	0.0493553	155.702	160.63	200.652	183.255	111.44	113.689
Uqcc2	ns	0.00310635	505.279	423.394	490.664	420.866	677.925	717.745
Uqcr11	ns	0.0113372	1089.92	914.569	852.976	744.669	1127.17	1082.1
Vamp2	0.000106805	1.0509e-06	1801.13	2040.83	1393.19	1314.62	1964.13	2128.58
Vapb	ns	0.0358941	236.065	243.266	179.531	197.232	261.187	345.175
Vps35	0.0331502	ns	267.205	282.263	435.424	396.018	370.305	301.343
Wasl	ns	0.042253	150.68	239.552	229.897	238.387	121.887	142.453
Ywhae	ns	0.0070661	1725.79	1960.06	1532.11	1641.53	2146.38	2012.15
Zfp385a	ns	0.01652	143.648	167.129	96.6706	86.1921	157.873	190.394
