# Supplementary material for: Egr2 induction in spiny projection neurons of the ventrolateral striatum contributes to cocaine place preference in mice
Source: eLife. 2021 Mar 16;10:e65228. doi: 10.7554/eLife.65228 (PMC8057818; doi:10.7554/eLife.65228)
Supplement: Supplementary file 3. [file elife-65228-supp3.xlsx]

## Sheet: merge_GO
Supplementary Table S3: Clusters of Gene Ontology (GO) analysis and corresponding genes
Cluster ID	Reference	GO terms included in the cluster	AMG	LH	NAC	LCtx	STR
Cluster 1	Figures 1C, S4 - Synaptic genes	anterograde trans-synaptic signaling	Agt/Apoe/App/Cnr1/Cplx2/Egr1/Gpr88/Grik5/Lypd1/Napb/Nrxn2/Penk/Ppp1r9b/Rph3a/Shank1/Slc17a7/Snap25/Sv2b/Syn2/Synj1/Vgf/Ywhag/Lynx1/Prkcg	Nrgn/Ptk2b/Sncb/Egr1/Ppp3ca/Rac3	Adgrb1/Adora2a/Apoe/Arf1/Brsk1/Calb1/Camk2a/Camk4/Cnih2/Cplx2/Dvl1/Fgf12/Gabra1/Gabrg1/Gnai1/Grik5/Grin1/Grin2b/Kcnc3/Mchr1/Mef2c/Mgll/Ncdn/Nlgn2/Nrgn/Pcdh17/Ppp1r9b/Prkcg/Prnp/Rab11a/Rasd2/Rin1/Sdcbp/Sez6/Shisa7/Slc24a2/Slc5a7/Snap25/Snap47/Snap91/Sptbn2/Sqstm1/Syt7/Tpgs1/Xbp1/Ywhag	Apoe/Atp2b2/Cartpt/Cd24a/Chrm3/Dbi/Gfap/Gpr88/Kalrn/Kcnma1/Mink1/Mpp2/Myo5a/Nptn/Otof/Pdyn/Penk/Psmc5/Ptpn5/Rapgef4/S100b/Shank3/Slc24a2/Snap25/Stxbp1/Synj1/Syp/Tac1	Adora2a/Atp2b2/Cfl1/Dbi/Gpr88/Ica1/Kif5b/Ncdn/Pdzd11/Ppp3ca/Prkcg/Rapgef4/Shank3/Slc6a1/Vamp2/Camk2a/Camk2b/Dlg4/Glrb/Gria2
		chemical synaptic transmission	Agt/Apoe/App/Cnr1/Cplx2/Egr1/Gpr88/Grik5/Lypd1/Napb/Nrxn2/Penk/Ppp1r9b/Rph3a/Shank1/Slc17a7/Snap25/Sv2b/Syn2/Synj1/Vgf/Ywhag/Lynx1/Prkcg
		signal release from synapse	Cplx2/Grik5/Napb/Nrxn2/Rph3a/Snap25/Syn2/Synj1		Adora2a/Brsk1/Camk2a/Cplx2/Dvl1/Grik5/Kcnc3/Mef2c/Snap25/Snap47/Snap91/Sptbn2/Syt7/Xbp1	Otof/Snap25/Stxbp1/Synj1	Adora2a/Ica1/Pdzd11/Vamp2/Camk2a
		vesicle-mediated transport in synapse	Amph/Cplx2/Grik5/Napb/Rph3a/Sh3gl2/Snap25/Synj1		Arf1/Canx/Cnih2/Cplx2/Dpysl2/Grik5/Mff/Nlgn2/Snap25/Snap47/Snap91/Sptbn2/Syt7/Trim46	Cd24a/Otof/Snap25/Stxbp1/Synj1/Syp
		neuron projection organization			Actr2/Actr3/Apoe/Arf1/Dvl1/Grin1/Grin2b/Prnp/Srcin1/Vps35		Atp1a3/Cfl1/Lzts3/Shank3/Wasl/Camk2b/Dlg4/Sept7/Vps35
		exocytic process	Grik5/Napb/Snap25/Synj1		Grik5/Snap25/Snap47/Stxbp2	Lyn/Otof/Plek/Snap25/Stxbp1/Synj1/Sytl2
		regulation of blood vessel diameter			Adora2a/Apoe/Manf/Map2k1/Mgll/Rgs2	Apoe/Chrm3/Kcnma1/Manf/Rap1gds1/Sod1
		glutamate receptor binding					Adora2a/Atp2b2/Flot2/Fus/Shank3/Calm2/Camk2a/Dlg4/Homer1
		ligand-gated cation channel activity			Grik5/Grin1/Grin2b/Ryr1/Ryr3/Itpr1
		neurotransmitter receptor transport			Cacng2/Rab11a/Snap25/Snap47/Vps35
		protein transport within plasma membrane			Cacng2/Rab11a/Snap25/Snap47/Vps35
		regulation of postsynaptic membrane neurotransmitter receptor levels			Cacng2/Camk2a/Rab11a/Snap25/Snap47
		vesicle-mediated transport to the plasma membrane			Rab11a/Rab34/Snap25/Snap47/Vps35
		neurotransmitter receptor transport to plasma membrane			Rab11a/Snap25/Snap47/Vps35
		regulation of synaptic vesicle cycle			Grik5/Mff/Nlgn2/Pcdh17
Cluster 2		translation				Dapk3/Gapdh/Lars2/Mapk3/Mrpl52/Mrps21/Ndufa7/Ppp1ca/Rack1/Rbm3/Rpl10/Rpl11/Rpl12/Rpl13a/Rpl14/Rpl17/Rpl18/Rpl18a/Rpl19/Rpl21/Rpl22l1/Rpl23/Rpl24/Rpl26/Rpl27a/Rpl28/Rpl29/Rpl3/Rpl30/Rpl31/Rpl32/Rpl34/Rpl35/Rpl35a/Rpl36/Rpl37/Rpl37a/Rpl38/Rpl7a/Rpl8/Rpl9/Rplp1/Rplp2/Rps11/Rps14/Rps15/Rps16/Rps17/Rps18/Rps19/Rps2/Rps21/Rps23/Rps24/Rps26/Rps27/Rps27a/Rps28/Rps29/Rps3/Rps3a1/Rps4x/Rps5/Rps7/Rps8/Rps9/…
		structural constituent of ribosome				Fau/Mrpl52/Mrps21/Ndufa7/Rpl10/Rpl11/Rpl12/Rpl13a/Rpl14/Rpl17/Rpl18/Rpl18a/Rpl19/Rpl21/Rpl22l1/Rpl23/Rpl24/Rpl26/Rpl27/Rpl27a/Rpl28/Rpl29/Rpl3/Rpl30/Rpl31/Rpl32/Rpl34/Rpl35/Rpl35a/Rpl36/Rpl37/Rpl37a/Rpl38/Rpl8/Rpl9/Rplp0/Rplp1/Rplp2/Rps10/Rps11/Rps12/Rps14/Rps15/Rps15a/Rps16/Rps17/Rps18/Rps19/Rps2/Rps21/Rps23/Rps24/Rps26/Rps27/Rps27a/Rps28/Rps29/Rps3/Rps3a1/Rps4x/Rps5/Rps7/Rps8/Rps9/Rpsa
		antimicrobial humoral immune response mediated by antimicrobial peptide				Fau/Gapdh/Pf4/Romo1/Rpl30/Rps19
		mitochondrial gene expression				Lars2/Mrpl52/Mrps21/Ndufa7/Uqcc2
		macrophage migration				Mapk3/Mif/Rpl13a/Ccl5
Cluster 3		cell surface receptor signaling pathway involved in cell-cell signaling	Apoe/App/Cdk14/Dkk3/Egr1/Grik5/Plpp3/Shank1/Slc17a7	Ptk2b/Egr1/Ndrg2/Ppp3ca	Adora2a/Aes/Apc2/Apoe/Celsr3/Dvl1/Gabra1/Grik5/Grin1/Grin2b/Gskip/Macf1/Mef2c/Nlgn2/Sez6/Snx3/Sox4/Spin1/Tsc2/Ube2b/Ubr5/Vps35	Apc/Apoe/Dapk3/Mpp2/Pfdn5/Shank3	Adora2a/Aes/Ddit3/Ppp3ca/Shank3/Dlg4/Vps35
		cell-cell signaling by wnt	Apoe/Cdk14/Dkk3/Egr1/Plpp3		Aes/Apc2/Apoe/Celsr3/Dvl1/Gskip/Macf1/Snx3/Sox4/Spin1/Tsc2/Ube2b/Ubr5/Vps35	Apc/Apoe/Dapk3/Pfdn5
Cluster 4		inorganic cation transmembrane transporter activity			Asic4/Atp5d/Atp6v0a1/Atp6v0b/Atp6v1a/Atp6v1e1/Atp6v1h/Cacng2/Cacng7/Cox6a1/Gpm6a/Grik5/Grin1/Grin2b/Hcn2/Kcnc3/Kcnt1/Mcu/Pkd1/Ryr1/Ryr3/Scn4b/Scn8a/Slc12a9/Slc24a2/Slc39a10/Slc4a3/Slc5a7/Slc6a6/Slc6a8/Snap25/Stim1/Tmco1/Tusc3/Itpr1
		ATP hydrolysis coupled cation transmembrane transport			Atp6v0a1/Atp6v0b/Atp6v1a/Atp6v1e1/Atp6v1h
		ATP hydrolysis coupled ion transmembrane transport			Atp6v0a1/Atp6v0b/Atp6v1a/Atp6v1e1/Atp6v1h
		ion channel regulator activity			Nedd4/Stim1/Sumo1/Itpr1
Cluster 5		plasma membrane bounded cell projection assembly			Actn2/Actr2/Actr3/Atp6v1d/Celsr3/Crocc/Dynll1/Dynll2/Fbf1/Gpm6a/Hsp90aa1/Palm/Ppp1r9b/Rap1gap/Rhog/Tctn1/Tpgs1/Ube2b	Apc/Arl3/Dctn1/Dynll1/Palm/Ssh3/Ccl5/Rac2	Cfl1/Dynll1/Dynll2/Gap43/Rap1gap/Wasl/Gpm6a/Sept7
		regulation of plasma membrane bounded cell projection assembly			Actr3/Crocc/Dynll1/Gpm6a/Hsp90aa1/Palm/Rap1gap/Rhog	Apc/Dynll1/Palm/Ssh3/Rac2	Cfl1/Dynll1/Gap43/Rap1gap/Wasl/Gpm6a/Sept7
		positive regulation of plasma membrane bounded cell projection assembly			Actr3/Crocc/Dynll1/Gpm6a/Hsp90aa1/Palm	Apc/Dynll1/Palm/Rac2	Cfl1/Dynll1/Wasl/Gpm6a/Sept7
		sperm motility			Celf3/Dnaja1/Tpgs1/Ube2b
Cluster 6	Figures 1C, S4 - Projection morphogenesis	plasma membrane bounded cell projection morphogenesis					Aatk/Actb/Adora2a/Alcam/Cfl1/Cyfip2/Gap43/Kif5b/Lzts3/Mag/Map1b/Nefm/Ppp3ca/Ptpn11/Ptprd/Shank3/Uchl1/Ulk2/Wasl/Abi1/Adgrb3/Camk2a/Camk2b/Dlg4/Gpm6a/Impact/Rtn4/Sept7
Cluster 7		process utilizing autophagic mechanism	Atpif1/Cltc/Hspa8/Mapk3/Pacs2/Srebf1		Atg12/Atp6v0a1/Cltc/Eif4g2/Fis1/Hspa8/Map2k1/Pik3c2b/Pip4k2c/Sec22b/Sqstm1/Srebf1/Tmem59/Tsc2/Wdr45b/Xbp1	Gabarapl1/Gfap/Hspa8/Mapk3/Mt3/Rpl28/Rragb/Ubqln2	Fis1/Hspa8/Mt3/Sirt2/Trp53inp2/Ulk2
		autophagosome organization			Atg12/Pik3c2b/Pip4k2c/Sec22b/Wdr45b
Cluster 8		regulation of protein localization to membrane			Actr3/Camk2a/Cltc/Fis1/Hpca/Nlgn2/Ogt/Pgrmc1/Ppp1r9b/Prnp/Ptn/Rab11a/Rhog/Sqstm1/Tmem59	Camk2g/Kalrn/Myo5a/Necab2/Pdcd5/Pik3r1/Rack1/Shank3	Fis1/Kif5b/Pdpk1/Shank3/Camk2a/Camk2b/Clip3/Hpca
		positive regulation of protein localization to membrane			Actr3/Fis1/Hpca/Nlgn2/Pgrmc1/Ppp1r9b/Prnp/Ptn/Rab11a/Rhog/Sqstm1	Myo5a/Necab2/Pdcd5/Rack1	Fis1/Kif5b/Pdpk1/Clip3/Hpca
Cluster 9		purine ribonucleotide metabolic process					Acot7/Adcy5/Adora2a/Aldoa/Atp2b2/Atp5j/Atp5j2/Cap1/Cox7a2l/Hspa8/Ndufs6/Nme1/Nme7/Pde10a/Pde1b/Prkag2/Rhoa/Sdhc/Tpi1/Uqcc2/Atp5f1/Gpi1/Hpca
Cluster 10	Figures 1C, S4 - Protein folding	protein folding			B2m/Canx/Cct2/Cct3/Cct4/Cct7/Chordc1/Dnaja1/Dnajb11/Fkbp4/Hsp90aa1/Hsp90ab1/Hsp90b1/Hspa8/Hspe1/Hsph1/Pdia6/Pfdn4/Ppia/Ptges3/St13/Tcp1
		unfolded protein binding			Canx/Cct2/Cct3/Cct4/Cct7/Dnaja1/Dnajb11/Hsp90aa1/Hsp90ab1/Hsp90b1/Hspa5/Hspa8/Hspe1/Ptges3/St13/Tcp1
		protein localization to Cajal body			Cct2/Cct3/Cct4/Cct7/Tcp1
		protein localization to nuclear body			Cct2/Cct3/Cct4/Cct7/Tcp1
		RNA localization to nucleus			Cct2/Cct3/Cct4/Cct7/Tcp1
Cluster 11		microtubule-based transport	App/Dynll1/Kif3c/Nefl/Nme7		Bsn/Cnih2/Dynll1/Dynll2/Kif1a/Map2k1/Sun2/Trim46	Arl3/Dctn1/Dynll1/Myo5a/Sod1	Dynll1/Dynll2/Kif5b/Map1b/Nefm/Nme7/Uchl1
		axonal transport			Bsn/Cnih2/Kif1a/Trim46
Cluster 12	Figuers 1C, S4 - Actin filament	regulation of actin filament organization			Actn2/Actr2/Actr3/Arf1/Arpc3/Arpc5/Hip1r	Arhgef10l/Myadm/Pik3r1/Plek/Shank3/Ssh3/Tac1	Cfl1/Rhoa/Shank3/Wasl/Arpc4
Cluster 13		hydrogen ion transmembrane transporter activity				Atp5b/Atp5e/Atp5h/Atp5j/Atp5k/Atp5o/Cox5b/Cox7a2/Cox7c/Cox8a/Ndufa4/Slc36a1/Uqcr10/Uqcr11/Uqcrb/Uqcrh/Uqcrq
Cluster 14		cellular response to environmental stimulus			Agap3/Impact/Palm/Ppp1r9b/Slc38a3/Tspyl5	Actb/Cdkn1a/Cops9/Palm/Pik3r1/Rpl26/Scn2a
Cluster 15		meiotic nuclear division			Actr2/Actr3/Lemd2/Marf1/Ppp2r1a/Spin1/Ube2b		Calr/Sirt2/Camk2b/Plcb1
Cluster 16		mitotic nuclear division	Cltc/Pebp1/Ywhah/Zwint		Akap8/Chmp2b/Chmp5/Cltc/Fbxw5/Mzt1/Ppp2r1a/Rab11a/Ywhah/Zwint
Cluster 17		regulation of lipid localization			Acsl4/Apoe/Prelid1/Vstm2a		Lpl/Nus1/Ptpn11/Osbpl8
Cluster 18		positive regulation of chromatin organization			Akap8/Ogt/Srebf1/Ube2n/Wbp2/Xbp1
Cluster 19		transcriptional activator activity, RNA polymerase II transcription regulatory region sequence-specific binding					Camta1/Ddit3/Klf9/Myt1l/Tsc22d1/Nr4a1
Cluster 20	Figuers 1C, S4 - myelination	structural constituent of myelin sheath	Mal/Mbp/Mobp/Pllp/Plp1
Cluster 21		transcriptional activator activity, RNA polymerase II core promoter proximal region sequence-specific binding	Dbp/Egr1/Etv1/Neurod6/Srebf1
Cluster 22		catalytic activity, acting on RNA					Ddx39b/Polr2f/Sars/Cnot7
Cluster 23		modification-dependent protein binding			Agap3/Otud7b/Spin1/Sqstm1
