# Supplementary material for: Egr2 induction in spiny projection neurons of the ventrolateral striatum contributes to cocaine place preference in mice
Source: eLife. 2021 Mar 16;10:e65228. doi: 10.7554/eLife.65228 (PMC8057818; doi:10.7554/eLife.65228)
Supplement: Supplementary file 4. [file elife-65228-supp4.xlsx]

## Sheet: AMG
Supplementary Table S4: Normalized reads of induced genes (Amygdala)
SYMBOL	Experiment	Type	p_adjusted	AMG_Acute_0h	AMG_Acute_0h.1	AMG_Acute_1h	AMG_Acute_1h.1	AMG_Acute_2h	AMG_Acute_2h.1	AMG_Acute_4h	AMG_Acute_4h.1	AMG_Challenge_0h	AMG_Challenge_0h.1	AMG_Challenge_0h.2	AMG_Challenge_1h	AMG_Challenge_1h.1	AMG_Challenge_1h.2	AMG_Challenge_1h.3	AMG_Challenge_2h	AMG_Challenge_2h.1	AMG_Challenge_2h.2	AMG_Challenge_2h.3	AMG_Challenge_4h	AMG_Challenge_4h.1	AMG_Challenge_4h.2	AMG_Challenge_4h.3	AMG_Repeated_0h	AMG_Repeated_0h.1	AMG_Repeated_1h	AMG_Repeated_1h.1	AMG_Repeated_2h	AMG_Repeated_2h.1	AMG_Repeated_4h	AMG_Repeated_4h.1
Alkal2	Acute, Challenge	induced	0.00781024	22.18	21.98	19.72	26.1	35.73	34.99	15.51	10.36	32.82	43.2	35.53	46.14	83.29	49.66	52.35	58.56	52.24	67.5	70.91	49.58	37.26	49.18	32.2	27.88	22.6	43.04	47.24	39.98	41.91	20.87	34.88
Arc	Acute, Repeated, Challenge	induced	1.53387e-05	199.66	182.81	438.47	511.64	300.72	131.45	149.69	187.56	229.72	182.18	262.5	449.49	458.07	498.7	372.08	514.93	405.46	394.78	262.79	375.67	130.83	228.12	209.92	172.44	160.28	528.45	416.04	476.79	277.48	163.63	233.29
Arid5a	Challenge	induced	0.000872573	23.15	24.97	34.7	41.12	28.59	21.75	14.83	26.47	21.04	17.28	13.76	47.63	40.6	51.73	35.37	52.5	27.36	41.93	51.45	23.33	27.73	38.25	20.28	28.91	35.96	40.03	48.14	43.88	56.63	45.03	37.06
Arl4d	Acute, Repeated, Challenge	induced	6.35418e-07	25.08	40.96	60.72	73.54	40.68	21.75	25.62	18.41	24.4	26.64	21.78	75.91	57.26	73.46	39.61	55.19	27.36	40.91	26.42	41.42	28.59	19.12	22.66	27.88	13.36	45.04	61.77	38.03	49.83	28.55	23.98
Btg2	Acute, Challenge	induced	1.37335e-07	28.94	25.97	69.4	80.66	31.89	40.66	42.48	37.97	29.45	39.6	44.7	85.58	67.67	58.97	77.81	63.94	54.72	49.09	33.37	38.5	29.46	38.25	34.59	43.37	35.96	48.04	59.05	45.83	39.64	43.93	52.33
Cyr61	Acute, Challenge	induced	2.64903e-06	9.65	2	26.02	35.59	4.95	9.46	5.39	6.9	13.46	11.52	1.15	29.77	20.82	26.9	21.22	15.48	7.46	16.36	12.51	9.33	11.26	12.29	5.96	13.42	19.52	13.01	23.62	10.73	4.53	17.57	18.53
Ddit4	Acute, Repeated, Challenge	induced	2.17343e-06	194.84	158.83	313.87	271.24	166.03	187.24	161.82	246.25	180.91	225.38	186.84	295.44	249.86	281.42	239.09	269.92	187.8	238.3	162.68	192.5	166.36	181.68	159.83	211.68	209.59	311.27	342.46	245.71	253.7	276.75	329.22
Dio2	Repeated, Challenge	induced	9.03833e-07	109.96	104.89	147.47	173.18	153.38	112.53	107.88	141.53	133.79	138.25	140.99	213.58	158.24	223.48	168.36	290.11	212.68	243.41	200.22	264.83	253	217.19	193.22	98.1	101.71	165.14	102.65	207.68	190.27	143.86	155.89
Dusp1	Acute, Repeated, Challenge	induced	8.49468e-08	66.55	67.93	87.54	80.66	48.93	53.9	51.92	64.44	74.05	72.73	72.21	109.4	106.19	115.88	127.33	108.37	101.99	93.07	93.16	77.58	63.25	57.37	70.37	46.47	54.45	103.09	75.4	69.23	75.88	40.63	47.97
Egr2	Acute, Repeated	induced	0.00893684	17.36	7.99	48.89	36.38	18.69	6.62	4.72	11.51	10.94	10.8	13.76	55.07	36.44	37.25	19.81	24.23	19.9	28.64	11.12	28.58	3.47	20.49	16.7	3.1	5.14	31.03	11.81	19.5	13.59	7.69	9.81
Egr4	Acute, Challenge	induced	0.00487979	130.21	89.91	223.97	217.47	146.23	88.89	93.05	131.18	159.88	90.01	174.23	279.07	231.12	195.55	178.26	213.37	187.8	189.21	211.35	143.5	120.44	143.43	161.02	100.16	95.55	162.14	131.72	158.93	107.6	109.82	111.19
Fos	Acute, Repeated, Challenge	induced	7.16519e-06	40.51	22.98	90.69	101.22	62.67	34.04	30.34	32.22	84.99	35.28	76.8	169.67	133.26	148.99	97.62	140.01	93.28	129.89	93.16	87.5	48.52	50.54	50.1	15.49	21.58	84.07	55.41	56.55	21.52	25.26	29.43
Fosb	Challenge	induced	0.0320211	37.62	36.96	55.2	56.94	47.28	41.61	37.76	43.73	80.78	40.32	79.09	146.6	131.18	128.3	90.54	141.35	99.5	135	100.11	95.08	83.18	81.96	58.44	27.88	64.73	76.07	60.86	62.4	60.03	61.5	47.97
Gadd45b	Acute, Repeated, Challenge	induced	1.30711e-10	68.48	50.95	109.62	120.99	89.61	71.87	82.94	80.55	86.67	64.81	99.73	129.49	175.94	170.72	148.55	120.49	120.64	164.66	154.34	103.25	61.52	79.23	78.72	77.44	70.89	143.12	125.36	113.1	99.67	94.44	81.76
Gm13889	Acute, Repeated	induced	0.00594721	259.46	264.72	376.96	307.62	295.22	292.21	243.41	204.82	240.66	164.18	247.59	280.56	296.71	346.61	280.12	258.47	278.6	246.48	285.04	229.83	212.28	275.93	307.73	267.44	251.71	335.29	326.11	363.69	321.65	265.76	270.36
Ier5l	Acute, Repeated, Challenge	induced	3.66706e-05	83.91	65.93	141.95	110.71	87.96	104.97	68.1	84	76.57	59.05	72.21	107.91	100.98	95.19	91.96	100.97	97.01	106.37	100.11	75.83	65.85	66.93	81.11	96.03	88.36	120.1	123.54	129.68	143.84	98.84	113.38
Junb	Acute, Repeated, Challenge	induced	1.53671e-30	425.36	344.64	820.95	852.47	479.38	445.4	356.01	455.67	439.24	389.56	371.39	825.3	866.18	863.93	690.4	670.41	646.74	705.69	678.53	679.59	445.35	461.71	490.22	317.01	360.62	748.64	712.18	680.58	479.08	363.5	494.93
Kcng1	Acute, Repeated, Challenge	induced	0.00406921	199.66	222.77	174.28	200.07	259.48	258.16	211.72	239.34	266.74	222.5	296.88	340.84	315.45	317.64	391.89	383.67	334.57	378.41	378.2	309.75	260.8	349.7	353.05	288.09	314.39	391.34	408.77	335.41	325.05	273.45	352.12
Klf10	Repeated, Challenge	induced	0.000104846	65.59	77.92	114.35	76.71	101.15	85.11	57.99	59.84	100.13	93.61	122.65	147.35	197.8	145.88	125.91	95.58	114.42	154.43	154.34	122.5	77.98	80.59	72.76	47.5	62.67	111.1	95.38	79.95	95.14	53.81	50.15
Ly6a	Acute, Repeated	induced	0.000274042	131.18	105.89	101.73	114.66	190.21	212.77	200.93	192.17	129.58	194.42	162.77	125.77	111.4	152.09	219.29	156.83	145.52	156.48	194.66	179.08	183.69	148.89	177.72	269.51	246.58	175.15	150.79	249.61	226.52	240.51	210.4
Nab2	Acute, Repeated, Challenge	induced	2.15266e-06	170.72	175.82	223.97	238.03	225.4	178.73	140.25	146.14	162.4	126.01	149.01	180.84	187.39	171.75	179.67	217.41	210.19	198.41	179.37	185.5	178.49	166.65	147.9	192.06	179.8	222.19	262.52	212.56	211.79	129.59	163.52
Neurod2	Repeated	induced	0.0320211	84.88	107.89	97.79	123.36	126.44	139.01	140.25	119.67	135.47	113.77	139.84	162.98	181.15	133.47	152.79	152.12	210.19	185.12	169.63	172.67	181.95	161.19	149.09	109.45	122.26	191.16	178.95	131.63	152.9	143.86	160.25
Npas4	Acute, Challenge	induced	0.000967437	47.26	36.96	52.05	64.84	34.08	29.32	36.41	18.41	34.5	23.04	30.95	69.95	95.78	79.67	74.98	57.21	14.92	35.8	27.81	42.58	25.99	38.25	19.08	47.5	45.21	74.06	84.48	53.63	13.59	26.36	18.53
Nr4a1	Acute, Repeated	induced	0.00166755	149.5	139.85	268.92	262.54	148.43	124.83	118.67	166.85	237.29	135.37	198.3	244.84	234.24	299.01	223.53	238.95	194.02	249.55	168.24	245.58	160.29	188.51	145.52	106.36	103.77	235.2	187.13	198.91	154.03	101.03	143.9
Per1	Acute, Repeated, Challenge	induced	2.28055e-06	247.89	288.7	379.33	370.09	272.13	247.76	229.25	262.36	235.61	213.14	178.82	288.74	252.98	252.45	237.68	264.53	228.85	249.55	253.06	211.17	213.14	206.27	203.96	261.25	251.71	327.28	329.74	334.44	269.56	235.01	235.47
Pnpla7	Acute, Repeated	induced	0.0229873	54.01	48.95	33.12	45.87	55.53	55.79	91.7	79.4	43.76	66.25	53.87	45.4	48.93	35.18	55.18	55.19	69.65	27.61	33.37	53.08	57.19	73.76	63.22	78.48	72.95	48.04	33.61	74.1	56.63	93.35	68.68
Pwwp2b	Repeated, Challenge	induced	0.00893684	75.23	99.9	60.72	67.22	84.11	66.2	66.75	66.74	81.62	66.97	51.58	88.56	99.94	113.81	97.62	95.58	90.79	94.09	104.28	58.33	90.11	64.2	75.14	59.89	66.78	101.09	99.92	128.71	100.8	81.27	89.39
Rara	Repeated, Challenge	induced	2.13881e-09	47.26	36.96	32.33	41.12	57.17	52.96	33.71	27.62	36.18	30.96	44.7	57.3	66.63	64.15	63.66	49.81	70.89	66.48	69.52	26.25	35.52	60.1	50.1	23.75	12.33	60.05	68.13	78	89.47	46.12	39.25
Rps6ka4	Repeated	down-regulated	0.0393268	131.18	132.86	126.97	158.16	111.6	132.39	94.4	107.01	104.34	77.05	126.09	119.81	125.97	113.81	124.5	111.74	135.57	116.59	130.7	100.33	106.57	107.91	151.48	144.56	170.55	190.16	168.05	152.11	130.25	86.76	99.2
Sertad1	Acute, Repeated	induced	0.0277017	68.48	49.95	82.81	69.59	61.57	49.17	41.8	35.67	55.54	36.72	66.48	63.26	72.88	66.22	80.64	61.25	82.09	86.93	80.64	67.67	62.38	49.18	57.25	39.24	44.18	85.07	68.13	76.05	54.36	39.54	55.6
Snhg11	Acute	induced	0.00893684	4539.11	4202.59	4011.71	4150.04	4893.9	5324.03	4953.87	6230.99	3331.34	3735.01	3113.26	3178.41	4027.93	4072.36	4631.9	3902.66	4710.03	4356.88	4602.32	4131.19	4399.79	4388.95	5672.7	5646.21	5518.19	5291.53	5134.2	5732.26	5682.19	5174.71	5679.66
Sstr2	Acute, Repeated	induced	0.000299301	138.89	128.86	160.09	136.02	208.91	179.67	140.25	123.12	291.14	205.94	240.72	286.51	267.56	273.15	217.87	356.07	360.68	326.25	265.57	324.34	270.33	233.59	225.43	131.14	148.97	272.23	213.47	264.24	212.93	142.77	187.51
Stk40	Acute, Repeated, Challenge	induced	0.000941779	87.77	94.9	111.98	131.27	121.5	125.77	93.05	84	100.13	120.25	92.85	151.07	139.5	134.5	151.38	181.74	154.22	152.39	150.17	129.5	113.5	121.57	140.74	140.43	108.9	129.11	160.78	158.93	156.3	102.13	114.47
Tiparp	Repeated, Challenge	induced	0.000827845	45.33	24.97	51.26	84.61	39.58	25.53	31.69	58.69	32.82	25.92	32.1	76.65	61.42	47.59	42.44	55.87	26.12	43.98	31.98	39.08	29.46	30.05	33.4	24.78	19.52	62.05	57.23	23.4	29.45	24.16	38.16
Tle3	Challenge	induced	0.0464249	58.84	66.93	96.21	80.66	52.78	65.25	68.78	60.99	63.95	55.45	55.02	110.14	73.92	95.19	106.11	107.02	87.06	78.75	82.04	73.5	81.45	77.86	76.34	74.35	92.47	107.09	79.94	104.33	110.99	79.07	86.12
Tsc22d3	Repeated, Challenge	induced	0.00127655	229.56	295.69	212.14	250.68	249.04	245.87	242.06	315.29	248.23	258.51	197.16	258.23	256.11	279.35	271.63	380.98	343.27	285.34	294.77	231.58	317.98	270.47	243.32	289.13	198.29	174.15	222.55	313.96	266.16	353.62	384.82
Usp40	Repeated, Challenge	induced	0.0281323	48.23	48.95	43.37	51.4	57.72	62.41	72.82	67.89	38.71	46.8	38.97	37.95	43.73	55.87	53.76	39.71	34.82	47.05	52.84	56	67.58	76.5	66.79	56.79	72.95	55.05	46.33	58.5	50.97	85.66	83.94

## Sheet: NAC
Supplementary Table S4: Normalized reads of induced genes (Nucleus Accumbens)
SYMBOL	Experiment	Type	p_adjusted	NAC_Acute_0h	NAC_Acute_0h.1	NAC_Acute_0h.2	NAC_Acute_0h.3	NAC_Acute_1h	NAC_Acute_1h.1	NAC_Acute_1h.2	NAC_Acute_1h.3	NAC_Acute_2h	NAC_Acute_2h.1	NAC_Acute_2h.2	NAC_Acute_4h	NAC_Acute_4h.1	NAC_Acute_4h.2	NAC_Challenge_0h	NAC_Challenge_0h.1	NAC_Challenge_1h	NAC_Challenge_1h.1	NAC_Challenge_1h.2	NAC_Challenge_1h.3	NAC_Challenge_2h	NAC_Challenge_2h.1	NAC_Challenge_2h.2	NAC_Challenge_2h.3	NAC_Challenge_4h	NAC_Challenge_4h.1	NAC_Challenge_4h.2	NAC_Challenge_4h.3	NAC_Repeated_0h	NAC_Repeated_0h.1	NAC_Repeated_1h	NAC_Repeated_1h.1	NAC_Repeated_2h	NAC_Repeated_2h.1	NAC_Repeated_4h	NAC_Repeated_4h.1
Arc	Acute, Repeated	induced	2.61007e-06	298.14	317.73	186.42	217.89	438.22	364.48	469.68	682.11	122.3	176.31	205.87	136.69	189.12	218.45	178.94	279.23	458.19	426.92	445.9	538.73	458.7	312.01	277.77	216.41	343	162.37	452.68	144.2	206.14	224.85	455.35	556.32	367.97	244.87	165.06	201.32
Arid5a	Challenge	induced	0.0467419	12.66	8.85	10.52	19.28	30.25	21.97	25.67	19.66	9.88	20.48	14.24	16.08	13.13	25.86	13.85	13.48	33.12	41.58	25.92	28.08	34.35	25.15	43.25	30.06	28.31	20.42	28.79	9.61	9.01	16.73	25.07	26.45	29.66	23.63	14.59	17.55
Arl4d	Acute, Repeated	induced	1.17479e-07	67.92	74.76	70.74	57.85	91.68	139.8	110.29	108.12	59.3	59.66	66.8	43.78	54.28	59.74	51.95	74.14	103.05	116.62	100.24	64.93	84.2	90.34	98.14	44.08	78.4	55.42	60.78	41.66	60.04	44.97	88.26	93.02	63.33	53.7	72.04	92.35
Btg2	Challenge	induced	0.0122908	51.8	71.81	37.28	29.89	47.67	33.95	57.05	71.75	33.36	30.28	29.57	32.16	38.52	41.02	45.02	49.11	66.24	80.11	93.33	96.51	52.07	40.98	48.24	24.05	68.6	23.33	43.19	35.25	38.03	38.69	45.13	82.99	74.56	38.66	31.01	28.63
Ccdc6	Repeated, Challenge	induced	0.029662	222.17	208.54	203.63	187.04	189.77	253.64	193.01	216.23	200.13	208.37	226.67	207.27	214.51	197.05	250.51	246.49	204.25	239.32	171.1	178.99	245.97	246.81	219.56	208.4	174.22	178.9	183.95	141	199.14	196.61	233.69	210.67	266.96	285.68	227.07	223.49
Cdkn1a	Challenge	induced	0.0140423	112.81	121.98	108.98	161.97	138.43	160.77	149.27	136.62	105.01	153.16	162.07	115.25	115.57	147.12	95.82	101.1	144.45	187.6	198.75	122.84	199.43	217.94	216.23	158.3	121.95	157.51	187.15	160.22	106.07	89.94	196.58	118.56	162.74	121.36	177.82	129.29
Ddit4	Acute, Repeated	induced	2.41768e-06	246.34	274.45	221.79	246.81	323.62	362.49	314.71	329.26	248.31	267.14	254.05	206.37	212.75	239.85	196.25	248.42	328.46	270.75	307.64	270.24	261.48	259.85	282.76	194.37	238.46	145.84	225.54	221.11	285.2	258.31	370.1	358.42	315.06	316.82	312.79	351.86
Dusp1	Acute, Repeated, Challenge	induced	3.08408e-11	64.46	73.78	62.14	64.6	96.26	102.85	115.04	131.7	81.54	81.03	79.94	65.22	75.3	70.44	60.61	77.99	114.09	130.81	93.33	149.16	118.55	75.44	89.82	94.18	72.95	63.2	71.98	59.28	66.05	57.52	116.35	142.27	104.22	65.51	72.95	70.19
Egr1	Acute, Repeated	induced	6.11192e-05	523.77	533.16	605.14	472.41	787.51	894.73	856.65	1027.1	458.33	604.62	499.34	400.24	475.41	539.45	693.23	575.79	947.65	960.32	848.59	651.04	878.61	850.33	653.68	679.29	889.61	583.36	639.83	382.94	548.38	563.69	772.29	720.48	606.07	524.1	403.98	535.63
Egr2	Acute, Challenge	induced	3.9363e-25	17.27	18.69	22.94	12.53	66.92	53.92	58	82.56	13.59	21.37	15.33	9.83	15.76	12.48	21.93	32.74	67.16	60.84	62.22	52.64	34.35	28.87	23.29	32.06	22.87	25.28	23.99	16.02	11.01	5.23	53.16	21.89	22.45	6.44	17.33	16.62
Egr4	Acute, Repeated, Challenge	induced	1.53238e-41	112.81	153.46	136.71	120.51	236.53	279.6	235.79	364.64	108.71	168.3	165.35	101.85	98.06	109.67	168.55	153.09	383.66	379.26	371.58	372.02	172.84	183.48	236.19	242.46	212.33	131.26	185.55	147.41	120.08	145.37	285.85	257.19	164.35	149.28	121.28	143.14
Eml5	Challenge	induced	0.00214187	244.04	215.43	224.66	236.21	232.86	259.63	221.53	208.37	205.08	226.18	183.97	172.42	226.76	205.97	139.11	129.98	118.69	122.7	126.17	96.51	130.74	103.38	99.8	102.19	150.26	197.37	214.34	181.05	166.11	161.05	209.62	153.22	194.81	170.76	158.67	214.25
Errfi1	Acute, Challenge	induced	0.0319257	124.32	132.8	146.27	115.69	123.76	143.8	138.81	167.09	108.71	96.17	106.22	116.14	91.06	108.78	114.86	111.69	171.13	166.31	126.17	140.38	148.47	145.29	129.74	160.31	137.2	81.67	100.77	108.95	141.1	129.68	130.39	154.13	141.1	152.5	173.26	144.07
Fos	Acute, Repeated, Challenge	induced	4.48377e-26	14.96	47.22	21.99	22.17	59.59	42.94	68.46	69.78	22.24	19.59	24.09	13.4	19.26	18.72	28.28	24.07	127.89	136.9	115.8	89.5	87.53	76.37	69.86	62.12	62.07	35	43.19	20.83	21.01	29.28	65.19	65.66	31.27	32.22	24.62	23.09
Fosb	Acute, Repeated, Challenge	induced	3.35312e-17	69.07	83.61	62.14	49.17	154.94	140.8	117.9	168.07	54.36	116.65	89.79	54.5	77.05	80.25	78.5	65.47	178.49	203.83	139.99	147.4	116.34	136.91	126.41	142.27	114.33	84.59	94.37	62.49	30.02	35.56	125.37	90.29	76.96	47.25	34.65	62.8
Fosl2	Acute, Repeated	induced	1.39274e-10	87.49	83.61	66.92	80.98	146.68	192.73	156.88	192.64	60.53	99.73	116.07	88.45	75.3	113.24	117.17	98.21	213.45	220.05	181.47	170.22	130.74	167.65	169.66	106.2	184.02	117.64	102.37	81.71	85.06	86.8	186.55	121.3	125.06	91.29	75.69	83.12
Gjb6	Repeated	down-regulated	0.0419475	197.99	189.85	137.66	183.18	152.18	171.76	162.58	165.12	186.54	158.5	214.63	237.64	200.5	198.84	207.8	249.38	179.41	184.56	172.83	171.97	254.83	200.24	172.98	164.31	226.49	259.59	230.34	174.64	368.25	229.03	191.57	209.76	227.68	186.87	307.31	325.07
Gm13889	Acute, Repeated, Challenge	induced	7.99453e-10	309.65	379.7	369.01	349.01	555.57	445.37	440.21	532.72	368.15	445.23	382.17	359.14	360.72	410.16	386.15	357.22	561.23	531.37	499.48	594.88	470.88	396.76	394.2	398.76	389.82	416.13	419.09	379.73	328.23	375.44	524.56	426.82	420.08	426.37	413.1	381.41
Jkamp	Acute	down-regulated	0.018713	439.73	454.46	440.71	409.74	414.38	379.46	453.52	403.96	365.68	353.51	298.94	339.49	325.7	327.23	437.53	510.31	448.07	455.31	433.8	470.29	471.99	437.74	392.54	382.73	523.75	428.77	492.67	445.42	360.25	434.01	459.36	440.5	420.88	402.74	460.52	456.21
Junb	Acute, Repeated, Challenge	induced	6.47754e-43	463.91	592.18	549.7	442.52	782.93	969.62	859.5	1215.81	357.03	448.79	459.92	414.53	408	411.05	537.38	624.89	1021.26	844.71	841.68	1063.42	737.9	643.57	557.21	577.1	622.84	502.66	579.04	432.61	484.33	437.14	1002.98	1068.87	587.64	457.51	480.58	581.81
Kdm6b	Challenge	down-regulated	0.013054	50.65	48.2	80.3	72.31	91.68	78.89	77.96	103.2	58.06	60.55	68.99	67.9	52.53	72.22	57.72	56.81	62.56	47.66	51.85	64.93	50.97	35.39	29.94	26.05	65.33	67.09	71.98	64.09	48.03	36.6	73.22	66.58	53.71	88.07	44.68	54.49
Klf9	Acute	down-regulated	0.029662	202.6	252.81	237.09	208.25	178.77	181.74	166.39	212.3	143.31	184.33	150.02	94.7	157.6	163.17	115.44	138.65	146.29	177.46	127.89	200.05	142.93	158.33	172.98	196.37	148.09	119.59	156.76	142.6	202.14	167.33	202.6	214.32	210.04	223.39	201.53	261.35
Lmo4	Acute	down-regulated	0.0397394	1152.28	1284.7	1207.42	1416.27	1301.82	1137.39	1251.22	1241.36	1042.67	1002.66	1059.99	921.97	978.85	1171.62	1165.96	1439.46	1415.04	1420.7	1168.32	1263.46	1117.93	1059.89	1087.8	1076.05	1339.32	1143.38	1106.9	1227.32	1274.88	1287.38	1364.05	1339.73	1167.25	1369.31	1405.26	1264.28
Ly6a	Acute	induced	0.0109164	158.86	151.49	178.77	193.79	172.35	192.73	203.47	180.85	214.96	203.03	249.67	209.95	226.76	246.09	166.24	170.42	152.73	169.35	207.39	194.78	191.68	152.74	146.37	190.36	252.62	213.9	223.94	190.67	262.18	193.47	167.5	146.83	193.21	211.57	195.15	169
Mag	Challenge	induced	0.00153007	940.48	802.69	790.61	850.34	866.35	893.73	913.7	1039.88	972.26	919.85	869.46	927.33	866.78	979.92	583.56	428.47	706.6	766.63	786.37	851.08	571.71	583.03	645.36	681.3	474.75	517.25	638.23	512.72	800.55	778.08	724.15	834.48	934.76	620.76	1077.88	876.41
Mest	Acute, Challenge	induced	0.0149642	97.85	148.54	126.19	110.87	194.36	155.78	146.42	155.29	133.42	154.05	162.07	106.31	133.96	113.24	144.88	103.03	178.49	201.8	155.55	184.26	209.4	185.34	172.98	188.36	179.66	145.84	135.96	141	107.07	118.18	158.47	131.33	144.3	115.99	103.96	121.9
Mob2	Acute, Repeated	induced	0.0274562	150.8	164.28	139.57	167.75	143.93	124.82	115.99	142.52	235.96	153.16	179.59	167.96	180.36	164.95	140.26	139.61	126.05	170.36	221.22	173.73	199.43	188.14	237.85	230.44	162.24	209.04	212.74	169.84	200.14	185.11	146.44	166.9	174.77	152.5	128.58	147.76
Nedd9	Acute, Challenge	induced	0.0484791	28.78	14.76	24.86	30.85	35.75	35.95	47.54	37.35	24.71	24.04	23	17.87	32.39	16.05	34.06	16.37	43.24	42.59	31.11	70.19	24.38	21.42	34.93	30.06	26.13	21.39	17.6	25.64	24.02	27.19	36.11	43.78	43.29	34.37	23.71	31.4
Nfkbia	Repeated, Challenge	induced	0.012844	123.17	180.01	110.9	99.3	189.77	154.78	154.03	154.31	117.36	133.57	122.64	111.67	107.69	128.4	122.37	132.87	163.77	140.95	169.37	131.61	142.93	110.83	139.72	96.18	112.15	117.64	87.98	92.93	122.08	116.08	178.53	190.61	140.29	154.65	152.29	225.34
Nr4a1	Acute, Repeated	induced	3.85081e-14	224.47	233.13	297.31	203.43	357.54	427.39	396.47	531.73	119.83	170.97	220.1	149.2	154.09	198.84	274.75	320.63	416.78	370.13	397.51	405.36	372.27	283.13	349.3	224.43	299.44	202.23	307.12	190.67	158.11	170.47	381.13	375.75	263.75	182.58	165.06	244.73
Nr4a3	Acute, Repeated	induced	3.9363e-25	77.13	51.15	81.26	71.34	169.6	196.72	189.2	232.94	95.13	111.31	98.55	55.39	53.41	62.42	148.92	129.02	275.1	264.67	267.88	142.14	214.94	203.97	209.58	208.4	212.33	128.34	142.36	92.93	85.06	74.25	186.55	145.01	156.33	106.32	61.1	95.12
Per1	Acute, Repeated	induced	1.78599e-07	349.94	381.67	369.01	329.72	451.97	529.25	485.85	569.08	370.62	406.94	385.45	360.93	363.35	410.16	292.65	350.48	347.78	385.34	392.32	365	351.22	355.78	350.96	382.73	348.44	268.35	345.51	267.57	370.26	366.03	503.5	478.8	420.08	411.33	407.62	371.25
Polr3e	Repeated, Challenge	induced	1.40909e-05	143.89	153.46	146.27	163.9	170.52	178.75	173.04	156.28	158.13	136.24	120.45	146.52	156.72	131.96	100.43	124.21	139.85	122.7	146.9	133.37	115.23	162.99	153.02	144.27	80.58	121.53	76.78	104.15	116.08	110.85	125.37	144.1	159.54	155.73	206.09	213.33
Retreg3	Acute	induced	0.024394	54.1	56.07	64.05	53.99	56.84	78.89	92.23	67.82	129.72	101.51	79.94	108.99	137.46	79.36	121.79	94.36	115.93	106.48	107.15	98.27	110.8	107.11	139.72	88.17	91.47	82.64	116.77	121.77	91.06	104.58	112.33	94.85	101.81	105.25	86.63	74.8
Rpl39	Acute	down-regulated	0.00214187	1902.82	1795.23	1800.13	1707.43	1631.86	1619.7	1524.1	1769.17	1524.48	1456.79	1427.93	1406.19	1413.11	1394.53	2035.24	2099.98	2009.39	1933.82	2092.96	1856.59	1927.85	1970.76	1803.03	1805.44	2084.11	1929.95	1567.58	1720.81	1934.34	2058.14	1902.65	1948.95	1823.03	1767.76	1861.21	1814.69
Rpl7	Acute	down-regulated	1.69392e-05	1169.55	1085.99	1105.13	1117.4	1071.71	1018.56	1045.86	1095.9	889.49	920.74	895.74	919.29	911.43	902.35	1273.32	1337.4	1313.83	1326.39	1484.6	1467.02	1417.08	1269.45	1561.85	1476.81	1254.39	1176.44	1238.06	1262.57	1149.79	1132.6	1129.35	1042.42	945.19	1052.49	1103.41	1095.28
Scrt2	Repeated, Challenge	induced	0.0179391	147.35	112.14	140.53	110.87	148.52	169.76	158.78	164.14	116.13	121.99	150.02	89.34	127.83	127.51	72.15	84.73	103.97	101.41	107.15	117.57	107.47	113.63	129.74	120.23	103.44	97.23	123.17	83.32	77.05	98.31	109.32	110.35	116.24	143.91	127.67	135.76
Sgk1	Acute, Challenge	induced	4.2971e-07	293.54	372.82	259.07	254.52	384.13	523.26	409.79	405.93	254.49	292.07	308.8	277.84	237.27	279.09	226.27	282.12	442.55	456.33	387.14	280.77	198.32	319.46	231.2	230.44	209.06	210.98	195.15	163.43	419.29	209.16	431.28	371.19	276.58	288.9	476.02	531.94
Tiparp	Acute, Repeated, Challenge	induced	2.41445e-11	51.8	60.99	56.4	59.77	100.85	98.86	73.21	90.42	46.95	47.19	56.94	38.42	43.78	36.56	53.1	79.92	103.05	100.39	107.15	91.25	63.15	72.65	51.56	66.13	68.6	55.42	76.78	35.25	37.03	23.01	89.27	61.1	55.32	41.88	60.19	60.03

## Sheet: LCtx
Supplementary Table S4: Normalized reads of induced genes (limbic cortex)
SYMBOL	Experiment	Type	p_adjusted	PFC_Acute_0h	PFC_Acute_0h.1	PFC_Acute_0h.2	PFC_Acute_1h	PFC_Acute_1h.1	PFC_Acute_2h	PFC_Acute_2h.1	PFC_Acute_4h	PFC_Challenge_0h	PFC_Challenge_0h.1	PFC_Challenge_1h	PFC_Challenge_1h.1	PFC_Challenge_1h.2	PFC_Challenge_1h.3	PFC_Challenge_2h	PFC_Challenge_2h.1	PFC_Challenge_2h.2	PFC_Challenge_2h.3	PFC_Challenge_4h	PFC_Challenge_4h.1	PFC_Challenge_4h.2	PFC_Repeated_0h	PFC_Repeated_0h.1	PFC_Repeated_1h	PFC_Repeated_1h.1	PFC_Repeated_2h	PFC_Repeated_2h.1	PFC_Repeated_4h
Arc	Acute, Repeated, Challenge	induced	1.6278e-05	661.65	387.65	439.81	1022.81	1107.16	662.59	298.84	373.36	370.17	546.9	1008.52	946.56	914.74	974.58	782.76	536.17	533.8	315.26	556.54	561.21	303.41	477.14	308.72	999.89	1234.22	674.39	455.7	271.16
Arl4d	Acute, Repeated, Challenge	induced	1.90904e-12	44.42	32.01	36.74	94.46	82.27	57.54	43.54	44.45	39.7	47.69	123.12	114.88	86.58	113.73	49.29	52.36	65.36	52.54	48.23	36.12	40.54	70.86	46.08	94.47	79.79	62.35	46.61	45.77
Bhlhe40	Acute, Repeated, Challenge	induced	4.60477e-06	315.7	375.79	386.75	404.76	329.06	470.79	488.83	312.12	359.44	375.53	408.3	451.14	355.73	369.19	472.56	515.23	475.25	452.68	362.68	312.55	368.51	341.32	312.4	424.49	441.36	518.52	443.27	327.22
Btg2	Repeated, Challenge	induced	1.24418e-05	126.66	65.2	78.57	136.1	103.69	95.03	73.23	72.1	60.09	98.35	129.46	142.4	112.93	122.48	81.18	46.08	54.47	56.59	81.63	72.23	51.59	51.97	73.72	130.05	116.45	73.78	49.71	56.06
Cbfa2t3	Acute, Repeated	induced	0.00726903	162.58	193.23	202.05	194	155.96	273.76	212.75	254.84	265.02	251.84	248.06	184.29	235.27	215.21	324.7	241.91	295.5	233.08	273.63	338.95	254.27	146.45	163.11	180.35	250.15	316.93	266.17	194.5
Cldn5	Acute, Repeated, Challenge	induced	0.000159771	57.66	98.39	74.49	86.84	59.13	122.06	96.97	155.07	144.85	132.63	119.5	106.5	120.46	115.48	156.55	102.63	115.75	118.56	143.77	234.76	199	152.35	161.27	109.19	119.32	115.34	64.21	171.62
Ctgf	Repeated, Challenge	induced	0.0140784	69	28.45	42.86	73.13	43.7	64.52	42.55	41.48	33.26	40.24	63.37	68.21	88.46	68.24	75.38	42.94	51.75	36.38	37.1	37.51	45.45	20.08	26.72	114.1	56.07	41.56	53.86	35.47
Cyr61	Repeated, Challenge	induced	3.86589e-06	21.74	9.48	12.25	18.28	29.14	11.33	7.92	9.88	5.36	2.98	31.69	11.97	33.88	40.24	2.9	8.38	13.62	6.74	10.2	12.5	11.06	5.91	4.61	45.39	20.85	14.55	10.36	3.43
Ddit4	Acute, Challenge	induced	0.000159771	221.18	182.56	187.76	325.53	299.93	236.27	141.5	197.55	159.87	183.29	353.07	288.4	306.79	206.46	258.02	228.29	235.58	202.09	214.27	177.81	154.78	233.84	151.13	285.86	316.28	244.19	257.88	226.54
Dusp1	Acute, Repeated, Challenge	induced	5.85135e-07	165.41	122.1	116.33	232.59	155.96	133.39	97.96	88.9	120.17	177.33	147.57	186.68	124.22	183.72	121.76	129.85	83.07	79.49	119.66	90.29	95.81	68.5	108.74	235.56	212.05	123.66	94.25	97.25
Ecel1	Acute	induced	0.0152887	8.51	14.23	16.33	16.25	291.36	11.33	17.81	30.62	21.46	16.39	23.54	29.92	15.06	40.24	34.79	40.84	42.21	26.95	29.68	22.23	24.57	21.26	26.72	22.08	23	17.67	25.89	26.31
Egr2	Acute, Repeated, Challenge	induced	7.01543e-12	22.69	37.93	31.63	68.05	71.98	55.8	44.53	34.57	33.26	43.22	138.51	140.01	95.99	59.49	31.89	34.56	42.21	68.71	38.03	48.62	15.97	18.9	25.8	68.7	87.7	42.6	43.5	16.02
Egr4	Repeated, Challenge	induced	1.18046e-08	271.27	155.3	238.78	307.25	405.33	370.53	274.1	168.9	299.36	238.43	648.21	623.46	461.13	395.43	440.67	366.52	439.84	466.15	233.74	277.82	212.51	153.53	164.03	323.89	392.48	383.44	259.96	184.2
Fos	Acute, Repeated, Challenge	induced	1.53299e-09	99.25	48.6	44.9	165.05	211.66	118.57	70.26	56.3	82.62	111.76	281.55	244.12	165.63	216.96	107.27	125.67	117.11	171.1	79.77	102.8	41.76	30.71	45.16	123.91	183.3	99.76	70.43	30.89
Fosb	Repeated, Challenge	induced	0.0481996	89.79	86.54	46.94	72.62	98.55	108.98	77.18	63.21	138.41	159.45	246.25	259.68	222.1	197.72	284.11	208.4	258.73	171.1	139.13	179.2	88.44	51.97	61.74	100.6	107.82	123.66	77.68	84.67
Foxo6	Acute, Repeated	induced	0.00754861	95.47	84.17	123.47	133.56	136.25	156.93	123.69	80.99	111.59	108.78	123.12	160.35	127.99	110.23	118.86	157.08	170.22	111.82	93.68	120.85	147.4	61.41	73.72	100.6	108.54	148.59	141.89	73.22
Gadd45b	Acute, Repeated, Challenge	induced	1.48065e-07	79.4	105.51	84.7	130.01	125.11	86.31	103.9	72.1	104.08	111.76	183.78	186.68	186.34	264.2	171.05	128.81	183.84	142.81	113.16	145.86	93.36	82.67	82.02	161.94	159.58	97.68	104.6	94.96
Gm13889	Acute, Repeated, Challenge	induced	2.28551e-09	115.32	120.92	133.68	212.28	323.06	197.91	188.01	136.31	286.48	254.82	344.93	329.08	346.32	290.45	327.6	264.95	299.58	305.83	249.51	225.04	197.77	131.09	152.98	208.57	238.65	178.73	233.03	172.76
Ier2	Repeated	down-regulated	0.0443848	52.93	33.19	38.78	55.86	47.13	37.49	22.76	43.46	22.53	46.2	43.46	27.52	62.11	78.74	57.98	26.18	29.96	20.21	28.75	37.51	41.76	29.53	20.27	55.21	64.69	21.82	32.11	9.15
Inhba	Acute, Repeated	down-regulated	0.0459587	65.22	54.53	50	30.98	20.57	39.23	36.61	63.21	49.36	61.1	28.97	46.67	56.47	47.24	28.99	40.84	51.75	40.42	76.99	63.9	51.59	66.14	63.59	25.76	43.85	39.49	46.61	58.35
Junb	Acute, Repeated, Challenge	induced	1.51251e-38	817.61	688.75	589.82	1395.57	1343.67	836.09	659.03	637.09	650.22	657.17	1604.22	1571.22	1200.83	1464.5	1107.46	812.64	766.66	789.5	695.67	643.16	415.19	527.92	606.37	1338.5	1451.3	899.88	818.19	507.99
Klhl13	Acute	induced	0.00754861	82.23	64.02	74.49	92.94	239.08	74.98	55.41	44.45	130.9	83.45	117.69	129.24	120.46	131.23	75.38	123.57	119.83	107.78	137.28	83.35	82.3	100.39	106.9	89.56	89.13	114.3	94.25	132.72
Lingo1	Acute	down-regulated	0.023983	1621.03	1803.09	1849.05	1520.5	1115.73	1905.83	1798.97	1950.77	1780.05	1759.92	1534.51	1761.48	1885.94	1886.17	1774.26	1727.9	1651.8	1809.38	1841.2	2269.82	2228.27	1894.38	1940.76	1607.18	1725.89	1996.16	1796.9	2038.84
Ly6a	Acute	induced	0.00443933	139.89	155.3	129.6	120.87	126.83	213.6	193.95	248.91	243.56	266.74	182.87	191.47	244.68	309.7	197.14	198.97	193.37	167.06	258.79	283.38	248.13	394.47	271.85	188.94	284.65	245.23	243.38	297.47
Ly6c1	Acute, Repeated	down-regulated	0.000983008	282.62	327.19	270.42	236.66	174.81	340.01	378.99	404.97	358.37	436.63	312.33	317.12	449.84	330.69	284.11	382.23	298.22	327.39	396.07	459.8	395.54	549.18	425.75	345.97	378.1	445.78	386.31	549.18
Nptx2	Acute	down-regulated	0.0396478	194.71	189.67	223.48	143.21	73.7	214.47	168.22	257.8	284.34	272.7	212.75	303.95	252.21	299.2	275.42	273.32	288.69	246.55	320.94	404.23	261.64	205.5	225.78	114.1	189.77	184.96	157.42	232.26
Nr4a1	Acute, Repeated, Challenge	induced	0.000109658	416.84	398.32	317.36	630.24	559.58	413.25	304.78	364.47	311.16	378.51	577.59	491.83	466.78	486.42	345	320.45	340.44	254.63	332.99	357	202.68	377.93	297.66	536.14	657	467.61	284.81	268.87
Nts	Acute	induced	0.0136958	10.4	4.74	10.2	6.6	260.51	6.97	8.91	3.95	32.19	40.24	50.7	33.51	26.35	48.99	37.69	46.08	17.7	14.82	34.32	30.56	28.25	23.62	22.12	24.54	11.5	15.59	30.03	20.59
Per1	Acute, Repeated, Challenge	induced	1.39934e-08	368.63	315.33	285.72	523.08	581.86	487.35	377.01	356.57	350.86	290.59	449.94	528.92	419.73	365.69	394.28	347.67	400.35	436.51	300.53	305.61	289.9	361.4	303.19	522.64	452.86	487.35	422.56	305.48
Pitpnm2	Acute, Challenge	down-regulated	0.00211747	887.55	1143.97	1011.26	835.41	748.1	1020.92	901.46	1165.52	979.62	801.72	750.51	759.88	867.68	925.59	530.54	720.48	754.41	753.12	961.88	1011.28	1029.38	1139.7	1016.46	923.82	919.37	1099.39	1047.07	1204.77
Ramp2	Acute	down-regulated	0.0199976	87.9	69.94	67.35	45.71	35.13	114.21	77.18	111.61	93.35	101.33	101.4	83.77	97.87	101.48	110.17	91.11	89.88	123.95	91.83	113.91	121.61	88.58	105.06	105.51	104.23	91.44	109.78	124.71
Sertad1	Repeated, Challenge	induced	0.000981537	101.14	86.54	92.86	92.43	115.69	83.7	87.08	80.01	130.9	96.86	130.37	157.96	141.16	164.47	278.32	184.31	167.49	141.46	103.89	95.85	111.78	72.04	70.04	109.19	128.67	123.66	107.71	66.36
Tiparp	Acute	down-regulated	0.0240983	38.75	22.52	35.72	56.37	80.55	43.59	25.73	13.83	33.26	31.29	87.82	61.03	35.76	48.99	31.89	38.75	68.09	22.9	26.9	27.78	25.8	41.34	23.04	36.81	38.1	50.92	33.14	33.18
Tob2	Repeated, Challenge	induced	0.0135772	101.14	71.13	69.39	90.9	93.41	67.13	55.41	66.18	56.87	50.67	109.54	71.8	90.34	68.24	37.69	55.5	57.19	48.5	64.93	45.84	40.54	82.67	52.53	121.46	126.51	93.52	95.28	65.22
Zbtb7a	Acute	down-regulated	0.0185526	406.44	380.53	345.93	311.82	309.35	345.25	366.13	394.11	344.42	384.47	334.06	329.08	355.73	314.95	266.72	299.5	356.78	336.82	419.26	455.63	433.62	536.19	449.71	355.79	401.82	426.04	331.42	347.82
Zfp189	Challenge	induced	0.00932278	20.79	14.23	14.29	31.99	19.71	15.69	13.85	6.91	13.95	11.92	43.46	34.7	32	24.5	28.99	33.51	32.68	33.68	17.62	6.95	8.6	18.9	15.67	18.4	23	20.78	12.43	12.59
Zic1	Acute, Repeated	induced	0.0240699	108.7	113.8	89.8	126.96	1093.45	118.57	134.58	139.27	98.71	152	135.8	128.04	159.98	129.48	110.17	114.15	171.58	125.3	119.66	72.23	111.78	109.84	103.21	152.13	153.11	121.58	108.75	125.85

## Sheet: STR
Supplementary Table S4: Normalized reads of induced genes (Dorsal Striatum)
SYMBOL	Experiment	Type	p_adjusted	STR_Acute_0h	STR_Acute_0h.1	STR_Acute_0h.2	STR_Acute_0h.3	STR_Acute_1h	STR_Acute_1h.1	STR_Acute_1h.2	STR_Acute_1h.3	STR_Acute_2h	STR_Acute_2h.1	STR_Acute_2h.2	STR_Acute_2h.3	STR_Acute_4h	STR_Acute_4h.1	STR_Acute_4h.2	STR_Acute_4h.3	STR_Challenge_0h	STR_Challenge_0h.1	STR_Challenge_0h.2	STR_Challenge_1h	STR_Challenge_1h.1	STR_Challenge_1h.2	STR_Challenge_1h.3	STR_Challenge_2h	STR_Challenge_2h.1	STR_Challenge_2h.2	STR_Challenge_2h.3	STR_Challenge_4h	STR_Challenge_4h.1	STR_Challenge_4h.2	STR_Challenge_4h.3	STR_Repeated_0h	STR_Repeated_0h.1	STR_Repeated_0h.2	STR_Repeated_0h.3	STR_Repeated_1h	STR_Repeated_1h.1	STR_Repeated_1h.2	STR_Repeated_1h.3	STR_Repeated_2h	STR_Repeated_2h.1	STR_Repeated_2h.2	STR_Repeated_2h.3	STR_Repeated_2h.4	STR_Repeated_4h	STR_Repeated_4h.1
Abcb1a	Acute	induced	0.022491	30.52	26.94	42.78	39.42	47.61	32.83	43.35	33.63	56.85	78.61	59.82	53.77	62.5	66.03	60.9	76.96	31.72	51.06	40.3	40.81	36.8	55.3	30.64	47.28	47.45	39.5	49.82	44.28	53.41	51.5	45.43	39.16	40.73	69.38	54.48	53.48	41.61	59.78	62.98	65.78	43.13	50.15	68.82	72.04	54.38	31.89
Abcc9	Acute	induced	0.0323222	25.82	14.7	25.23	22.12	23.37	18.9	13.11	26.03	37.52	41.17	39.02	31.95	28.32	39.8	39.35	36.75	23.07	28.62	18.86	19.05	19.89	18.71	18.57	23.09	32.12	21.19	18.48	26.8	26.71	33.05	30.5	25.4	15.84	28.38	27.72	23.87	13.49	27	24.78	21.53	17.7	28.97	16.48	38.08	38.31	26.34
Abl2	Acute, Challenge	induced	1.69956e-06	164.33	127.37	156.85	183.66	186.97	173.13	177.45	168.13	189.88	298.83	217.19	250.93	206.06	199.9	226.73	234.34	226.37	249.11	228.08	258.47	257.58	258.63	255.36	269.39	339.44	289.01	295.72	294.81	253.72	275.17	251.82	208.5	243.25	221.8	194.97	220.6	205.78	239.13	241.61	271.47	282.02	251.84	253	257.3	203.93	252.34
Acvr1	Acute, Repeated	induced	1.15849e-05	53.99	83.28	77.88	67.31	83.1	94.52	86.71	79.18	85.28	132.88	117.05	92.73	107.42	100.4	108.68	127.57	134.81	133.06	121.76	132.41	135.25	124.43	137.43	95.66	113.88	114.64	90.81	107.21	128.19	148.34	130.45	132.3	169.71	130.34	131.89	113.64	118.07	120.53	98.09	107.63	107.28	99.18	107.6	107.04	85.28	101.21
Adgrf5	Acute	induced	4.28025e-05	25.82	26.94	47.16	41.35	51.07	27.86	47.39	50.98	76.18	90.46	81.93	76.37	86.92	52.46	73.08	101.22	65.61	47.19	53.16	44.44	44.75	50.42	41.79	38.48	40.88	26.97	61.88	51.27	59.65	65.33	56.47	60.33	32.81	79.89	66.9	47.75	40.48	54.96	82.6	63.38	54.19	49.03	63.01	60.72	79.1	59.62
Adgrl4	Acute	induced	0.0092651	23.48	39.19	30.71	40.39	49.34	41.79	46.38	48.81	59.12	64.88	53.32	77.93	62.5	55.18	76.83	66.56	39.65	34.04	54.02	48.97	45.75	55.3	55.72	61.58	51.1	42.39	46.61	73.41	50.74	58.42	67.5	51.86	30.55	77.79	64.99	54.43	34.86	50.14	70.21	35.88	30.97	32.32	55.25	71.02	80.34	34.66
Adora1	Acute	induced	0.000177402	420.2	387.01	402.54	409.62	547.07	499.48	548.48	543.45	484.37	499.08	477.29	486.27	428.72	406.13	451.59	406.97	420.31	413.89	460.45	450.74	440.56	403.39	418.79	464.02	491.27	414.24	499.03	489.41	510.11	481.92	408.89	359.85	357.52	375.27	400.46	402.04	337.34	426.19	388.22	410.2	450.13	507.02	397.43	398.3	393.04	440.9
AI413582	Acute	down-regulated	0.023656	362.69	347.82	361.96	321.16	363.56	310.44	351.87	339.52	300.17	268.26	284.81	258.72	302.74	339.2	276.39	255.83	257.37	209.65	233.23	232.17	262.55	215.52	232.15	235.31	223.37	262.03	236.26	258.69	255.5	221.36	270	189.45	204.78	163.98	170.12	260.71	272.12	211.17	218.89	259.52	217.88	255.18	170.61	205.84	231.12	235.7
Apold1	Repeated, Challenge	induced	3.65974e-05	9.39	7.35	7.68	0.96	13.85	10.94	18.15	9.76	3.41	13.1	9.1	12.47	4.88	1.81	11.24	4.85	15.86	13.93	18.01	36.28	30.83	31.72	16.71	14.29	12.41	15.41	19.29	12.82	12.46	13.84	11.68	13.76	5.66	8.41	5.73	25.78	14.62	26.03	18.59	8.37	25.44	15.6	11.63	16.47	8.65	6.93
Arc	Acute, Repeated, Challenge	induced	2.84305e-33	408.47	702.99	592.3	454.82	2215.96	1870.58	2408.67	2955.87	229.68	783.56	334.23	617.19	387.71	463.12	350.4	308.52	433.28	287.01	847.17	1640.63	1403.24	1310.22	2304.75	572.87	355.5	974.92	486.17	666.54	246.6	528.04	373.84	209.56	326.97	212.34	344.07	1473.51	1242.54	1563.03	1405.23	212.87	382.67	513.71	423.61	208.93	412.81	206.59
Arhgap26	Acute, Repeated	down-regulated	5.34251e-05	123.24	151.87	116.27	101.92	96.95	105.47	91.75	103.05	126.21	99.82	115.75	120.01	135.75	147.44	139.6	169.86	129.05	176.39	119.19	121.53	114.37	104.1	155.07	160.54	127.02	128.13	112.5	146.82	131.76	170.63	128.51	125.95	124.45	186.06	179.68	111.73	97.83	97.39	90.86	120.79	91.8	111.43	121.17	150.26	170.56	137.26
Arhgap39	Repeated	induced	0.0320365	169.02	203.3	128.33	147.12	123.78	131.34	125.02	135.59	147.81	136.62	172.97	141.83	131.84	118.49	143.35	122.02	101.65	88.97	97.75	127.88	118.35	86.21	100.29	146.24	109.5	135.83	97.23	99.05	124.63	142.96	106.44	89.96	81.46	100.91	114.69	102.18	84.34	76.17	91.89	93.28	138.25	130.38	148.31	126.59	105.06	105.37
Arhgef3	Acute, Repeated	induced	1.28005e-05	170.19	215.55	189.75	201.93	239.77	244.77	233.91	250.57	230.81	246.42	256.2	231.45	231.45	217.99	190.19	207.3	275.4	235.18	238.37	220.38	246.64	282.21	221.93	241.9	296.37	300.57	308.58	234.22	265.29	191.39	271.29	204.27	261.35	191.31	214.09	209.14	224.89	268.06	233.35	350.41	315.2	354.36	247.18	269.65	205.17	252.34
Arid3b	Acute	induced	2.96902e-06	32.87	31.84	40.58	38.46	94.35	69.65	79.65	91.12	48.89	46.17	57.22	28.83	46.88	43.42	47.78	50.61	34.6	27.08	55.73	48.07	107.41	67.5	47.36	31.89	46.72	48.17	53.04	53.6	24.04	44.58	33.75	39.16	44.12	41	30.58	59.21	61.85	61.71	49.56	60.99	65.25	44.57	41.68	27.79	51.91	44.37
Arid5b	Repeated	induced	0.000226825	80.99	71.03	70.2	65.39	73.58	100.49	67.55	73.76	84.14	119.78	98.84	108.32	73.24	94.98	100.25	79.04	95.88	58.8	89.18	95.23	119.34	83.77	72.43	107.76	140.89	135.83	103.66	61.76	76.56	90.7	88.92	77.26	101.83	60.97	85.06	76.4	59.6	107.99	80.54	104.05	106.17	104.75	102.75	110.12	119.89	117.85
Arl4d	Acute, Repeated, Challenge	induced	1.31989e-38	84.51	110.23	144.78	117.31	225.06	223.87	281.3	259.25	92.1	109.17	78.03	106.76	90.82	148.34	95.56	83.2	151.4	126.87	216.94	270.26	236.69	232.6	298.08	129.75	133.59	161.84	147.86	116.53	97.93	142.19	133.05	153.46	202.52	154.52	133.81	253.07	276.62	260.34	313.88	137.53	151.52	161.58	153.16	189.37	160.68	164.99
Arl5b	Acute, Challenge	induced	1.28221e-34	37.56	22.05	41.68	38.46	180.91	130.34	149.22	138.84	50.03	112.92	96.24	121.57	42.97	54.27	35.6	43.68	59.84	49.51	67.74	130.6	138.24	135.01	117.93	82.47	157.67	90.56	115.72	81.57	58.76	56.88	66.2	46.57	53.18	39.94	70.73	80.22	60.72	97.39	75.37	70.56	69.68	62.4	62.04	61.75	69.21	54.07
Atf4	Acute, Repeated, Challenge	induced	1.35672e-10	348.6	296.38	272.02	275	399.05	381.08	391.2	373.14	277.43	351.85	254.9	339.77	262.7	275.88	293.25	280.1	259.54	283.15	288.11	372.75	340.12	353.78	394.65	303.48	305.13	373.78	278.04	282	262.62	275.17	299.2	244.48	248.91	290.12	246.58	331.37	327.22	339.41	337.63	255.93	284.23	293.07	287.9	301.56	207.64	282.84
Baiap2	Acute	induced	6.3174e-05	1565.78	1751.35	1841.6	1841.38	2217.69	2253.65	2211.06	2440.63	1773.74	2035.01	2444.97	2080.69	2057.67	2328.26	2227.97	1974.56	2671.07	2205.59	2680.41	2736.2	3287.83	2663.54	3101.48	2903.95	3595.13	3260	3314.81	2828.12	2930.67	2836.2	3025.76	2396.16	2470.96	2448.17	2378.87	2307.19	2228.69	2769.28	2424.31	2573.63	2402.17	2792.53	2621.13	2458.77	3144.29	3011.45
Banp	Repeated	induced	0.00535089	75.12	97.98	96.52	76.92	96.08	99.5	74.61	57.49	113.7	106.68	89.74	125.46	100.59	100.4	109.62	73.49	108.86	92.83	116.61	126.97	101.44	124.43	103.07	147.34	118.99	138.72	136.61	122.35	97.04	129.9	78.53	97.37	92.77	84.09	69.77	82.13	60.72	90.64	81.57	123.18	120.55	119.23	104.69	106.01	79.1	94.28
Bcl6	Acute, Challenge	induced	2.75691e-08	72.77	24.49	66.91	63.46	112.53	90.54	86.71	83.52	71.63	87.34	80.63	106.76	49.81	60.6	42.16	51.31	68.49	44.87	62.59	95.23	84.53	103.29	67.79	89.06	109.5	107.9	85.18	82.73	60.54	63.03	58.41	44.45	33.94	59.92	47.79	53.48	61.85	69.42	89.83	51.42	95.11	61.29	83.36	71.02	54.38	49.91
Bhlhe40	Acute, Repeated	induced	5.74668e-08	61.04	105.33	62.52	89.42	148.88	176.11	142.16	175.73	130.76	110.42	149.56	88.84	96.68	81.41	64.65	110.24	75.7	92.06	93.46	107.02	138.24	104.1	165.29	96.76	163.51	90.56	167.95	79.24	96.15	100.69	129.81	83.61	139.16	95.66	85.06	129.88	120.32	133.06	139.39	131.55	163.68	180.52	110.51	106.01	74.16	91.51
Brd2	Challenge	induced	0.0129247	219.49	235.15	228.14	200	283.92	247.75	275.25	275.52	237.64	267.63	257.5	299.24	245.12	202.61	242.66	253.75	276.84	274.64	270.1	289.31	312.27	274.08	305.51	303.48	357.69	311.16	354.38	292.48	245.71	285.93	268.05	254.01	269.27	257.54	293.42	288.4	326.1	298.91	268.45	284.63	266.54	290.84	323.76	293.32	255.84	232.93
Brinp2	Repeated	induced	1.81258e-05	124.42	159.21	123.94	108.66	119.45	107.46	99.82	119.32	105.74	123.52	110.54	123.91	136.72	140.2	164.9	144.21	109.58	93.61	112.33	100.67	123.32	83.77	119.79	153.94	131.4	113.68	114.11	144.49	140.66	132.97	184.97	106.9	147.08	116.68	125.2	100.27	93.33	124.39	109.45	120.79	124.97	172.72	132.8	145.12	190.34	138.65
Btg2	Acute, Repeated, Challenge	induced	7.66366e-19	69.25	56.34	21.94	18.27	77.9	95.52	94.77	145.35	27.29	42.42	20.81	32.73	21.48	28.94	30.92	26.35	28.12	16.25	40.3	137.85	84.53	68.32	215.43	31.89	29.93	52.98	34.55	45.45	30.27	36.89	25.96	22.23	18.1	32.59	27.72	89.77	84.34	74.25	99.12	27.51	13.27	24.52	57.19	39.11	35.84	15.25
Cacnb2	Acute	induced	6.47364e-06	260.57	338.02	256.66	247.12	203.42	274.62	220.8	216.94	241.05	219.6	232.79	219.76	344.74	332.87	255.78	406.28	211.23	235.95	222.94	149.64	189.95	173.23	207.07	195.72	221.18	246.62	229.83	230.72	235.91	202.92	315.43	291.05	349.6	247.02	245.63	237.79	260.88	197.67	207.53	296.59	221.19	300.87	218.1	264.51	331.24	293.94
Car12	Acute	induced	0.00119743	218.32	176.36	236.92	198.08	224.19	233.82	261.13	233.22	214.9	299.45	270.51	303.14	292	311.16	349.47	354.28	292.7	276.18	304.4	285.68	306.31	351.34	319.43	299.08	348.2	322.72	321.44	308.8	358.77	365.86	347.23	200.03	155	237.56	280.04	279.8	269.87	301.81	235.41	239.18	321.84	328.73	285.96	185.26	220	357.71
Ccdc6	Challenge	induced	0.00244439	157.28	257.19	180.98	201.93	186.11	190.04	216.77	220.2	202.39	299.45	254.9	293.79	166.02	192.67	165.83	208.69	181.68	169.42	143.2	227.64	184.98	196.82	167.15	234.21	240.16	210.01	234.65	189.94	151.34	159.87	149.28	123.83	193.47	142.96	158.66	147.06	111.32	210.2	192.05	165.04	152.62	240.7	226.83	170.85	122.36	148.35
Ccnd2	Acute	induced	0.00268491	419.03	426.2	355.38	343.27	529.75	512.42	444.63	577.07	352.47	376.18	487.69	413.8	322.27	404.33	350.4	423.61	764.19	596.46	674.82	733.7	868.2	635.18	687.15	668.54	803.7	800.55	736.89	696.83	564.41	495.76	337.49	603.27	794.24	623.34	582.05	856.6	615.08	759.82	656.67	718.75	682.38	690.89	775.48	693.68	692.14	501.91
Ccnl1	Repeated	induced	0.00234064	180.76	149.42	178.79	143.27	197.36	154.22	183.5	211.52	143.26	162.83	141.76	177.68	157.23	135.68	146.16	152.53	207.63	191.86	213.51	220.38	278.46	278.96	240.5	205.62	208.04	261.07	223.4	216.74	222.56	195.23	168.75	189.45	224.02	238.62	197.84	255.93	276.62	241.06	306.65	211.68	220.09	225.1	235.55	216.13	190.34	183.02
Ccno	Acute, Repeated	down-regulated	0.000914931	32.87	22.05	41.68	50.96	50.21	38.8	44.36	55.32	26.15	21.21	24.71	29.61	37.11	33.47	31.85	36.05	23.79	39.45	39.44	29.93	25.86	28.47	35.29	30.79	26.28	19.27	28.13	18.64	16.02	39.97	25.96	34.93	26.02	34.69	26.76	31.51	59.6	36.64	46.46	17.94	25.44	21.17	15.51	22.64	33.37	29.12
Cdk13	Challenge	induced	8.86666e-05	99.77	75.93	130.52	104.81	128.98	116.41	127.04	119.32	123.93	155.96	132.65	132.48	113.28	113.97	115.24	113.01	111.02	112.18	132.05	158.71	142.21	164.29	141.15	159.44	189.06	188.82	175.18	124.68	123.74	119.9	127.21	102.66	83.72	120.88	141.45	130.83	112.45	129.21	161.07	113.61	132.72	154.89	160.91	115.27	114.94	117.85
Cdkn1a	Repeated, Challenge	induced	0.0194782	414.33	110.23	71.29	100	152.35	128.35	166.36	148.61	128.48	125.39	150.86	130.92	85.94	111.26	104.93	106.77	99.49	77.36	74.6	127.88	134.26	131.75	128.15	156.14	156.21	154.14	147.86	93.22	88.13	92.23	97.35	69.85	64.49	76.74	54.48	93.59	128.19	104.14	125.97	82.52	80.74	108.09	98.87	82.34	87.75	115.08
Celf3	Acute	induced	8.1047e-06	159.63	198.41	265.44	249.04	309.02	320.39	371.03	330.84	310.4	308.81	314.72	286	308.6	323.82	298.87	282.87	212.68	238.28	227.23	266.64	275.48	272.45	269.29	262.8	294.18	221.57	274.83	227.23	202.97	226.74	233	315.4	240.99	283.82	271.43	288.4	239.51	278.66	288.07	278.65	252.16	277.47	263.66	288.18	265.73	221.84
Cenpx	Acute	down-regulated	0.0379785	147.89	137.17	109.68	123.08	123.78	139.3	131.07	126.91	113.7	99.82	104.04	86.5	93.75	113.97	89.01	80.42	88.68	92.83	96.89	95.23	87.52	91.9	106.79	91.26	109.5	108.86	108.48	76.91	91.69	96.08	80.48	86.79	81.46	125.09	91.75	67.8	86.58	87.75	100.15	84.91	74.1	88.03	70.76	96.75	54.38	80.42
Cep68	Repeated	induced	0.0163615	35.21	31.84	39.49	34.62	26.83	28.85	27.22	35.8	31.84	26.83	29.91	29.61	28.32	23.52	30.92	25.65	30.28	38.68	36.87	40.81	22.87	30.09	26.93	28.59	20.44	26.97	24.91	24.47	31.16	26.9	24.01	16.93	29.42	24.18	22.94	37.24	37.11	38.57	32.01	21.53	17.7	14.49	27.14	27.79	40.79	45.75
Chmp1b	Challenge	induced	2.64847e-06	144.37	169.01	191.95	173.08	231.12	231.83	218.79	241.89	175.1	280.73	275.71	246.25	219.73	179.1	222.05	185.11	201.86	182.57	234.94	272.99	281.44	273.27	273	270.49	362.8	343.92	335.1	223.73	243.93	234.43	303.1	168.28	208.18	162.93	211.22	296.99	220.4	274.81	226.12	312.14	259.9	316.47	262.69	183.2	210.11	273.14
Ciart	Acute	induced	0.0476899	50.47	90.63	41.68	87.5	96.08	169.15	111.91	144.27	76.18	42.42	65.03	45.98	55.67	94.07	50.59	88.74	38.93	58.02	49.73	50.79	77.57	66.69	131.86	34.09	70.81	65.51	77.14	29.13	87.24	34.59	94.11	70.91	164.05	105.12	110.87	132.74	127.06	109.92	202.37	118.4	88.48	88.03	85.3	74.1	72.92	102.6
Cited2	Acute	induced	0.0197512	193.67	166.56	178.79	166.35	234.58	198	225.84	234.3	176.24	194.02	165.17	158.19	172.86	167.34	129.29	185.81	273.96	239.05	200.65	262.1	290.39	282.21	337.08	225.41	250.38	305.38	265.99	209.75	237.69	262.87	301.8	297.4	315.66	253.33	246.58	291.26	273.25	281.56	368.6	306.16	285.34	267.44	253	245.98	274.38	166.38
Clvs1	Acute	induced	7.6401e-06	443.68	494.79	479.32	478.85	397.31	435.8	372.04	458.84	493.46	541.5	543.62	525.24	579.12	564.43	574.33	655.87	550.07	468.81	459.6	490.65	523.11	487.98	467.08	497	529.96	613.66	523.14	569.82	598.24	574.93	610.73	485.79	556.64	411.01	472.14	450.74	327.22	450.3	347.95	539.36	440.18	411.19	466.26	484.75	537.64	571.23
Cnst	Acute, Repeated	induced	1.22524e-05	362.69	369.87	444.22	472.12	527.16	493.51	517.22	493.55	495.74	456.04	513.7	437.96	437.51	426.94	400.06	399.35	273.96	318.73	275.24	338.28	311.28	328.57	336.15	345.26	332.87	377.64	330.28	307.63	302.68	348.95	316.08	309.05	293.03	243.87	320.18	395.36	327.22	374.12	334.53	338.45	345.06	402.28	340.24	355.08	321.35	281.46
Coq10b	Acute	induced	0.000616769	77.47	112.67	80.07	118.27	153.21	225.86	154.26	225.62	104.61	155.34	122.25	147.28	83.99	126.63	82.45	151.14	102.37	118.36	101.18	131.5	181	166.73	156.93	112.16	189.06	157.03	166.34	142.16	125.52	96.08	184.32	109.01	199.12	120.88	127.12	169.03	218.15	170.67	198.24	217.66	203.5	169.38	139.59	144.09	140.9	142.81
Crem	Acute	induced	0.00316056	95.07	68.58	96.52	84.62	126.38	106.46	105.86	110.64	95.51	168.44	124.85	148.84	110.35	127.54	149.91	133.12	134.81	102.89	127.76	157.81	128.29	130.94	123.5	186.93	149.64	186.89	126.97	160.81	175.38	156.03	227.81	82.55	98.43	51.51	90.8	134.65	129.31	91.6	79.5	89.69	121.66	156.01	121.17	84.39	101.35	127.56
Cwc25	Challenge	induced	7.7421e-05	42.26	56.34	49.36	56.73	68.38	79.6	89.73	61.83	48.89	60.51	54.62	62.34	63.48	55.18	55.28	49.92	43.26	48.74	35.16	77.09	63.65	79.7	89.14	58.28	45.99	52.98	51.43	43.12	35.61	54.57	48.68	40.22	44.12	45.2	66.9	70.67	59.6	49.18	77.44	41.86	63.04	60.17	50.41	49.4	60.56	67.94
Cxadr	Repeated	induced	0.00111107	71.6	46.54	68	76.92	80.5	80.59	83.68	81.35	71.63	68.62	42.92	70.14	69.34	57.89	48.72	67.25	56.95	64.21	59.16	68.93	83.54	61	103.07	68.17	56.21	49.13	50.63	52.44	55.19	50.73	63.6	67.74	55.44	62.02	59.26	73.53	96.7	69.42	107.38	66.97	58.62	56.83	43.62	46.31	55.62	58.23
Cyp51	Challenge	induced	0.000412876	164.33	173.91	188.66	174.04	238.91	180.09	189.55	231.05	166	211.49	183.37	197.16	165.04	151.96	160.21	178.18	164.37	133.06	147.48	215.85	197.91	204.95	202.43	190.22	179.57	171.48	172.77	144.49	145.11	161.41	149.93	138.65	174.23	185.01	165.35	211.05	128.19	146.56	180.69	169.82	175.85	147.09	166.73	166.73	134.72	155.29
Dagla	Acute	induced	0.00487222	489.45	467.84	507.84	524.05	611.99	589.03	607.97	572.73	649.23	719.93	621.65	606.28	615.25	616.89	614.61	699.55	308.56	318.73	354.13	319.24	355.04	326.13	349.15	340.87	364.99	379.56	357.6	286.66	362.33	325.89	370.59	313.28	395.99	347.94	324.96	404.9	362.08	440.66	368.6	351.6	368.29	422.33	358.66	365.37	346.07	338.3
Ddit4	Repeated	induced	9.65755e-08	347.43	374.77	276.4	233.66	343.65	417.89	389.18	321.08	280.84	245.8	239.3	265.74	327.16	409.75	322.3	294.66	161.49	194.95	210.93	265.73	219.79	218.78	247.93	195.72	200.01	215.79	190.45	164.3	217.22	184.47	161.61	171.46	221.75	237.56	198.8	200.54	240.64	285.41	258.13	153.08	183.59	159.35	203.56	224.37	245.96	317.51
Ddx50	Acute	induced	0.00623513	145.55	139.62	175.49	152.89	174.85	161.19	170.39	188.74	186.47	225.21	215.89	215.08	160.16	181.81	177.08	214.93	274.68	231.31	264.1	229.45	320.23	274.89	262.79	247.4	253.3	254.33	254.74	261.02	242.14	232.89	263.5	213.79	209.31	218.64	150.05	213.91	217.02	223.7	234.38	246.36	233.36	264.1	220.04	208.93	184.16	158.06
Dlg2	Acute	induced	0.000168891	481.24	315.98	461.77	442.32	454.44	431.82	493.03	420.87	530.98	622.61	569.63	554.07	565.44	608.75	604.31	670.43	749.77	567.84	632.8	610.36	579.8	609.97	628.65	606.96	689.83	650.27	579.39	636.24	650.76	703.29	1002.75	552.47	704.86	563.43	679.54	655.11	652.19	686.54	547.23	700.81	618.24	725.43	760.94	659.72	642.7	829.12
Dnajb1	Acute, Challenge	induced	1.74885e-15	312.22	235.15	315.89	246.16	562.65	452.72	453.71	427.38	291.07	326.9	377.15	325.74	269.54	323.82	258.59	246.82	307.84	233.63	241.8	360.05	367.97	335.08	256.29	413.44	384.7	444.11	323.04	291.32	234.13	245.19	284.27	221.2	226.28	218.64	206.44	285.53	232.76	268.06	215.79	296.59	264.33	280.81	287.9	204.81	232.36	199.65
Dnajb5	Acute, Repeated, Challenge	induced	1.52162e-16	170.19	186.16	189.75	177.89	398.18	374.12	382.12	417.62	220.58	434.2	395.36	391.2	197.27	229.75	238.91	199.67	320.1	189.54	332.69	407.21	463.44	412.34	455.01	355.16	469.37	440.25	440.37	326.28	254.61	335.12	368	183.1	203.65	149.27	186.37	300.81	237.26	413.66	283.94	257.12	288.66	396.7	336.37	245.98	200.23	206.59
Dot1l	Acute	induced	0.00126821	188.97	191.06	193.04	200	212.07	199.99	247.02	223.45	222.85	281.98	258.8	256.38	253.91	223.42	290.44	259.99	131.21	136.16	121.76	139.67	209.84	184.62	182.93	208.92	218.26	166.66	137.41	187.61	188.73	179.86	180.43	197.92	164.05	204.98	180.64	192.9	240.64	207.31	178.62	197.33	189.12	215.07	227.8	219.22	211.35	219.07
Dusp1	Acute, Repeated, Challenge	induced	2.03992e-87	110.33	154.32	115.17	95.19	233.71	261.68	266.17	309.15	72.77	110.42	74.13	103.64	73.24	88.64	94.63	61.7	125.44	112.18	186.07	291.12	303.32	275.71	494.94	112.16	121.18	157.99	130.18	136.34	111.28	108.38	114.23	109.01	126.72	87.25	86.02	327.55	434.04	310.48	310.78	105.24	126.08	139.29	116.32	110.12	121.12	91.51
Dusp14	Acute, Repeated, Challenge	induced	1.05433e-20	301.65	289.03	366.35	344.24	979	673.61	744.08	861.27	419.56	1139.16	828.43	824.48	469.74	404.33	515.3	473.53	727.42	405.38	759.71	1015.76	999.48	1152.44	1060.45	999.51	1173.8	1371.82	1031.81	976.5	667.68	821.65	716.53	259.3	376.75	322.71	351.72	703.81	609.46	853.35	606.08	838.34	841.64	913.76	775.48	448.73	378.2	407.63
Dusp5	Acute, Repeated, Challenge	induced	9.48966e-36	22.3	19.6	24.13	18.27	50.21	61.69	43.35	58.58	26.15	21.83	27.31	20.26	22.46	32.56	22.49	17.33	28.12	37.13	28.3	55.32	60.66	69.13	88.22	31.89	29.2	39.5	22.5	23.31	19.59	21.52	20.12	16.93	28.28	31.54	20.07	67.8	66.34	62.68	93.96	23.92	42.03	24.52	27.14	21.61	28.43	20.8
Dusp6	Acute, Repeated, Challenge	induced	7.70422e-14	99.77	156.76	128.33	88.46	205.15	268.65	214.75	264.67	100.06	169.06	139.16	175.34	129.89	127.54	102.12	101.92	193.21	137.7	162.06	306.54	318.24	273.27	233.08	162.74	157.67	190.74	192.06	202.76	139.77	166.79	125.91	91.02	182.15	137.7	114.69	252.11	227.14	238.17	177.59	208.09	164.79	171.61	132.8	110.12	128.54	91.51
Ece1	Acute	induced	0.0181539	123.24	171.46	152.46	164.43	207.75	174.12	174.42	202.84	195.57	269.5	221.09	221.32	221.69	175.48	199.56	201.75	166.54	136.16	137.19	169.6	198.9	133.38	149.5	179.23	175.92	156.06	144.65	125.85	147.78	98.38	161.61	154.52	145.95	112.47	142.41	188.13	157.43	170.67	139.39	141.12	176.96	191.67	167.7	160.56	134.72	171.92
Efna1	Repeated	down-regulated	0.0243005	11.74	7.35	4.39	5.77	14.72	10.94	19.16	10.85	11.37	16.84	15.61	17.92	17.58	12.66	12.18	12.48	11.53	18.57	18.01	12.7	11.93	7.32	6.5	9.9	25.55	11.56	14.46	12.82	14.24	11.53	10.38	13.76	16.97	16.82	19.12	6.68	3.37	8.68	4.13	8.37	14.38	10.03	10.66	13.38	13.6	6.93
Egr1	Acute, Repeated, Challenge	induced	3.45576e-30	920.22	1254.12	1439.06	1095.21	3245.17	3165.06	3045.88	3462.44	1313.25	2406.2	2004.1	2127.44	1330.11	1222.93	1089.63	987.28	1761.97	891.21	1633.46	2825.99	2682.17	2522.03	2466.33	2112.27	2333.73	2637.67	2115.05	1591.76	1232.09	1428.86	1212.38	818.12	1276.21	784.17	972.96	1944.31	1423.58	2476.16	1836.82	1604.93	1931.03	2108.33	1848.56	1006.56	1022.14	776.43
Egr2	Acute, Repeated, Challenge	induced	1.995e-66	24.65	80.83	77.88	63.46	631.03	523.36	615.02	690.97	52.3	139.12	139.16	109.1	71.29	103.12	36.54	52	113.91	49.51	126.05	404.49	463.44	348.9	493.08	136.35	223.37	205.19	172.77	101.38	78.34	85.32	53.87	30.69	41.86	28.38	38.23	239.7	176.54	323.98	304.59	78.93	106.17	103.63	107.6	38.08	48.2	37.44
Egr3	Acute, Challenge	induced	1.41687e-14	854.49	800.97	829.21	698.09	1441.24	1272.59	1372.21	1391.7	839.11	1552.15	1431.87	1415.18	1368.2	1506.95	1624.6	1686.83	1092.94	949.23	1094.97	1161.77	1303.79	1127.23	1209.95	1331.57	1667.99	1624.22	1466.55	1351.72	1356.72	1406.57	1966.55	807.54	744.45	695.87	861.13	975.97	810.74	1019.2	832.2	984.25	915.75	931.59	1024.61	676.19	893.6	976.09
Egr4	Acute, Repeated, Challenge	induced	3.14675e-77	183.11	271.89	250.08	208.66	1348.62	1106.43	1188.71	1298.41	266.06	644.44	561.82	617.19	268.56	261.41	209.87	211.46	308.56	174.84	310.4	1139.1	980.58	901.13	1148.66	620.16	890.57	749.49	647.69	348.42	295.56	266.71	328.41	156.64	218.36	137.7	200.71	674.2	545.37	908.31	747.53	491.53	541.93	588.37	523.45	268.62	192.81	173.31
Epm2a	Repeated	induced	0.00151498	98.6	75.93	75.68	74.04	82.23	95.52	78.64	87.86	76.18	59.27	54.62	52.99	74.22	72.36	60.9	88.05	98.77	112.18	95.18	114.27	97.46	115.49	95.64	101.16	136.51	101.15	122.15	68.75	111.28	81.47	90.21	137.59	101.83	118.78	107.04	136.56	163.05	136.92	151.78	113.61	118.34	102.52	108.57	122.48	96.41	112.31
Eprs	Challenge	induced	0.000852265	118.55	169.01	150.27	162.5	199.96	154.22	157.28	181.15	152.36	207.12	189.88	198.72	168.95	184.52	194.88	162.93	209.07	190.31	204.93	249.41	303.32	259.44	266.5	248.5	266.44	263	275.63	252.86	295.56	256.72	338.14	200.03	240.99	218.64	228.43	264.53	258.63	293.13	272.58	294.2	276.49	251.84	236.52	240.83	220	239.86
Erf	Acute	induced	0.00280848	244.14	296.38	298.34	287.5	374.81	345.26	404.3	405.69	296.76	263.27	351.14	282.88	341.81	365.43	323.23	275.25	181.68	194.18	206.65	223.1	219.79	229.35	225.65	204.52	191.98	177.26	238.67	213.25	212.77	227.51	203.79	185.22	218.36	199.72	205.49	214.87	214.77	241.06	217.86	194.94	171.43	226.21	177.39	203.78	220	239.86
Fam110a	Repeated	down-regulated	0.0301569	31.69	19.6	32.91	28.85	24.24	19.9	28.23	15.19	26.15	24.33	16.91	21.04	21.48	29.85	24.36	26.35	25.95	21.66	20.58	23.58	13.92	21.96	13	14.29	21.17	19.27	22.5	13.98	24.04	13.07	16.23	30.69	23.76	29.43	17.2	9.55	13.49	12.54	15.49	17.94	12.17	10.03	10.66	6.18	23.48	15.25
Fam212b	Challenge	induced	0.00679896	430.77	431.1	519.9	500.97	566.11	645.75	548.48	570.56	569.64	567.08	594.34	586.02	626.97	529.15	564.96	483.24	379.21	333.43	345.56	441.67	474.38	398.51	420.65	440.93	408.06	389.2	400.19	377.55	375.68	361.25	340.09	324.92	372.23	305.89	353.63	394.4	353.08	356.77	340.73	380.3	411.42	459.11	354.78	347.87	389.33	399.31
Fbxo32	Repeated	down-regulated	0.0425461	151.41	144.52	125.04	159.62	139.36	116.41	159.3	137.76	135.3	131.01	135.25	136.37	163.09	151.06	148.97	185.11	138.42	196.5	166.35	140.57	155.14	161.85	173.65	168.23	174.46	153.17	165.54	159.64	194.07	179.09	215.48	245.54	188.94	195.52	202.62	226.33	199.03	166.81	171.4	148.29	161.47	164.92	145.4	174.96	227.42	189.95
Fos	Acute, Repeated, Challenge	induced	7.10412e-33	65.73	41.64	16.45	18.27	125.51	122.38	144.18	197.42	13.64	20.59	23.41	26.5	18.56	14.47	14.05	7.63	31	23.98	96.04	200.43	155.14	201.7	382.58	43.98	39.42	73.22	41.79	61.76	7.12	43.04	26.61	8.47	23.76	18.92	33.45	153.75	190.04	208.27	165.2	14.35	44.24	35.66	34.9	21.61	32.14	6.93
Fosb	Acute, Repeated, Challenge	induced	4.97547e-22	90.38	93.08	49.36	50.96	386.93	256.71	290.37	397.01	78.45	268.26	224.99	228.33	102.54	116.68	155.53	146.29	66.33	44.1	60.88	252.13	202.88	214.71	265.58	179.23	406.6	227.35	190.45	121.19	110.39	141.43	213.53	30.69	28.28	17.87	23.89	87.86	59.6	136.92	143.52	88.5	96.22	56.83	95	47.34	42.02	42.98
Fosl2	Acute, Repeated, Challenge	induced	6.48135e-43	75.12	73.48	65.81	57.69	465.7	308.45	430.52	417.62	77.32	220.22	126.15	190.92	72.27	71.46	66.52	56.85	124.72	34.81	88.32	348.26	320.23	332.64	325.93	210.02	321.19	276.48	228.22	137.5	91.69	117.6	75.29	37.04	40.73	35.74	51.61	163.3	93.33	210.2	134.23	132.75	174.74	130.38	152.19	58.66	43.26	56.85
Frmd6	Acute, Repeated, Challenge	induced	1.3739e-24	39.91	39.19	44.97	56.73	96.08	93.53	93.77	108.47	39.8	38.06	40.32	34.29	25.39	46.13	32.79	31.2	63.44	41	61.74	87.97	122.32	77.26	86.36	58.28	62.05	47.2	58.66	54.77	28.49	43.81	28.56	41.28	35.07	27.33	33.45	75.44	71.97	117.64	73.31	51.42	72.99	53.49	48.47	33.96	32.14	44.37
Gadd45b	Acute, Challenge	induced	1.99857e-15	139.68	95.53	99.81	112.5	249.3	240.79	296.42	298.3	131.89	130.39	191.18	127.8	121.1	126.63	178.95	149.76	81.47	95.93	107.18	159.62	209.84	141.51	208.93	130.85	178.84	133.91	118.13	110.7	119.29	101.46	134.35	109.01	81.46	104.07	101.31	126.06	136.06	136.92	125.97	145.9	76.31	89.15	104.69	80.28	56.85	141.42
Gemin6	Challenge	down-regulated	0.022644	24.65	34.29	29.61	21.15	14.72	14.92	35.29	24.95	27.29	23.08	28.61	26.5	31.25	20.8	29.04	44.37	33.16	43.32	34.3	32.65	31.82	31.72	44.57	24.19	23.36	16.38	22.5	47.78	45.4	49.96	46.73	59.27	41.86	23.13	26.76	33.42	37.11	35.68	34.07	55.01	46.45	30.09	44.59	36.02	23.48	38.82
Gm13889	Acute, Repeated, Challenge	induced	6.39776e-33	240.62	215.55	218.27	222.12	682.97	540.28	566.63	647.58	206.94	379.93	413.56	351.46	204.11	217.09	256.71	212.15	238.63	211.2	270.1	531.46	494.27	469.27	632.37	382.65	530.69	386.31	460.46	255.19	229.68	265.17	224.56	152.41	168.58	221.8	238.94	246.38	236.14	392.44	343.82	243.97	243.31	270.78	259.79	177.02	138.43	126.17
Gnai3	Acute	down-regulated	0.000231276	127.94	83.28	88.84	104.81	115.13	115.42	118.97	124.74	50.03	79.23	92.34	88.06	78.13	72.36	66.52	85.97	108.14	102.89	113.18	124.25	151.16	130.13	113.29	98.96	108.77	102.12	107.68	100.21	94.37	96.08	132.4	92.08	92.77	125.09	130.94	113.64	132.69	118.6	145.58	83.71	81.84	103.63	114.38	108.07	98.88	97.05
Gpr19	Repeated, Challenge	induced	1.75702e-09	75.12	88.18	54.84	85.58	100.41	80.59	79.65	84.61	56.85	64.88	57.22	63.12	62.5	79.6	59.96	51.31	52.63	57.25	67.74	100.67	99.45	93.53	83.57	71.47	67.16	70.32	60.27	55.93	59.65	66.1	57.11	71.97	63.36	69.38	74.55	99.32	105.7	93.53	104.28	56.21	63.04	65.75	63.98	82.34	70.45	67.94
Gpr3	Acute, Repeated, Challenge	induced	6.9954e-17	24.65	31.84	36.2	16.35	80.5	48.75	60.49	79.18	15.92	39.3	23.41	37.41	26.37	23.52	29.04	17.33	15.14	15.47	21.44	32.65	41.77	56.12	41.79	37.39	29.2	32.75	20.09	31.46	16.91	16.91	24.66	10.58	12.45	8.41	9.56	29.6	29.24	52.07	38.2	15.55	14.38	21.17	13.57	8.23	29.66	9.71
Gramd1b	Acute	induced	0.0142275	392.03	406.61	422.28	500.97	479.55	478.59	421.44	455.58	501.42	575.82	541.01	557.19	511.73	494.78	556.52	547.72	467.89	392.23	443.31	490.65	487.31	422.1	416.01	503.6	518.28	472.04	531.17	469.61	524.35	554.94	510.78	325.98	457.08	409.96	453.98	355.25	391.31	473.44	429.52	462.82	446.81	454.65	488.55	425.06	454.83	402.08
Grasp	Challenge	induced	1.21462e-05	295.79	323.33	329.05	252.89	399.91	330.34	384.14	375.31	263.79	468.51	525.41	413.8	401.38	411.56	422.55	356.36	277.56	276.18	285.53	363.68	331.17	320.44	349.15	402.44	476.67	444.11	431.53	336.76	312.47	378.16	364.1	257.18	194.6	230.21	246.58	260.71	237.26	314.34	254	310.94	273.18	374.42	334.43	229.51	344.83	284.23
Hbegf	Acute, Challenge	induced	6.98656e-09	203.06	93.08	154.65	145.19	255.35	260.69	256.09	308.06	143.26	245.8	169.07	204.95	171.88	183.62	167.71	164.32	191.05	140.03	206.65	254.85	322.22	277.33	260	238.61	278.85	305.38	253.13	230.72	225.23	215.98	155.77	141.82	155	120.88	160.57	235.88	199.03	219.85	147.65	139.92	218.98	225.1	199.69	144.09	142.14	162.22
Hes5	Challenge	induced	4.8882e-06	169.02	161.66	165.62	144.23	189.57	130.34	158.29	132.34	186.47	150.97	198.98	149.62	125	140.2	143.35	104.69	141.3	127.65	111.47	159.62	110.39	155.34	176.43	177.03	209.5	191.71	214.56	120.02	151.34	151.42	144.73	132.3	126.72	120.88	163.43	146.11	85.46	133.06	136.29	112.42	254.37	205.04	188.05	171.88	122.36	98.44
Hif3a	Repeated	induced	0.0232601	15.26	36.74	13.16	12.5	9.52	8.95	3.02	15.19	19.33	7.49	16.91	21.04	26.37	12.66	9.37	8.32	5.77	6.19	2.57	3.63	14.92	8.13	9.29	14.29	11.68	8.67	11.25	3.5	4.45	11.53	4.54	8.47	3.39	10.51	7.65	4.77	11.24	8.68	15.49	3.59	22.12	8.91	12.6	18.53	24.72	31.89
Hivep2	Acute	induced	1.3701e-07	850.97	889.15	946.58	903.86	909.76	860.66	943.71	852.59	981.24	1276.4	1023.51	1170.48	1199.25	1154.18	1285.44	1220.23	1203.24	988.69	1044.38	1036.62	993.51	1036.95	1060.45	1130.35	1107.37	1224.43	1038.24	1159.45	1144.85	1298.2	1101.4	952.54	956.02	900.85	1065.67	1085.79	859.09	1020.16	807.42	937.61	952.24	1008.47	1000.37	842.92	1108.66	1184.06
Hmg20a	Repeated	down-regulated	0.00142551	194.84	266.99	197.43	230.77	178.32	224.87	197.61	199.59	236.5	234.57	218.49	233.01	206.06	195.38	215.49	239.89	222.05	234.41	221.22	232.17	199.9	213.08	247.93	230.91	205.85	191.71	222.59	252.86	237.69	203.68	207.69	239.19	278.32	252.28	244.67	222.51	200.16	211.17	235.41	162.65	165.9	188.32	174.48	177.02	213.82	183.02
Hmgcr	Acute, Repeated, Challenge	induced	3.66408e-10	179.58	164.11	183.17	173.08	277.86	222.88	198.62	278.77	189.88	250.17	201.58	258.72	133.79	165.53	178.95	176.79	311.44	222.03	233.23	324.68	325.2	344.02	364.01	285.89	392.73	347.77	339.12	240.05	276.86	243.65	255.07	260.36	217.23	210.23	259.01	306.54	294.61	328.8	308.72	285.83	337.32	285.27	279.17	259.36	181.69	289.78
Homer1	Acute, Challenge	induced	0.000735558	1199.57	1143.89	1395.18	1286.56	1938.1	1657.65	1747.27	1919.96	1202.96	2209.07	2028.81	2054.19	1768.6	1751.17	2057.45	2129.86	1965.27	1619.96	1980.73	2066.89	2436.53	2027.55	1999.25	2578.48	2670.25	2523.03	2140.77	2599.73	2250.52	2238.99	2892.06	1801.35	1520.59	1217.25	1529.21	2059.86	1592.25	2078.89	1496.09	1903.91	1822.64	1984.63	1955.18	1338.99	1836.64	2003.48
Hook3	Repeated	induced	0.0320685	99.77	137.17	133.81	125.96	115.13	109.45	117.96	134.51	147.81	144.73	158.66	148.06	120.12	138.39	142.41	144.9	229.98	193.41	205.79	189.55	247.63	234.23	194.07	222.11	217.53	213.87	175.18	196.93	233.24	219.06	205.09	197.92	165.18	185.01	155.79	168.07	195.66	177.42	162.1	203.31	217.88	192.78	238.46	188.34	248.43	255.11
Hs3st5	Acute, Challenge	induced	0.00496711	41.08	44.09	52.65	55.77	37.22	41.79	52.43	50.98	51.17	54.9	39.02	56.11	74.22	52.46	73.08	75.57	73.54	51.06	63.45	55.32	62.65	71.57	49.22	50.58	55.48	63.58	57.05	95.55	73.89	93	137.59	53.98	71.28	50.46	76.46	92.63	42.73	66.53	41.3	88.5	81.84	44.57	56.22	57.64	63.03	58.23
Htr1b	Acute, Challenge	induced	0.000170221	278.18	293.93	344.41	335.58	421.55	427.84	378.09	383.99	338.83	504.7	474.69	453.54	404.31	410.66	381.32	420.84	405.89	324.92	287.25	424.44	416.7	413.15	368.65	528.89	519.01	527.92	462.87	489.41	365.89	470.39	548.43	373.61	386.94	351.09	357.45	367.66	266.5	559.26	370.67	483.15	432.44	432.36	590.34	414.77	421.46	346.62
Htr6	Challenge	induced	0.00228249	25.82	14.7	14.26	20.19	28.57	29.85	21.17	31.46	31.84	24.33	18.21	21.82	22.46	15.38	19.68	24.27	18.02	16.25	19.72	10.88	19.89	18.71	17.64	14.29	13.87	9.63	13.66	29.13	24.93	38.43	27.26	9.53	24.89	13.67	21.03	10.5	6.75	8.68	10.33	23.92	17.7	5.57	15.51	19.55	7.42	11.09
Ier5	Acute	induced	0.0292684	345.08	416.41	393.77	379.81	482.14	466.65	487.99	453.41	395.68	486.61	496.8	462.89	422.86	374.48	437.54	434.71	467.17	429.36	514.47	543.25	486.31	516.44	609.15	481.61	529.23	561.64	521.53	543.02	550.17	529.58	483.52	443.46	427.67	336.37	489.35	526.19	425.05	510.08	450.17	430.53	483.31	557.17	402.28	434.32	446.18	366.03
Igfbp2	Acute	down-regulated	6.98665e-06	874.44	85.73	37.29	34.62	38.09	44.77	39.32	31.46	43.21	36.81	45.52	31.95	42.97	29.85	33.73	20.8	28.84	34.04	14.58	27.21	30.83	34.16	37.14	39.58	29.2	37.57	29.73	22.14	33.83	33.82	25.96	17.99	21.5	29.43	33.45	50.61	19.12	22.18	30.98	27.51	21.01	25.63	34.9	32.93	21.01	40.21
Ina	Acute, Challenge	induced	1.20334e-08	597.44	602.56	594.49	557.7	855.22	720.37	877.16	865.61	567.37	976.95	880.45	846.3	922.88	859.3	1044.65	915.87	562.33	451.79	483.61	632.13	542	532.71	611.01	613.56	649.68	820.78	686.27	653.72	657.89	697.91	985.22	482.62	393.72	400.49	431.05	620.73	465.53	693.29	516.25	534.58	489.95	659.69	604.88	478.58	498.09	637.78
Inhba	Acute, Challenge	induced	1.60559e-17	84.51	75.93	94.33	78.85	95.22	107.46	86.71	98.71	98.92	218.97	200.28	168.33	130.86	150.15	182.7	178.87	142.02	154.72	149.2	131.5	171.05	194.38	195	273.79	371.56	351.62	238.67	262.19	218.11	295.15	356.96	161.93	133.5	106.17	123.29	121.28	130.44	148.49	129.06	168.63	189.12	198.35	159.94	122.48	134.72	180.24
Insr	Acute	induced	0.0165191	82.16	75.93	88.84	86.54	98.68	122.38	104.86	108.47	115.98	117.28	124.85	106.76	99.61	119.4	119.92	152.53	100.21	98.25	97.75	90.69	110.39	100.04	104.93	76.97	113.15	102.12	114.91	122.35	135.32	115.29	139.54	111.13	118.8	137.7	114.69	132.74	114.7	120.53	118.74	118.4	106.17	117.01	144.43	134.83	135.96	124.78
Irf2bp2	Acute	induced	0.000211185	170.19	176.36	141.49	136.54	183.51	191.04	196.61	227.79	142.13	173.43	171.67	165.99	128.91	144.72	108.68	123.41	222.77	196.5	206.65	237.62	211.83	236.67	195.93	159.44	191.98	216.76	203.31	187.61	170.93	202.92	142.14	157.7	210.44	174.49	194.97	212.96	214.77	236.24	212.7	156.67	199.08	210.61	224.89	218.19	210.11	177.47
Irf2bpl	Acute	induced	1.0953e-06	180.76	144.52	177.69	188.46	277	270.64	279.28	308.06	170.55	228.33	222.39	205.73	185.55	191.76	209.87	205.91	260.26	211.2	274.39	275.71	267.52	246.43	262.79	183.63	240.16	239.88	274.02	269.18	208.32	235.2	262.21	161.93	169.71	191.31	204.53	259.75	184.41	277.7	213.73	184.17	209.03	262.98	200.66	172.91	147.08	155.29
Irs2	Acute, Challenge	induced	3.9291e-14	259.4	205.75	223.76	214.43	504.65	411.93	422.45	493.55	212.62	483.49	370.65	459.78	204.11	216.18	226.73	253.75	281.89	199.59	286.39	449.84	493.27	358.66	434.58	438.73	573.03	477.82	435.55	241.21	234.13	257.49	269.35	131.24	221.75	192.36	206.44	226.33	209.15	402.09	330.4	276.26	263.22	333.19	397.43	197.61	207.64	177.47
Jag1	Acute	down-regulated	0.0225607	18.78	36.74	19.74	28.85	12.98	10.94	10.08	13.02	14.78	13.72	16.91	18.7	25.39	18.09	27.17	27.73	12.98	24.76	18.86	15.42	13.92	5.69	16.71	13.19	20.44	15.41	17.68	13.98	23.15	15.37	28.56	19.05	23.76	39.94	25.81	21.01	30.36	11.57	22.72	11.96	14.38	16.72	18.42	15.44	18.54	29.12
Jarid2	Repeated, Challenge	induced	3.66673e-13	73.95	110.23	102.01	94.23	91.75	98.5	95.78	81.35	84.14	164.07	135.25	144.17	104.49	105.83	97.44	113.01	106.7	112.18	106.32	136.04	145.2	154.53	104	200.12	214.61	148.36	188.04	115.36	130.87	114.52	112.28	102.66	97.3	104.07	115.65	109.82	118.07	112.82	110.48	187.76	164.79	148.21	153.16	135.85	87.75	91.51
Jcad	Challenge	down-regulated	0.00929111	456.59	455.6	556.1	560.59	573.03	559.18	564.61	572.73	529.85	567.71	547.52	586.8	693.38	575.28	590.25	691.93	593.33	635.14	695.4	506.07	554.93	535.15	541.37	495.9	513.9	571.27	605.1	591.96	647.2	657.17	624.36	566.23	665.26	491.95	566.76	676.11	613.96	645.07	567.88	623.08	682.38	670.83	537.99	569.15	542.59	647.49
Josd1	Challenge	induced	0.000448146	304	401.71	301.63	340.39	393.85	397	341.79	366.64	380.9	469.14	430.47	437.18	298.84	330.15	417.86	382.02	341.72	295.52	352.42	364.58	449.52	365.17	406.72	407.94	435.07	485.53	448.4	417.17	400.61	401.99	456.91	289.99	279.45	265.95	347.89	350.47	331.72	408.84	373.77	297.79	391.51	421.22	378.05	303.62	334.95	318.89
Jun	Acute, Challenge	induced	6.50847e-14	134.98	93.08	78.97	74.04	161.87	185.07	224.84	171.39	61.4	81.72	104.04	97.41	102.54	66.03	75.89	66.56	112.47	83.55	86.6	155.08	179.01	145.58	180.15	94.56	148.18	117.53	109.29	100.21	65.88	89.93	109.04	45.51	57.7	92.5	78.37	65.89	93.33	133.06	132.16	68.17	85.16	84.69	74.64	90.57	74.16	77.64
Junb	Acute, Repeated, Challenge	induced	2.5666e-132	556.36	1021.42	657.01	614.43	2921.43	3127.25	2977.32	3914.77	410.46	654.42	496.8	661.61	477.55	601.51	400.06	447.88	650.28	606.52	912.34	3007.37	3019.31	2613.93	4337.43	832.37	797.13	979.73	875.11	816.86	527.02	720.2	504.94	424.41	517.05	387.88	559.12	2052.22	2015.05	2504.12	2725.8	448.47	738.79	738.81	602.94	450.79	547.53	397.92
Kalrn	Repeated	down-regulated	0.0171891	515.28	658.9	635.07	669.24	549.66	578.09	466.81	533.68	646.96	557.73	578.73	595.37	623.06	684.73	618.36	597.64	916.31	778.26	749.42	730.08	782.67	712.45	802.3	720.22	715.38	736	796.36	863.47	746.02	760.16	640.59	892.21	863.25	914.52	862.09	622.64	629.7	781.03	696.94	761.8	814	746.61	831.7	782.19	980.12	708.5
Kazn	Acute, Repeated	induced	9.78537e-09	480.06	732.38	512.23	517.32	472.62	538.29	456.73	510.9	536.67	585.17	600.84	517.44	661.15	698.3	702.68	716.89	607.75	605.75	558.21	569.55	469.41	449.75	584.08	534.39	579.6	565.49	545.64	595.45	628.51	694.83	787.27	622.32	736.54	753.69	718.73	521.41	565.61	604.58	576.14	586	617.13	673.06	685.33	622.67	724.27	623.92
Kcnj2	Repeated	induced	0.000806624	133.81	173.91	206.21	181.73	232.85	259.69	224.84	245.15	167.14	213.98	167.77	199.5	178.72	203.52	127.42	189.97	262.42	256.07	352.42	282.05	319.24	291.16	273	302.38	209.5	346.81	270.81	276.17	283.1	255.95	245.98	243.43	293.03	277.51	190.2	351.43	282.24	314.34	314.91	212.87	257.69	239.58	241.37	200.69	205.17	210.75
Kcnn3	Acute	induced	2.34895e-05	149.07	112.67	120.65	95.19	122.92	117.41	128.05	119.32	147.81	198.39	157.36	205.73	125	133.87	148.97	140.05	251.61	185.67	222.08	193.18	193.93	237.48	158.79	269.39	262.06	350.66	264.38	231.89	204.75	221.36	268.7	155.58	164.05	180.8	250.41	130.83	154.05	202.49	154.88	203.31	215.66	217.3	307.28	217.16	133.48	167.77
Kctd1	Acute	induced	0.0432232	444.85	431.1	438.74	490.39	461.37	511.42	479.92	508.74	496.87	577.69	548.82	656.16	532.24	534.58	501.25	553.26	529.89	449.47	498.18	570.46	572.83	478.22	493.08	538.79	643.11	574.16	594.66	562.83	586.67	538.03	688.62	480.5	556.64	481.43	495.08	557.7	441.92	666.29	505.93	609.92	523.12	577.23	551.56	499.16	537.64	489.43
Kdm6b	Acute, Repeated, Challenge	induced	9.7686e-29	36.39	41.64	34	43.27	96.08	109.45	111.91	135.59	25.01	57.39	35.11	56.89	30.27	31.66	32.79	37.44	74.26	42.55	51.45	134.23	121.33	104.92	97.5	68.17	75.92	68.4	78.75	59.43	48.96	81.47	42.84	37.04	54.31	48.35	47.79	77.35	60.72	89.67	98.09	31.09	55.3	62.4	60.1	52.49	51.91	36.05
Kdm7a	Acute, Challenge	induced	5.77189e-09	187.8	195.96	250.08	226.93	324.6	311.43	293.4	336.26	243.32	326.9	347.24	300.02	249.03	246.94	239.85	258.61	478.7	413.11	533.34	532.37	693.17	627.05	539.51	663.04	697.86	636.78	609.12	555.84	548.39	519.59	473.14	341.85	320.18	338.48	375.61	360.98	446.41	487.9	373.77	435.32	435.75	476.94	481.77	377.72	402.92	411.79
Klf10	Challenge	induced	0.000668598	49.3	61.24	57.04	41.35	75.31	57.71	68.56	68.34	46.62	65.5	41.62	60	42.97	54.27	61.84	44.37	81.47	49.51	55.73	76.18	101.44	95.16	94.72	61.58	43.8	59.73	42.59	79.24	70.33	82.24	73.99	49.74	59.96	38.89	60.21	80.22	51.73	74.25	62.98	47.84	47.56	57.95	64.95	54.55	42.02	49.91
Klhl8	Repeated	induced	8.86666e-05	76.29	93.08	80.07	82.69	108.2	124.37	89.73	110.64	94.37	133.5	114.45	151.96	80.08	88.64	58.09	101.92	95.88	97.48	103.75	117.9	130.28	134.19	93.79	115.45	98.55	117.53	118.93	120.02	94.37	92.23	136.94	89.96	110.88	98.81	79.33	97.41	87.71	100.28	131.13	133.94	154.84	112.55	143.46	122.48	59.33	83.19
Lage3	Acute	down-regulated	0.0427816	83.34	68.58	68	77.89	83.1	82.58	104.86	68.34	59.12	41.17	46.82	52.99	57.62	79.6	73.08	56.85	71.37	72.72	83.17	69.83	90.5	84.58	80.79	65.97	86.87	68.4	60.27	88.56	83.68	83.78	72.04	67.74	92.77	81.99	87.93	82.13	97.83	85.82	82.6	90.89	82.95	70.2	55.25	88.51	75.39	105.37
Lrrk2	Acute	induced	6.72962e-06	274.66	360.07	420.09	365.39	412.03	365.16	354.9	333.01	455.94	688.73	475.99	568.88	425.79	454.07	480.63	574.06	489.52	432.45	425.3	441.67	468.41	497.74	442.01	547.58	542.37	531.77	474.12	453.29	488.74	534.19	458.86	538.71	476.32	399.44	447.29	529.05	476.77	554.44	423.33	519.03	531.97	571.65	526.36	484.75	423.94	571.23
Ly6c1	Acute	induced	0.0379785	280.53	406.61	427.77	354.81	322.01	351.23	328.68	356.87	450.26	439.82	577.43	381.07	508.8	531.86	500.31	567.82	319.37	396.09	324.12	290.22	422.66	358.66	411.36	434.33	312.43	316.94	317.42	368.23	354.31	363.56	318.02	301.64	276.06	512.97	392.81	320.87	247.38	318.2	335.56	301.37	232.25	236.24	321.83	342.72	431.35	267.59
Maml3	Acute, Challenge	induced	0.000116008	37.56	29.39	35.1	25	19.04	27.86	30.25	17.36	10.23	22.46	19.51	22.6	41.99	47.94	36.54	32.59	51.19	35.59	44.59	38.09	42.76	28.47	34.36	36.29	30.66	36.61	29.73	61.76	39.17	73.79	64.25	23.28	31.68	33.64	41.1	34.38	24.74	35.68	27.88	14.35	29.86	41.23	21.33	44.26	33.37	40.21
Map3k10	Acute	induced	0.034424	169.02	208.2	224.85	270.2	342.78	306.46	379.1	349.28	352.47	344.37	318.63	264.18	341.81	394.38	294.19	327.24	308.56	264.58	168.06	235.8	208.85	228.54	221	188.03	234.32	245.66	196.88	188.77	161.13	217.52	234.95	321.75	311.13	279.61	306.8	267.39	313.73	266.13	273.61	302.57	175.85	297.53	279.17	343.75	217.53	341.08
Mapk4	Acute	induced	0.000523289	152.59	195.96	171.11	200.96	164.47	168.15	192.57	173.56	169.41	255.78	218.49	208.07	240.24	253.27	277.33	307.83	226.37	219.71	194.64	194.08	197.91	191.12	187.57	163.84	248.92	184.96	231.43	184.11	255.5	269.79	239.49	260.36	216.1	295.38	266.66	231.1	215.9	219.85	264.32	240.38	256.59	262.98	303.41	242.89	239.78	244.02
Mas1	Acute, Repeated, Challenge	induced	1.8304e-08	25.82	34.29	26.32	31.73	19.91	22.88	23.19	20.61	29.56	25.58	20.81	26.5	31.25	38.89	47.78	48.53	18.74	37.91	27.44	35.37	23.87	28.47	28.79	29.69	24.09	28.9	18.48	53.6	43.62	49.19	42.84	31.75	30.55	27.33	24.85	37.24	34.86	21.21	36.14	29.9	33.18	13.37	15.51	24.7	44.49	67.94
Mchr1	Repeated	induced	0.00139621	251.18	367.42	295.05	292.31	326.33	335.31	368.01	310.23	256.96	239.56	309.52	243.14	307.63	319.3	297	279.41	214.84	223.58	258.09	225.82	257.58	234.23	289.72	222.11	235.78	182.07	218.58	248.2	186.95	235.2	212.23	185.22	176.5	209.18	224.6	240.65	260.88	269.99	194.11	200.92	179.17	168.26	168.67	179.08	226.18	250.95
Mcl1	Acute, Challenge	induced	1.44639e-05	309.87	169.01	180.98	193.27	302.1	226.86	264.16	247.32	167.14	180.29	179.47	174.56	171.88	180	143.35	171.94	151.4	140.03	126.9	178.66	236.69	191.12	195	166.03	164.97	203.27	153.49	172.46	160.24	139.89	178.48	127	139.16	142.96	167.26	158.52	138.31	222.74	214.76	137.53	168.11	183.87	166.73	155.41	170.56	141.42
Mest	Acute, Repeated, Challenge	induced	8.53326e-14	116.2	80.83	98.72	58.65	201.69	148.25	142.16	181.15	106.88	167.19	169.07	144.95	105.47	119.4	134.92	113.01	121.12	70.4	85.75	150.55	172.05	169.98	192.22	190.22	274.47	185.93	184.83	127.01	119.29	131.43	190.16	89.96	81.46	78.84	89.84	143.24	132.69	164.88	141.45	186.56	154.84	160.46	138.62	92.63	76.63	117.85
Midn	Acute, Repeated, Challenge	induced	1.79772e-21	130.29	124.92	119.56	79.81	323.74	318.4	305.5	382.91	97.78	180.29	189.88	183.13	149.42	135.68	111.49	95.68	157.16	81.23	105.47	309.26	270.5	221.22	247	201.22	205.85	205.19	191.25	160.81	126.41	156.8	96.06	56.09	121.06	83.04	99.4	152.79	161.92	210.2	179.66	159.06	151.52	180.52	178.36	86.45	114.94	91.51
Mknk2	Acute	induced	0.00429295	138.5	83.28	120.65	125.96	204.28	171.14	202.66	200.67	127.35	204.62	170.37	164.43	123.05	170.05	135.85	128.96	127.61	110.63	123.47	138.76	154.15	139.07	150.43	112.16	178.84	186.89	169.56	116.53	141.55	149.11	120.72	122.77	123.32	174.49	160.57	117.46	134.94	167.78	181.72	129.16	131.61	134.83	162.85	156.44	148.32	119.24
Mtcl1	Acute	induced	1.04178e-07	305.18	436	344.41	395.2	511.58	413.91	479.92	503.31	475.27	615.74	541.01	572.77	457.04	465.83	457.21	443.72	384.26	363.6	351.56	373.65	460.45	408.27	409.51	403.54	542.37	460.48	483.76	319.28	417.52	357.41	448.48	379.96	393.72	374.22	362.23	492.76	423.92	526.47	433.65	526.21	471.14	518.17	535.08	383.89	462.25	350.78
Mxd3	Repeated	induced	5.35008e-06	18.78	17.15	6.58	3.85	23.37	9.95	18.15	32.54	14.78	26.83	19.51	19.48	6.84	13.57	11.24	8.32	15.86	18.57	18.01	28.11	26.85	26.84	23.21	21.99	36.5	36.61	30.54	20.97	16.91	18.45	16.87	5.29	2.26	11.56	7.65	18.14	17.99	17.36	33.04	10.76	22.12	18.94	30.05	8.23	4.94	8.32
Nab2	Acute, Challenge	induced	8.7333e-18	218.32	227.8	214.98	205.77	365.29	415.9	355.91	356.87	176.24	239.56	224.99	196.38	230.47	212.56	238.91	194.82	196.82	216.61	210.08	287.5	281.44	253.75	356.58	223.21	203.66	229.28	214.56	241.21	182.5	218.29	223.27	191.57	218.36	193.41	256.14	266.43	214.77	260.34	246.77	129.16	224.51	227.32	189.99	219.22	196.52	159.45
Nbn	Acute, Challenge	induced	0.0012949	66.9	53.89	60.33	62.5	84.83	70.64	76.63	104.13	79.59	117.91	101.44	88.06	99.61	85.93	109.62	101.22	96.61	110.63	114.04	75.27	83.54	69.13	72.43	82.47	75.92	97.3	85.18	123.52	111.28	83.78	98.65	68.79	88.25	49.4	53.52	71.62	76.46	81	59.89	84.91	79.63	60.17	84.33	86.45	60.56	87.35
Nedd4l	Acute	induced	0.000685406	626.78	693.19	725.01	751.94	663.92	723.36	644.26	697.48	753.84	921.43	876.55	858.77	767.6	784.23	866.64	933.89	1019.4	952.33	992.08	899.67	988.54	899.5	940.66	1044.59	967.95	1071.25	1090.47	901.92	1066.51	1172.14	898.9	845.64	819.13	818.86	931.86	788.8	787.13	889.99	719.65	889.77	861.55	965.02	828.8	837.77	973.94	949.74
Nfkbia	Challenge	induced	0.00725723	152.59	169.01	109.68	128.85	138.5	182.08	145.19	156.2	72.77	117.91	163.87	123.91	106.45	193.57	103.06	149.76	134.09	148.54	135.48	221.29	180.01	165.91	149.5	147.34	105.85	103.08	132.59	131.68	122.85	134.51	113.58	137.59	126.72	169.24	125.2	155.66	205.78	196.7	157.97	135.14	123.87	131.49	148.31	198.64	205.17	196.88
Nop58	Acute, Challenge	induced	0.00727504	130.29	122.47	127.23	120.19	169.66	169.15	156.28	157.28	127.35	137.87	101.44	155.08	115.24	122.11	149.91	115.09	187.44	154.72	177.49	164.15	193.93	192.75	176.43	205.62	202.93	156.06	188.04	144.49	161.13	107.61	123.32	114.3	145.95	144.01	155.79	153.75	157.43	171.63	134.23	155.47	155.94	190.55	142.49	114.24	121.12	126.17
Npas4	Repeated	induced	0.000555562	138.5	120.02	32.91	50	108.2	51.74	88.72	151.86	30.7	45.54	44.22	45.2	69.34	47.94	40.29	27.73	36.77	26.3	45.45	66.21	44.75	82.14	111.43	62.68	31.39	83.81	36.16	66.42	35.61	84.55	35.05	25.4	24.89	24.18	74.55	72.58	98.95	69.42	125.97	21.53	46.45	43.46	41.68	27.79	30.9	38.82
Nptx2	Acute, Challenge	induced	2.72062e-05	92.73	85.73	132.72	79.81	190.43	164.17	137.12	189.83	123.93	242.68	189.88	201.06	142.58	133.87	177.08	144.21	175.19	93.61	151.77	220.38	221.77	198.44	183.86	279.29	317.54	264.92	223.4	220.24	186.06	224.44	221.32	89.96	69.01	91.45	114.69	89.77	73.09	149.46	136.29	157.86	158.15	163.81	181.27	94.69	108.76	160.83
Nr4a1	Acute, Repeated, Challenge	induced	5.54781e-43	265.27	411.51	512.23	286.54	1751.99	1606.91	1703.92	2075.08	254.69	685.62	319.93	621.09	348.64	407.94	237.98	259.3	648.84	360.51	813.73	1858.29	1821.93	1782.74	2287.11	838.97	582.52	1072.22	740.11	758.59	324.94	551.87	354.37	200.03	337.15	207.08	278.12	1537.49	1244.79	1644.02	1501.26	351.6	714.46	715.4	543.81	235.69	385.62	209.36
Nr4a3	Acute, Repeated, Challenge	induced	3.25318e-62	109.16	63.69	69.1	84.62	560.05	343.27	357.92	490.29	130.76	298.2	271.81	246.25	52.74	68.74	77.76	70.02	88.68	45.64	80.6	356.42	334.15	332.64	339.86	296.88	475.21	323.69	294.11	108.37	81.01	83.78	101.9	32.81	58.83	17.87	33.45	194.81	160.8	276.74	337.63	226.03	272.07	220.64	240.4	109.1	49.44	56.85
Ntrk2	Acute	down-regulated	8.16521e-05	1902.65	1356.99	1251.5	1205.79	1204.06	1133.29	1163.5	1185.6	1230.25	1553.4	1469.58	1455.7	1577.19	1619.11	1761.39	1784.59	1490.89	1423.46	1339.35	1553.57	1648.89	1391.55	1621.31	1522.9	1416.88	1567.38	1353.25	1596.42	1563.26	1734.77	1991.21	1171.62	1224.16	1488.45	1436.5	1167.92	1212.18	1420.32	1280.3	1194.73	1271.87	1274.8	1494.74	1240.19	1493.04	1375.4
Ntrk3	Acute	induced	0.0218781	813.41	852.41	900.51	960.59	887.25	915.39	882.21	863.44	869.81	1053.07	949.38	1019.3	1131.86	1016.69	1033.41	1152.29	991.29	972.44	1010.09	874.28	984.56	1026.38	942.52	1029.19	927.8	1087.63	926.54	991.65	1101.23	1055.31	1017.67	1082.72	1023.91	1067.99	1058.02	1143.09	998.53	1112.73	853.88	1057.2	1028.55	1043.02	978.08	990.09	1170.46	1148.01
Nus1	Acute	induced	0.00111107	356.82	433.55	397.06	416.35	473.49	496.5	397.24	462.09	457.08	573.95	521.51	545.5	488.29	489.35	471.27	606.65	580.35	575.57	551.35	524.2	529.08	537.59	569.22	600.36	587.63	651.23	621.98	596.62	590.23	563.4	711.33	643.49	715.04	604.42	602.12	553.88	581.35	654.72	625.7	675.7	696.76	687.55	623.29	716.33	601.91	654.42
Osbpl3	Acute	induced	3.4229e-05	79.82	58.79	76.78	93.27	79.64	91.54	60.49	101.96	118.25	132.88	120.95	131.7	100.59	71.46	115.24	115.78	108.86	78.91	82.32	131.5	128.29	145.58	104	112.16	154.02	128.13	150.27	127.01	144.22	110.68	110.98	110.07	105.22	66.22	128.07	106	93.33	134.03	96.02	149.49	182.49	147.09	142.49	130.71	122.36	152.51
P4ha1	Repeated	induced	0.0156628	255.88	178.81	242.4	200.96	294.31	257.7	269.2	282.03	234.22	255.16	284.81	250.93	257.82	216.18	231.42	213.54	364.07	222.8	308.68	284.78	341.11	302.55	310.15	349.66	302.94	448.92	312.6	349.58	271.52	307.45	281.03	212.73	282.85	259.64	237.98	334.24	283.37	341.34	283.94	339.64	310.78	354.36	337.33	266.56	275.62	259.27
Papola	Acute	induced	0.00814739	302.83	355.17	367.44	355.78	389.52	414.91	395.23	430.64	386.58	475.38	444.78	459	421.89	386.23	406.62	467.99	561.61	417.76	471.6	429.88	498.25	489.6	455.94	515.7	486.89	546.22	497.42	568.65	565.3	531.12	481.58	441.34	419.75	444.64	475.01	454.56	534.12	500.44	516.25	485.55	516.49	482.51	545.75	459.02	442.47	439.52
Paxbp1	Acute	induced	0.000367232	165.5	205.75	232.53	220.2	285.65	263.67	267.18	263.59	218.31	300.7	279.61	310.15	221.69	236.99	222.05	258.61	206.19	215.07	196.36	192.27	273.49	245.62	223.79	222.11	235.78	269.74	251.52	188.77	200.3	206.76	216.77	220.14	212.7	271.2	213.13	233.01	267.62	280.59	284.97	259.52	238.89	265.21	267.54	245.98	161.91	207.97
Pde8b	Acute	induced	0.00337802	301.65	418.86	326.86	309.62	324.6	303.47	340.78	303.72	392.27	379.93	377.15	371.72	361.34	445.93	403.81	435.4	496.72	447.93	481.89	453.46	422.66	390.38	481.01	481.61	454.77	519.25	536.8	446.3	480.73	518.82	571.14	488.97	491.02	456.21	521.84	438.33	439.67	517.79	474.95	464.02	462.3	500.34	493.4	459.02	493.15	515.77
Pdzd2	Acute	induced	7.50553e-09	213.62	259.64	198.53	175	143.69	171.14	126.03	152.95	145.54	205.87	183.37	186.25	251.96	269.55	318.55	404.2	204.02	314.86	204.08	174.13	191.94	178.11	233.08	248.5	255.49	212.9	247.51	230.72	270.63	280.55	327.11	265.65	280.58	357.4	275.26	163.3	174.29	244.92	177.59	197.33	213.45	218.41	235.55	195.55	229.89	187.18
Peli1	Acute, Repeated, Challenge	induced	4.02347e-20	126.77	156.76	168.91	161.54	249.3	231.83	238.95	301.55	216.03	293.21	280.91	275.09	181.65	165.53	179.89	151.14	367.68	276.96	316.4	480.67	463.44	501.8	403.94	440.93	551.86	568.38	419.47	336.76	380.13	378.16	311.53	196.86	325.84	244.92	247.54	266.43	308.1	421.37	365.51	461.63	400.36	429.02	374.17	305.67	258.32	207.97
Peli2	Acute	induced	0.000800956	131.46	132.27	114.07	141.35	130.71	120.39	108.89	106.3	119.39	141.61	152.16	151.18	145.51	173.67	148.03	197.59	132.65	132.29	126.9	126.97	97.46	99.22	119.79	127.55	152.56	177.26	119.74	121.19	131.76	145.27	151.22	137.59	141.42	136.65	166.3	107.91	137.19	102.21	122.87	144.71	129.4	140.41	149.28	131.74	145.84	144.19
Per1	Acute, Repeated, Challenge	induced	3.22985e-62	296.96	531.53	442.03	434.62	951.3	976.08	924.55	959.98	458.22	515.93	513.7	466.79	449.23	467.64	368.21	395.88	335.96	290.88	336.98	627.59	564.88	550.6	615.65	416.74	450.39	431.58	446.8	327.44	323.16	338.96	353.07	293.17	427.67	380.52	371.79	565.34	568.98	694.25	728.95	393.46	449.02	485.85	418.76	404.48	444.95	299.48
Per2	Challenge	induced	0.000182639	90.38	115.12	148.07	106.73	140.23	138.3	107.88	134.51	129.62	160.95	159.96	160.53	125.98	157.39	125.55	180.95	117.51	81.23	83.17	118.81	122.32	121.18	135.57	174.83	173.73	159.92	149.47	128.18	146.89	126.05	203.15	132.3	210.44	167.14	148.14	172.85	133.81	235.27	225.09	247.56	196.86	202.81	225.86	187.32	163.15	140.04
Pfkfb3	Challenge	induced	7.11237e-05	184.28	105.33	133.81	134.62	182.64	188.05	163.33	176.81	128.48	223.34	214.59	178.46	138.68	114.88	164.9	138.66	147.07	115.27	134.62	143.29	174.04	154.53	164.36	222.11	208.04	224.46	180	136.34	135.32	147.57	171.34	97.37	141.42	91.45	108.96	129.88	113.57	203.45	102.22	179.39	169.21	162.69	195.81	119.39	129.78	131.72
Phf23	Acute	induced	0.0409963	177.24	188.61	175.49	196.16	237.18	232.83	226.85	235.38	201.25	215.85	249.7	190.92	202.15	207.14	196.75	177.49	191.05	153.95	188.64	177.76	190.94	208.2	187.57	211.12	218.99	232.17	197.68	209.75	181.61	177.55	181.73	190.51	149.34	180.8	172.04	203.41	160.8	189.95	149.71	178.19	205.71	223.98	202.59	182.17	175.51	171.92
Phlda1	Acute, Repeated	induced	8.31236e-09	58.69	80.83	69.1	72.12	131.57	100.49	106.87	144.27	65.95	84.22	76.73	109.1	74.22	77.79	74.02	70.02	173.75	136.16	167.2	252.13	244.65	213.9	226.58	155.04	162.05	244.69	160.72	224.9	168.26	169.86	120.72	110.07	110.88	103.01	118.51	162.34	134.94	194.78	148.68	102.85	140.46	125.92	129.89	116.3	95.17	117.85
Pim1	Acute	induced	0.00566665	27	19.6	7.68	7.69	12.12	5.97	8.07	11.93	21.6	26.83	32.51	31.95	26.37	21.71	32.79	19.41	25.23	19.34	20.58	20.86	17.9	15.45	22.29	47.28	47.45	19.27	25.71	40.78	33.83	45.35	18.17	12.7	13.58	6.31	13.38	5.73	13.49	16.39	8.26	23.92	13.27	11.14	16.48	5.15	3.71	9.71
Pim3	Acute, Repeated	induced	3.77622e-08	124.42	122.47	139.3	105.77	198.22	157.21	173.42	213.69	114.84	142.24	150.86	148.06	166.02	136.58	150.84	147.68	102.37	152.4	153.48	207.69	216.8	167.54	241.43	137.45	146.72	160.88	174.38	122.35	146	175.25	170.69	169.34	162.92	167.14	144.32	169.98	232.76	220.81	229.22	138.73	142.67	149.32	158.97	146.15	198.99	176.08
Plekhf1	Challenge	induced	4.01755e-05	23.48	58.79	18.65	35.58	48.47	51.74	42.35	40.13	29.56	19.96	37.71	18.7	27.34	37.09	25.3	30.51	10.81	11.6	17.15	38.09	47.74	20.33	26.93	18.69	32.12	38.53	32.95	16.31	15.13	20.75	12.98	19.05	22.63	23.13	12.42	28.65	23.61	36.64	30.98	27.51	37.6	21.17	47.5	33.96	37.08	36.05
Plk2	Acute, Challenge	induced	1.31033e-11	590.4	827.91	682.24	724.05	836.18	936.28	973.96	1047.84	696.99	680	702.28	786.3	668.96	753.47	669.89	738.38	780.05	743.45	765.71	918.72	936.82	1036.14	1075.3	768.6	794.94	684.95	853.41	778.4	764.71	707.9	820.37	931.37	920.95	779.97	779.9	1060.01	1209.93	1097.3	1043.86	1032.08	968.83	858.04	690.18	825.42	946.75	937.27
Plk3	Challenge	induced	0.00015222	12.91	34.29	12.07	12.5	27.7	27.86	26.21	32.54	19.33	27.45	32.51	28.83	18.56	20.8	7.5	11.09	20.91	20.11	14.58	37.18	41.77	36.6	33.43	63.77	46.72	30.83	32.14	41.95	30.27	28.44	23.36	22.23	30.55	19.97	36.32	22.92	22.49	37.61	38.2	20.33	25.44	32.32	32.96	21.61	22.25	13.86
Plxna2	Acute	induced	2.33482e-07	198.36	183.71	242.4	220.2	171.39	202.98	193.58	177.89	236.5	303.19	234.09	258.72	253.91	280.4	308.24	353.59	268.19	275.41	237.52	244.87	219.79	223.66	230.29	271.59	216.8	254.33	265.19	278.5	306.24	318.21	321.92	257.18	214.96	251.23	225.56	220.6	178.79	231.42	265.35	215.27	217.88	229.55	302.44	243.92	237.3	227.38
Pmepa1	Repeated	induced	0.00118826	801.67	754.43	700.88	861.55	849.16	974.09	835.83	800.53	862.99	837.84	781.61	890.72	787.13	761.62	811.36	796.62	648.12	615.03	653.38	693.8	711.07	638.44	727.08	732.31	732.16	714.81	802.79	668.87	668.57	805.51	601.65	658.31	684.49	628.6	651.82	659.88	689.3	662.43	688.68	722.34	601.65	694.23	659.16	682.36	821.91	815.26
Pnma2	Challenge	down-regulated	0.00751531	134.98	161.66	172.2	206.73	164.47	177.11	153.25	156.2	161.46	155.34	170.37	175.34	130.86	143.82	148.03	139.36	221.33	207.33	221.22	196.8	214.81	222.03	215.43	230.91	200.74	175.33	216.17	173.63	152.23	167.56	135	209.56	170.84	172.39	205.49	202.45	161.92	202.49	183.79	196.13	200.18	172.72	191.93	150.26	184.16	152.51
Pnpla2	Repeated	down-regulated	0.00487222	91.55	66.14	95.43	70.19	76.17	82.58	70.58	95.46	110.29	93.58	66.33	70.14	119.14	104.93	90.88	106.77	54.79	68.08	58.31	68.93	60.66	64.25	53.86	63.77	70.08	72.25	61.88	54.77	57.87	69.94	61.01	73.03	85.99	115.63	76.46	60.16	64.09	59.78	50.59	57.4	55.3	88.03	61.07	62.78	82.81	99.83
Pnrc1	Acute	induced	0.00157867	221.84	208.2	172.2	193.27	222.46	261.68	251.05	248.4	177.37	158.46	195.08	184.69	195.32	172.77	153.65	159.46	327.3	321.83	306.97	272.99	303.32	294.41	337.08	244.1	308.78	382.45	293.31	290.15	259.95	298.22	294.01	284.7	342.81	262.79	308.71	311.32	284.49	364.48	295.3	266.69	324.05	288.61	327.64	294.35	233.6	239.86
Polr3e	Challenge	induced	3.89332e-06	127.94	188.61	149.17	194.23	190.43	206.96	173.42	199.59	210.35	136	149.56	154.3	149.42	197.19	148.97	149.76	81.47	123.78	105.47	146.02	144.2	129.31	138.36	162.74	161.32	142.58	159.91	83.9	114.84	96.85	99.95	174.63	182.15	160.83	146.23	186.22	236.14	184.17	268.45	173.41	194.65	182.75	174.48	268.62	218.77	271.75
Ppm1d	Acute, Repeated	induced	2.18897e-08	109.16	100.43	100.91	82.69	164.47	138.3	161.32	150.78	77.32	122.9	106.64	106.76	87.89	111.26	80.57	111.62	104.54	123.01	131.19	147.83	146.19	152.09	179.22	107.76	160.59	170.51	139.02	116.53	134.43	106.07	125.26	114.3	123.32	73.58	120.42	154.7	168.67	145.6	163.14	127.96	121.66	154.89	138.62	113.21	105.06	88.74
Ppp1r15a	Challenge	induced	6.59588e-07	102.12	100.43	54.84	68.27	81.37	91.54	90.74	106.3	50.03	70.5	61.12	49.09	71.29	47.94	64.65	47.84	60.56	66.53	66.02	92.51	87.52	90.28	132.79	50.58	51.1	63.58	90	50.11	53.41	55.34	65.55	57.15	45.26	57.81	64.04	71.62	89.96	99.32	73.31	55.01	42.03	66.86	94.03	65.87	34.61	55.46
Psd3	Acute	induced	0.0449521	793.46	803.42	807.28	876.94	849.16	882.55	869.1	786.42	901.65	980.07	942.87	970.99	983.42	1005.84	980.94	1074.64	1148.45	1151.15	1080.4	1040.25	975.61	1251.66	1144.02	1124.86	1009.56	1028.86	1031.81	1095.36	1182.24	1095.28	1155.92	1027.68	1040.88	1160.49	953.84	996.98	1133.46	1156.12	980.88	967.5	1149.11	1063.08	1096.34	1061.11	1048.1	1030.16
Ptpn5	Acute	induced	0.00361782	2015.33	2417.6	2492.03	2477.93	2637.51	2581	2673.84	2481.85	2454.81	3200.37	2708.98	3247.28	2982.5	2766.06	3043.08	3093.56	2960.16	3055.03	3128.86	3157.01	3136.66	3183.24	3240.77	3418.55	3141.81	3102.01	3173.38	3094.97	3345.52	3370.39	3782.53	3500.04	3429.24	3170.32	3270.59	4277.28	3600.54	3621.67	3224.5	3506.45	3648.6	4067.33	3511	3482.83	3761.03	3775.41
Pvr	Acute, Repeated, Challenge	induced	1.4947e-06	38.73	24.49	44.97	35.58	72.71	47.76	90.74	75.93	43.21	45.54	45.52	38.96	41.99	61.51	55.28	35.36	33.16	42.55	49.73	56.23	66.63	67.5	66.86	48.38	45.99	47.2	38.57	24.47	41.84	53.8	40.24	44.45	41.86	49.4	43.96	56.34	57.35	57.85	70.21	33.49	48.66	39	36.84	37.05	32.14	40.21
R3hdm1	Acute, Repeated, Challenge	induced	4.08414e-10	469.5	438.45	567.07	505.78	620.64	534.31	561.59	592.26	566.23	754.86	632.05	663.95	614.27	540.91	663.33	661.42	694.26	577.89	617.37	831.65	904	904.38	756.8	869.76	878.89	815	797.16	794.72	729.11	730.96	634.75	592.69	552.12	549.76	564.85	704.76	797.25	725.1	677.32	776.16	738.79	816.81	690.18	616.49	575.96	675.22
R3hdm2	Acute	induced	0.0388588	218.32	191.06	229.24	223.08	234.58	177.11	209.71	234.3	225.13	291.96	248.4	257.16	303.72	283.12	267.96	302.28	396.51	287.01	294.11	311.98	333.16	285.47	262.79	330.97	302.21	324.65	331.08	342.59	318.71	342.04	393.31	303.75	278.32	272.25	332.6	297.95	250.76	343.27	295.3	267.89	276.49	306.44	336.37	292.29	304.05	325.82
Rab34	Acute	down-regulated	0.00980434	124.42	139.62	102.01	102.89	77.9	70.64	89.73	92.2	103.47	82.97	79.33	78.71	80.08	87.74	104.93	89.44	82.19	85.1	78.89	81.62	82.54	93.53	79.86	67.07	63.51	50.09	70.72	73.41	112.17	83.01	73.99	68.79	74.67	80.94	97.49	89.77	101.2	85.82	106.35	84.91	105.07	110.32	100.81	84.39	91.46	123.4
Rem2	Challenge	induced	2.72062e-05	231.23	369.87	256.66	294.24	353.17	441.77	365.99	388.33	343.38	347.49	487.69	302.36	293.95	296.69	325.11	268.31	240.07	190.31	229.8	236.71	255.59	261.88	247.93	322.17	281.77	334.28	321.44	241.21	259.95	322.05	355.02	248.72	272.67	216.54	211.22	242.56	276.62	269.99	292.2	306.16	285.34	351.02	293.71	261.42	247.19	232.93
Rere	Acute	down-regulated	0.015002	233.58	271.89	233.63	218.27	209.48	199	194.59	174.64	235.36	264.51	230.19	244.7	215.83	238.8	214.55	232.26	221.33	205.01	174.06	195.9	175.03	195.19	185.72	214.42	238.7	184.96	229.02	205.09	227.9	220.59	223.91	213.79	212.7	282.76	241.81	219.64	187.79	217.92	225.09	224.83	241.1	202.81	284.99	292.29	284.27	235.7
Rgs2	Acute, Repeated, Challenge	induced	6.09017e-16	819.28	945.49	1171.43	1085.6	1630.81	1633.77	1574.86	1868.98	939.17	1321.95	961.08	1417.52	937.52	915.39	850.71	850	1617.78	1099.32	1595.73	2065.98	2055.64	2189.39	2025.25	1735.11	1411.77	1866.98	1717.27	1814.33	1430.61	1371.22	1198.1	938.78	1201.54	767.35	908.92	1716.07	1899.23	1767.44	1514.68	1365.75	1791.68	1691.56	1089.55	889.23	894.84	884.58
Rgs20	Acute	induced	1.06854e-07	314.57	306.18	344.41	306.74	336.72	278.6	277.26	305.89	328.6	426.09	394.06	450.43	420.91	409.75	464.71	465.21	451.31	393	431.3	367.31	393.82	386.32	385.36	440.93	398.57	456.63	415.46	466.11	448.68	480.39	488.72	376.78	358.65	315.35	436.78	362.89	349.71	365.45	305.62	336.05	305.25	396.7	372.23	292.29	412.81	327.21
Rhou	Challenge	induced	6.71725e-05	91.55	132.27	93.23	99.04	105.6	118.4	100.82	114.98	127.35	122.9	111.84	140.27	96.68	99.5	95.56	103.3	74.26	80.46	66.88	89.79	88.51	68.32	95.64	103.36	98.55	83.81	94.02	61.76	62.32	76.09	59.71	124.89	100.69	124.04	85.06	80.22	95.58	88.71	100.15	82.52	82.95	98.06	103.72	106.01	180.45	133.1
Rnd3	Acute, Repeated	induced	5.03117e-27	51.65	12.25	39.49	26.92	146.29	102.48	157.28	183.32	35.25	84.22	52.02	51.43	32.23	36.18	41.22	36.05	116.07	92.06	105.47	164.15	183.98	213.9	166.22	139.64	125.56	176.29	98.84	172.46	86.35	96.85	103.2	35.98	54.31	52.56	51.61	166.16	132.69	207.31	131.13	77.74	110.6	118.12	91.12	48.37	44.49	24.96
Rnf217	Challenge	induced	0.000520712	56.34	36.74	47.16	50.96	59.73	59.7	44.36	60.74	64.81	80.48	65.03	63.9	38.09	50.65	33.73	63.09	89.4	50.29	63.45	85.25	49.73	107.36	54.79	118.75	137.97	104.04	117.32	59.43	68.55	71.48	61.01	74.09	71.28	81.99	49.7	84.04	55.1	76.17	64.02	70.56	74.1	59.06	84.33	61.75	50.67	62.39
Rpl26	Acute	down-regulated	0.0181286	2744.23	2576.82	3011.93	2640.43	2654.82	3117.3	2863.39	3063.26	2364.98	1915.85	2617.94	2063.54	2376.04	2501.93	2327.28	2007.14	2395.67	2708.45	2497.78	2688.13	2579.74	2529.35	2701.26	2380.56	2183.36	2767.72	2510.42	3064.67	2470.41	2347.36	2286.52	2381.34	2155.3	1930.99	1802.55	2097.1	2452.46	2039.36	2087.72	2163.43	2481.8	2030.32	1863.1	1731.12	1899.67	1993.77
Rpl35	Acute	down-regulated	0.0181286	304	257.19	274.21	224.04	261.41	284.57	247.02	253.83	211.48	162.83	218.49	158.97	235.36	208.95	211.74	142.13	250.89	303.26	289.82	268.45	265.53	271.64	288.79	274.89	227.75	289.01	272.42	346.09	283.1	216.75	243.38	268.83	289.64	244.92	214.09	291.26	326.1	225.63	255.03	301.37	306.35	252.95	221.98	255.24	212.59	238.48
Rps14	Acute	down-regulated	0.0408404	4879.28	4982.17	5237.43	4717.39	4419.8	5303.29	4691.32	5203.42	4166.01	3343.23	4439.96	3456.9	4062.6	4227.78	3810.41	3297.4	6228.88	6859.7	6334.04	6856.37	6557.75	6401.45	6795.4	6321.4	5957.33	6816.71	6206.94	7721.1	6398.15	5654.73	5301.25	6262.4	5655.82	4938.38	4437.57	4948.62	6295.89	4899.28	5046.87	6136.29	6214.46	5456.91	4770.19	4417.34	4781.94	5404.53
Rsph9	Acute	down-regulated	0.0460445	105.64	83.28	48.26	49.04	38.95	60.69	60.49	61.83	32.97	28.7	49.42	24.16	39.06	43.42	36.54	29.81	54.79	50.29	42.87	51.69	39.78	50.42	58.5	46.18	71.54	43.35	45	66.42	48.07	62.26	43.48	33.87	35.07	36.79	42.05	20.05	43.85	29.89	49.56	34.68	32.07	26.74	48.47	38.08	28.43	34.66
Rsrp1	Acute	induced	0.000685406	1189.01	1349.64	1350.21	1359.64	1655.91	1647.7	1675.69	1724.71	1347.36	1727.45	1520.3	1662.21	1476.6	1451.77	1327.6	1614.73	1151.33	1226.96	1072.68	1197.14	1240.15	1293.14	1305.59	1230.41	1395.71	1352.55	1339.59	1086.04	1164.43	1158.31	1072.84	1529.35	1561.32	1743.89	1429.81	1610.07	1594.49	1538.92	1808.94	1540.35	1773.98	1626.93	1514.13	1718.77	1339.78	1332.42
Ryr3	Acute, Repeated	induced	4.32968e-05	353.3	347.82	416.8	394.24	407.7	412.92	439.59	404.6	476.41	476	477.29	451.21	540.05	559.9	472.2	529.69	387.86	382.94	379.85	307.45	432.61	418.85	420.65	422.23	416.82	367.04	374.47	356.57	524.35	443.49	351.12	457.22	423.14	510.87	390.9	548.15	484.65	451.26	432.62	438.9	447.92	413.42	369.32	443.59	592.03	689.08
Sbk1	Acute	induced	0.0270891	359.17	426.2	453	363.47	511.58	491.52	488.99	477.28	440.02	615.12	529.31	520.56	459.97	466.74	444.1	496.41	429.68	369.79	379.85	437.14	494.27	430.23	481.01	468.41	506.6	462.41	494.21	454.46	464.7	410.44	578.28	354.56	426.53	459.36	454.94	487.99	375.57	566.01	514.19	414.99	502.11	528.2	581.61	452.85	449.89	395.15
Sema4c	Acute	induced	0.00112557	36.39	36.74	30.71	46.15	71.85	48.75	72.59	94.37	36.38	56.15	63.73	60	57.62	59.7	61.84	56.16	48.3	47.19	53.16	63.48	66.63	46.36	65	46.18	39.42	28.9	42.59	37.29	41.84	48.42	37.64	52.92	39.6	42.05	51.61	42.97	29.24	49.18	40.27	28.7	26.54	33.43	35.87	48.37	48.2	34.66
Sertad1	Acute, Repeated, Challenge	induced	3.52904e-29	86.86	90.63	49.36	75	167.06	152.23	162.33	198.5	89.82	76.11	87.13	49.87	63.48	76.89	67.46	77.65	41.81	54.93	44.59	92.51	134.26	97.6	136.5	62.68	93.44	61.65	79.56	59.43	70.33	67.64	64.25	50.8	40.73	33.64	39.19	78.31	97.83	85.82	73.31	62.19	45.34	51.26	43.62	41.17	58.09	58.23
Sgk1	Challenge	induced	0.000576207	367.38	754.43	372.93	363.47	673.44	799.97	714.84	735.44	433.2	316.92	503.3	473.8	504.9	718.2	401	430.55	291.26	491.25	294.11	574.09	564.88	566.87	490.29	503.6	443.82	401.72	476.53	284.33	416.63	387.38	310.23	553.53	552.12	678	349.81	634.1	635.32	702.93	749.6	539.36	607.18	485.85	521.51	755.44	907.2	854.08
Sh2d5	Acute	induced	0.000279125	773.5	1075.31	1050.78	1038.48	1059.51	1029.81	1081.84	1018.56	1093.8	1228.99	1212.08	1174.38	1273.47	1257.3	1347.28	1225.08	725.26	722.56	794.86	772.7	834.39	774.26	826.44	820.28	823.41	732.15	790.73	794.72	811.9	916.19	909.94	806.48	735.4	812.55	866.87	889.07	923.19	822.49	775.41	827.58	884.78	953.87	798.75	853.21	920.79	824.96
Sh3rf2	Acute, Challenge	induced	0.000155794	248.84	218	266.53	285.58	314.22	287.55	356.92	303.72	275.16	417.98	381.05	402.11	350.59	335.58	360.71	350.82	227.82	239.82	314.69	248.5	272.49	269.2	217.29	308.98	402.95	357.41	309.38	313.46	322.27	352.03	367.35	267.77	279.45	233.36	237.03	314.18	238.39	326.88	204.44	409.01	317.41	343.22	301.47	223.34	269.44	303.64
Shisa2	Challenge	induced	0.00193747	16.43	36.74	23.03	18.27	58.86	36.81	47.39	55.32	31.84	61.14	29.91	46.76	30.27	24.42	42.16	27.04	52.63	36.36	47.16	113.37	80.55	92.72	92.86	61.58	91.25	131.02	91.61	85.06	64.99	73.79	76.59	13.76	21.5	46.25	52.57	40.11	30.36	77.14	69.18	59.8	67.46	56.83	76.58	29.85	18.54	22.18
Siah2	Acute, Challenge	induced	1.93154e-14	65.73	61.24	71.29	74.04	122.92	114.42	115.95	128	52.3	66.75	84.53	72.47	62.5	64.22	43.1	65.86	49.02	61.12	75.46	96.13	113.37	100.85	142.07	60.48	75.19	91.52	56.25	66.42	60.54	68.41	75.94	62.44	78.07	67.27	74.55	118.42	78.71	105.1	93.96	72.95	64.15	94.72	77.55	47.34	58.09	59.62
Sik1	Acute, Challenge	induced	1.22995e-15	11.74	2.45	17.55	7.69	39.82	33.83	34.28	49.9	12.51	19.96	20.81	8.57	12.7	10.85	14.05	19.41	30.28	29.4	24.01	63.48	57.68	48.8	43.64	37.39	43.8	36.61	33.75	19.81	22.26	19.22	7.79	17.99	5.66	15.77	21.98	35.33	43.85	38.57	20.65	20.33	27.65	23.4	16.48	12.35	16.07	26.34
Sik3	Acute	induced	1.78037e-09	669.04	673.6	651.53	697.13	618.91	580.08	596.88	574.9	637.86	932.04	851.84	863.45	808.61	776.09	979.07	856.24	807.45	635.92	727.98	669.31	656.37	598.59	706.65	792.79	821.95	730.22	748.95	741.11	836.82	857.01	1039.09	668.89	635.84	570.78	756	579.66	575.73	701.96	579.23	749.84	742.11	720.98	774.51	656.63	709.44	715.43
Slc22a23	Acute, Challenge	induced	2.04019e-05	299.31	220.45	270.92	269.24	270.07	264.67	252.06	276.6	311.54	382.42	293.92	415.36	258.8	252.36	251.09	305.75	286.21	217.39	231.51	249.41	257.58	229.35	227.5	313.38	318.27	271.67	299.74	217.91	217.22	258.26	258.31	245.54	253.43	272.25	242.76	255.93	245.13	269.99	227.15	264.3	295.29	347.67	313.1	275.83	270.68	253.73
Slc25a25	Acute, Repeated, Challenge	induced	7.21528e-55	211.28	249.84	259.95	206.73	632.76	513.41	582.76	594.43	210.35	353.1	342.04	346	238.29	255.08	194.88	222.55	193.21	173.29	200.65	399.05	406.75	368.42	409.51	306.78	306.59	315.02	315.01	234.22	225.23	222.9	168.1	179.92	212.7	161.88	154.83	279.8	269.87	353.87	351.05	273.87	300.82	276.36	227.8	175.99	196.52	159.45
Slc2a1	Acute	induced	2.76813e-07	326.3	325.78	299.44	307.7	251.89	318.4	231.89	287.45	360.43	548.37	394.06	444.97	327.16	368.14	384.13	438.17	271.07	242.92	236.66	214.03	260.56	189.5	254.43	256.2	286.88	315.02	291.7	241.21	258.17	271.32	228.46	259.3	261.35	367.91	300.11	222.51	201.28	215.99	269.48	215.27	234.47	251.84	348.97	334.49	417.76	302.25
Slc2a13	Acute	induced	0.00463189	441.33	448.25	468.35	525.97	494.26	472.62	434.55	402.43	451.39	507.82	520.21	551.73	565.44	527.34	619.3	651.71	626.49	659.12	603.65	594.04	576.81	609.16	651.87	680.63	654.79	680.13	575.37	637.4	723.76	773.23	922.92	618.09	635.84	495.1	591.61	718.13	600.47	570.83	517.28	643.41	635.93	597.28	500.19	466.23	609.33	622.53
Slc6a17	Challenge	induced	0.019415	755.9	702.99	650.43	710.59	740.96	677.59	742.06	647.58	798.18	666.9	760.8	656.94	723.65	729.96	719.55	604.57	516.19	451.79	497.33	555.95	517.14	488.79	510.72	554.18	556.97	525.03	548.05	577.98	557.29	618.74	591.91	436.05	428.8	447.8	507.51	525.23	519.5	506.22	507.99	464.02	461.19	532.65	487.58	539.3	677.31	485.27
Slc7a14	Acute	induced	0.00778539	237.1	296.38	231.43	300.01	248.43	279.59	255.08	315.65	351.34	369.32	361.54	353.02	332.04	337.39	311.05	368.84	295.58	293.98	282.1	302.01	277.47	268.39	279.5	333.17	322.65	340.06	327.87	270.34	361.44	377.39	407.59	256.13	338.29	379.47	396.64	334.24	228.27	312.41	342.79	350.41	256.59	353.24	331.52	381.83	292.92	342.46
Slitrk3	Acute	down-regulated	0.00894542	152.59	154.32	152.46	146.16	133.3	122.38	104.86	124.74	145.54	184.66	191.18	162.87	184.58	153.77	179.89	183.03	170.14	145.44	135.48	133.32	123.32	161.03	149.5	175.93	154.75	161.84	145.45	159.64	151.34	166.02	231.05	164.05	160.66	161.88	197.84	136.56	120.32	187.06	142.49	206.9	147.09	201.69	164.79	182.17	155.73	159.45
Snapc5	Acute	down-regulated	0.000556358	253.53	296.38	278.6	271.16	295.17	279.59	290.37	309.15	209.21	214.61	271.81	194.04	216.8	254.17	221.11	222.55	247.28	255.29	254.67	243.06	251.61	282.21	250.72	219.91	229.21	270.7	222.59	261.02	234.13	219.06	215.48	205.32	201.39	193.41	199.75	270.25	249.63	213.1	235.41	221.25	231.15	222.87	178.36	183.2	220	217.68
Sox8	Acute	induced	4.90285e-07	53.99	80.83	80.07	94.23	96.08	132.33	117.96	128	83	61.14	59.82	80.27	72.27	58.79	74.95	74.88	118.23	102.89	136.34	135.13	154.15	170.79	178.29	139.64	105.85	108.86	135.81	138.67	106.83	110.68	87.62	131.24	110.88	115.63	137.63	158.52	122.57	153.31	150.75	81.32	120.55	127.03	95	126.59	150.79	120.62
Sp2	Challenge	down-regulated	0.0138987	65.73	56.34	70.2	58.65	45.01	54.72	51.42	42.3	76.18	59.27	59.82	74.81	64.45	70.55	74.02	72.8	85.79	98.25	72.88	75.27	78.57	56.93	71.5	68.17	94.17	76.11	65.89	97.88	97.04	99.92	110.33	59.27	82.59	91.45	63.08	65.89	69.72	69.42	68.15	87.3	77.42	83.58	74.64	74.1	65.51	76.26
Spryd3	Acute	induced	0.0106844	257.05	279.24	325.76	396.16	435.4	456.7	472.86	398.09	454.8	410.5	374.55	419.25	464.86	468.55	405.68	405.59	358.3	355.09	301.83	307.45	319.24	328.57	356.58	361.76	316.81	324.65	326.26	311.13	302.68	309.75	308.29	338.68	331.5	272.25	333.56	332.33	303.61	253.59	310.78	374.32	314.1	301.99	318.92	302.59	336.18	262.05
Spty2d1	Acute, Repeated, Challenge	induced	1.86145e-25	44.6	34.29	39.49	44.23	83.96	88.55	102.84	124.74	45.48	36.81	54.62	38.18	43.95	42.51	24.36	45.76	56.95	44.87	55.73	73.46	84.53	100.85	103.07	50.58	68.62	49.13	54.64	55.93	52.52	52.27	53.87	56.09	53.18	32.59	64.04	77.35	87.71	93.53	85.7	53.82	54.19	50.15	42.65	49.4	53.15	41.59
Srf	Acute	induced	0.00795724	275.83	262.09	274.21	313.47	337.59	345.26	340.78	331.93	321.77	428.59	323.83	427.05	292.98	298.5	286.69	288.42	285.49	223.58	243.52	298.38	284.43	310.68	334.29	296.88	273.01	327.54	303.76	276.17	242.14	276.7	286.22	185.22	253.43	230.21	261.88	235.88	231.64	342.3	264.32	243.97	251.06	337.64	333.46	228.48	218.77	205.2
Srgap1	Acute	induced	1.59957e-06	255.88	235.15	302.73	261.54	248.43	256.71	259.12	266.84	314.95	390.53	339.43	377.95	374.03	335.58	401	390.34	265.3	204.24	269.24	278.43	241.66	234.23	236.79	318.87	335.79	253.36	309.38	263.35	274.19	313.6	364.75	231.78	311.13	212.34	296.28	212.96	213.65	259.38	234.38	302.57	283.13	379.99	287.9	219.22	306.52	324.44
Srrt	Acute	induced	0.0141863	436.64	460.5	472.74	446.16	493.4	443.76	488.99	493.55	486.64	550.86	581.33	510.43	636.74	583.42	553.71	580.3	431.12	422.4	427.87	409.93	439.57	443.25	409.51	457.42	475.94	389.2	486.98	384.54	452.24	454.25	482.23	476.27	491.02	600.22	578.23	501.36	490.27	508.15	464.63	493.92	496.58	588.37	504.06	525.92	511.69	571.23
Sstr2	Acute	down-regulated	0.000543676	36.39	22.05	24.13	23.08	47.61	36.81	33.27	36.88	21.6	39.93	20.81	25.72	14.65	25.33	10.31	20.11	22.35	14.7	18.86	38.09	21.88	42.29	37.14	32.99	34.31	37.57	24.11	34.96	31.16	32.28	33.1	8.47	1.13	9.46	16.25	18.14	16.87	29.89	43.37	14.35	16.59	32.32	28.11	7.2	19.78	9.71
Stk40	Acute	induced	0.000927446	66.9	61.24	69.1	75.96	161.87	109.45	104.86	137.76	89.82	94.2	117.05	95.07	84.96	95.88	99.31	72.8	91.56	60.34	70.31	96.13	128.29	109.79	101.22	104.46	100.01	124.27	77.14	118.86	67.66	82.24	59.71	69.85	71.28	77.79	101.31	92.63	83.21	137.89	100.15	107.63	96.22	114.78	86.27	65.87	80.34	66.55
Suco	Challenge	induced	0.0081037	158.46	173.91	182.08	180.77	206.02	187.06	202.66	182.23	154.63	219.6	247.1	250.15	140.63	175.48	187.38	178.87	160.05	173.29	160.34	197.71	206.86	184.62	202.43	197.92	229.94	225.43	247.51	164.3	195.85	168.33	202.5	160.87	160.66	132.45	164.39	159.48	167.55	212.13	168.3	199.72	182.49	166.04	166.73	157.47	175.51	156.67
Syne1	Acute	induced	1.5909e-08	409.64	556.02	549.52	561.55	499.46	570.13	495.04	501.14	577.6	615.74	690.57	647.58	729.51	727.24	705.49	874.96	689.94	633.6	625.94	574.99	676.26	597.77	587.8	754.3	630.7	744.67	618.77	834.34	741.57	675.62	644.48	748.27	851.94	630.7	634.62	645.56	593.72	748.25	615.37	790.51	718.88	675.29	698.9	681.33	898.54	926.17
Syt6	Acute, Challenge	induced	0.0182708	288.74	269.44	346.6	323.08	378.27	290.54	334.73	353.62	347.93	403.63	360.24	399.77	452.16	364.53	406.62	435.4	281.16	282.37	284.68	334.66	337.14	331.01	340.79	348.56	324.11	310.2	368.04	355.41	338.29	319.75	379.03	281.53	296.42	256.48	331.65	336.15	275.49	355.8	287.04	270.28	284.23	371.07	307.28	265.53	290.45	346.62
Syt7	Acute, Challenge	induced	0.0011531	407.29	409.06	424.48	452.89	444.06	437.79	497.06	545.62	498.01	539.01	512.4	541.6	511.73	584.33	545.28	500.57	446.26	436.32	439.02	491.55	538.03	529.46	496.79	631.15	576.68	479.75	554.48	604.78	533.25	574.16	500.4	407.47	399.38	505.61	451.12	383.9	463.28	518.76	486.31	456.84	501.01	541.57	492.43	478.58	449.89	499.14
Tbc1d30	Acute	induced	0.000964346	165.5	249.84	231.43	281.74	327.2	383.07	313.56	375.31	294.49	434.2	408.36	362.37	335.95	284.93	263.27	361.91	199.7	175.61	205.79	222.2	245.64	225.28	210.79	218.81	257.68	280.34	214.56	228.39	233.24	189.85	260.26	215.91	219.49	156.62	182.55	282.67	190.04	262.27	205.47	258.32	236.68	280.81	220.04	170.85	211.35	221.84
Tcaf1	Acute	induced	0.0127078	703.08	536.43	643.85	653.86	760.01	723.36	737.02	677.95	702.67	756.73	790.71	812.79	767.6	824.93	845.09	798	974.7	860.27	848.03	891.51	964.67	954	819.94	989.61	914.66	986.48	932.97	964.85	965.02	1050.7	982.63	775.79	787.45	816.76	774.16	837.5	711.79	904.45	765.08	850.3	819.53	967.24	929.61	801.75	763.82	877.65
Tet2	Challenge	induced	3.40702e-07	62.21	93.08	75.68	59.62	90.02	93.53	80.66	92.2	68.22	101.06	63.73	116.89	59.57	51.56	63.71	62.4	144.19	148.54	120.9	170.5	198.9	211.46	170.86	191.32	206.58	157.03	170.36	120.02	115.73	126.82	68.8	148.17	117.66	140.86	103.22	153.75	219.27	175.49	152.81	169.82	163.68	182.75	122.14	151.29	143.37	170.54
Tet3	Challenge	induced	0.0181286	70.43	90.63	96.52	68.27	58	67.66	80.66	90.03	64.81	101.06	93.64	93.51	84.96	73.27	79.64	75.57	81.47	85.87	77.17	69.83	88.51	92.72	85.43	101.16	116.07	125.24	109.29	106.04	114.84	110.68	96.7	68.79	49.78	87.25	67.86	94.54	91.08	89.67	93.96	76.54	81.84	100.29	96.94	95.72	88.99	79.03
Tiparp	Acute, Repeated, Challenge	induced	5.00048e-111	32.87	61.24	75.68	43.27	208.61	259.69	263.15	264.67	46.62	72.37	48.12	64.68	65.43	57.89	55.28	47.15	85.79	72.72	124.33	271.17	338.13	301.73	310.15	106.66	116.07	144.5	92.41	107.21	91.69	77.63	62.96	55.04	99.56	62.02	81.24	231.1	257.5	351.95	335.56	87.3	120.55	135.95	104.69	73.07	100.11	77.64
Tlnrd1	Acute, Challenge	induced	1.67195e-09	197.19	208.2	259.95	271.16	336.72	408.94	400.27	322.16	316.09	376.81	339.43	325.74	247.08	281.31	277.33	231.57	309.28	237.5	276.1	359.14	311.28	264.32	294.36	361.76	351.85	341.99	380.1	268.01	258.17	224.44	305.69	221.2	263.61	220.75	251.36	275.03	203.53	348.09	296.33	285.83	337.32	361.05	359.63	286.12	270.68	230.16
Tmem204	Acute	induced	0.0102933	10.56	24.49	19.74	22.12	17.31	29.85	23.19	14.1	26.15	44.92	40.32	32.73	39.06	29.85	39.35	41.6	18.74	20.11	17.15	29.02	43.76	40.66	20.43	19.79	29.93	24.08	25.71	26.8	24.04	22.29	31.15	20.11	28.28	38.89	20.07	32.47	21.36	27	37.17	21.53	29.86	24.52	30.05	37.05	39.55	19.41
Tmem258	Acute	down-regulated	0.0478438	437.81	399.26	444.22	434.62	465.7	448.74	440.6	479.45	409.32	304.44	368.05	304.7	362.31	435.98	356.03	336.95	465	497.44	453.6	493.37	480.34	508.31	443.86	476.11	412.44	468.19	494.21	533.7	363.22	421.97	382.93	403.24	369.96	342.68	326.87	362.89	403.68	327.84	260.19	328.88	369.39	385.56	367.38	314.94	284.27	329.98
Trak1	Acute, Challenge	induced	1.61761e-08	409.64	511.93	460.67	479.82	628.43	578.09	565.62	656.26	560.55	821.62	661.96	673.3	513.69	461.31	589.32	550.49	539.98	420.85	527.34	567.74	626.54	568.49	575.72	644.35	750.41	694.58	687.07	522.04	505.66	606.44	604.89	458.28	480.84	488.79	532.35	572.02	558.86	590.11	575.1	580.02	577.32	647.43	637.83	501.22	653.82	454.77
Trib1	Acute, Repeated, Challenge	induced	1.4981e-08	30.52	56.34	43.87	42.31	38.95	63.68	81.67	64	30.7	39.3	27.31	41.3	29.3	36.18	30.92	28.43	28.84	23.21	34.3	68.93	47.74	39.85	61.29	38.48	39.42	51.06	36.97	29.13	29.38	26.13	33.75	23.28	20.37	31.54	21.98	31.51	42.73	59.78	61.95	23.92	38.71	23.4	28.11	34.99	22.25	37.44
Tsc22d1	Challenge	induced	7.11237e-05	2245.39	2116.32	2080.71	2336.58	2346.67	2543.19	2308.86	2466.66	2204.66	2660.11	2495.69	2660.47	1962.94	2284.85	2145.52	2371.13	1951.57	2084.91	2013.31	2437.82	2266.47	2383.77	2286.18	2448.73	2450.53	2440.18	2577.12	2028.74	2128.56	2050.68	1773.14	1703.98	1686.9	1876.33	1679.26	1616.75	1709.19	1871.58	2117.66	1951.75	1933.24	1833.08	2056	1882.41	1732.82	1744.2
Tspyl2	Challenge	induced	0.00643723	338.04	338.02	374.02	372.12	429.34	401.98	383.13	379.65	388.86	341.25	403.16	318.73	360.36	386.23	347.59	366.76	219.16	179.48	224.65	277.52	284.43	256.19	305.51	292.48	286.15	268.78	266.79	242.38	264.4	239.04	267.4	307.99	251.17	285.92	259.01	326.6	292.36	315.3	286	293	265.43	264.1	248.15	275.83	375.73	245.41
Txndc17	Acute	down-regulated	0.00181503	271.14	200.85	232.53	247.12	277.86	284.57	269.2	251.66	264.92	199.63	224.99	204.17	175.79	207.14	206.12	202.45	247.28	263.03	257.24	241.24	278.46	280.59	316.65	221.01	240.16	279.37	270.81	228.39	266.18	219.83	230.4	257.18	238.72	209.18	206.44	261.66	283.37	259.38	244.7	261.91	251.06	257.41	241.37	242.89	217.53	253.73
Ubash3b	Acute, Challenge	induced	0.000176414	109.16	100.43	87.75	72.12	126.38	98.5	110.91	130.17	92.1	190.28	213.28	195.6	157.23	148.34	191.13	140.05	164.37	91.29	140.62	135.13	185.97	143.95	128.15	216.61	246.73	237.95	190.45	180.62	185.17	175.25	179.78	91.02	100.69	57.81	91.75	125.1	69.72	146.56	66.08	156.67	121.66	167.15	120.2	100.86	123.6	145.58
Usp28	Acute	induced	0.0346025	120.9	129.82	157.95	160.58	115.99	136.31	149.22	114.98	151.22	167.82	154.76	171.44	194.34	159.2	180.82	203.14	120.4	133.06	143.2	122.44	105.42	125.25	111.43	116.55	149.64	113.68	113.31	145.66	164.69	122.21	153.82	156.64	138.03	146.11	159.61	168.07	132.69	154.28	163.14	182.98	169.21	174.95	140.56	138.94	138.43	188.56
Usp31	Acute	induced	0.0138838	163.15	208.2	228.14	198.08	201.69	187.06	181.48	162.71	209.21	282.61	243.2	273.53	256.84	225.23	243.6	250.29	272.51	245.24	263.24	224.92	190.94	252.12	221	241.9	264.25	258.18	261.97	262.19	230.57	242.12	247.93	208.5	218.36	229.15	245.63	258.8	188.91	271.91	219.92	233.21	254.37	199.47	284.02	210.99	229.89	226
Usp36	Challenge	induced	0.0324747	58.69	61.24	65.81	61.54	89.16	77.61	76.63	82.44	62.54	72.99	52.02	75.59	64.45	82.31	60.9	58.24	37.49	27.85	47.16	56.23	70.61	56.12	67.79	60.48	64.97	50.09	43.39	54.77	48.07	39.97	46.73	44.45	57.7	54.66	63.08	53.48	50.6	87.75	78.47	44.25	64.15	61.29	62.04	66.9	56.85	30.5
Vegfa	Acute	induced	2.67628e-07	123.24	139.62	166.72	150.96	264.01	224.87	217.78	245.15	163.73	268.26	249.7	203.39	208.01	172.77	205.18	176.79	171.58	179.48	195.5	253.03	249.62	274.89	216.36	260.6	300.02	254.33	229.02	195.77	178.94	212.14	281.03	219.08	186.68	240.72	237.98	327.55	263.13	255.52	328.34	204.5	240	247.38	284.02	220.25	156.97	173.31
Vps37b	Acute, Challenge	induced	5.89008e-06	125.59	151.87	157.95	155.77	213.81	185.07	230.89	213.69	142.13	143.49	128.75	143.39	144.53	173.67	153.65	101.22	105.98	119.91	133.76	134.23	147.19	131.75	213.58	89.06	103.66	103.08	112.5	93.22	104.16	118.37	120.07	109.01	115.4	110.37	143.36	141.33	102.33	142.71	139.39	118.4	122.76	117.01	126.99	132.77	127.3	88.74
Vps37d	Repeated	induced	0.00248597	82.16	73.48	72.39	72.12	70.11	79.6	90.74	113.9	56.85	58.02	55.92	74.03	71.29	65.13	65.58	37.44	52.63	76.59	63.45	87.97	48.73	68.32	51.07	57.18	58.4	54.91	72.32	55.93	52.52	71.48	40.89	52.92	53.18	59.92	62.12	64.94	91.08	73.28	90.86	45.45	54.19	45.69	44.59	26.76	58.09	42.98
Wipf3	Acute	induced	0.000490059	1253.57	1445.17	1371.05	1375.98	1357.28	1454.67	1428.67	1287.57	1363.28	1613.29	1552.82	1621.69	1726.61	1612.78	1654.58	1764.48	1247.94	1454.41	1282.76	1232.51	1290.86	1291.51	1481.1	1419.54	1276.73	1356.41	1370.12	1255	1339.81	1563.37	1631.65	1424.57	1579.42	1564.14	1392.53	1271.06	1277.4	1466.6	1275.14	1528.39	1401.27	1566.76	1406.53	1420.3	1594.39	1501.57
Yap1	Acute	down-regulated	0.0052689	167.85	161.66	137.11	130.77	80.5	100.49	75.62	87.86	122.8	127.89	94.94	133.26	115.24	134.78	140.54	108.16	138.42	131.52	106.32	137.85	147.19	137.45	161.57	123.15	91.98	113.68	122.95	145.66	139.77	116.83	110.33	109.01	63.36	142.96	115.65	93.59	87.71	100.28	116.67	96.87	90.69	79.12	135.71	111.15	106.29	103.99
Zc3h12c	Acute	induced	0.0443504	14.09	19.6	18.65	19.23	37.22	32.83	30.25	28.2	27.29	31.82	18.21	20.26	11.72	19.9	15.93	21.49	34.6	30.94	56.59	56.23	45.75	44.73	34.36	30.79	49.64	46.24	38.57	37.29	30.27	39.2	25.31	28.58	42.99	23.13	19.12	44.88	47.23	30.86	49.56	28.7	40.92	34.54	41.68	27.79	18.54	31.89
Zdbf2	Challenge	induced	3.71482e-05	109.16	73.48	139.3	93.27	186.11	176.11	158.29	196.33	100.06	258.9	189.88	212.74	141.61	128.44	174.27	167.78	192.49	184.12	187.78	244.87	263.54	289.53	294.36	351.86	327.03	333.32	227.42	243.54	250.16	243.65	310.23	151.35	138.03	104.07	139.54	229.19	169.79	169.71	164.17	243.97	199.08	190.55	204.53	121.45	123.6	146.97
Zdhhc14	Acute, Repeated, Challenge	induced	2.81133e-21	404.94	394.36	420.09	418.28	356.63	308.45	325.66	334.09	438.89	638.2	595.64	593.03	581.07	529.15	647.4	669.05	422.47	286.24	445.02	374.56	350.07	313.93	392.79	499.2	489.08	471.08	487.78	510.39	525.24	558.02	622.42	343.97	368.83	284.87	443.47	314.18	230.52	362.55	247.8	420.97	358.34	430.13	450.75	348.9	454.83	496.36
Zfhx2	Acute	induced	0.0194782	210.1	210.65	277.5	247.12	283.92	304.47	298.44	336.26	304.72	322.53	366.75	363.15	318.37	319.3	236.1	248.21	372.72	252.97	322.4	343.73	396.81	401.77	285.08	382.65	351.12	409.43	411.44	320.45	347.19	382	314.13	248.72	300.95	292.22	324	327.55	282.24	390.52	336.6	285.83	398.15	382.22	359.63	296.41	330	268.98
Zfp516	Acute	induced	2.60224e-05	64.56	36.74	38.39	46.15	100.41	108.45	85.7	112.81	38.66	79.85	70.23	90.4	60.55	47.94	74.02	74.18	59.12	60.34	64.31	80.72	77.57	71.57	73.36	54.98	102.93	80.92	89.2	73.41	71.22	69.94	62.31	75.14	71.28	73.58	59.26	87.86	62.97	88.71	67.11	45.45	76.31	61.29	86.27	69.99	55.62	51.3
Zfp746	Acute	induced	0.0287118	97.42	68.58	72.39	82.69	73.58	50.74	79.65	78.1	104.61	126.02	101.44	123.13	93.75	94.07	101.19	112.32	99.49	90.51	110.61	107.02	105.42	105.73	94.72	130.85	102.93	105.97	87.59	95.55	89.02	113.76	114.88	79.38	102.96	115.63	108	77.35	97.83	86.78	115.64	95.67	106.17	133.72	100.81	99.83	97.64	99.83
Zfp948	Acute, Repeated, Challenge	induced	1.67311e-38	50.47	48.99	43.87	45.19	112.53	122.38	104.86	137.76	48.89	68.62	46.82	63.9	51.76	52.46	54.34	49.92	67.77	62.66	61.74	120.62	157.13	116.3	119.79	73.67	89.06	86.7	96.43	88.56	70.33	53.03	55.17	61.39	73.54	84.09	68.81	134.65	137.19	159.1	121.84	69.36	106.17	82.46	64.95	67.93	59.33	61.01
Zswim5	Challenge	induced	0.0285164	78.64	80.83	97.62	86.54	87.43	87.56	94.77	69.42	81.86	68.62	65.03	68.58	97.66	94.07	105.87	83.89	75.7	63.44	80.6	70.74	97.46	67.5	74.29	61.58	67.89	66.47	67.5	94.39	82.79	116.06	104.49	91.02	70.15	79.89	59.26	64.94	64.09	74.25	62.98	81.32	65.25	85.8	81.43	63.81	85.28	81.8
[truncated: 2 more columns]
