# Supplementary material for: Egr2 induction in spiny projection neurons of the ventrolateral striatum contributes to cocaine place preference in mice
Source: eLife. 2021 Mar 16;10:e65228. doi: 10.7554/eLife.65228 (PMC8057818; doi:10.7554/eLife.65228)
Supplement: Supplementary file 5. [file elife-65228-supp5.xlsx]

## Sheet: GO_geneID
Supplementary Table S5: Gene Ontology annotation of cocaine-induced genes in the dorsal striatum
	Acute_1h	Acute_2h	Acute_4h	Repeated_1h	Repeated_2h	Repeated_4h	Challenge_1h	Challenge_2h	Challenge_4h
MAP kinase tyrosine/serine/threonine phosphatase activity	Dusp14/Dusp1/Dusp5/Dusp6	NA	NA	Dusp1/Dusp5/Dusp6	NA	NA	Dusp1/Dusp5/Dusp6	NA	NA
transcription factor activity, RNA polymerase II core promoter proximal region sequence-specific binding	Arid3b/Atf4/Bhlhe40/Btg2/Egr1/Egr2/Fosb/Fos/Junb/Jun/Nr4a1/Nr4a3	Srf/Zfp746	NA	Atf4/Btg2/Egr1/Egr2/Fosb/Fos/Junb/Npas4/Nr4a1/Nr4a3	NA	NA	Atf4/Btg2/Egr1/Egr2/Fos/Junb/Jun/Klf10/Nr4a1	Fosb/Nr4a3/Hes5/Tsc22d1	NA
transcriptional activator activity, RNA polymerase II core promoter proximal region sequence-specific binding	Arid3b/Atf4/Egr1/Egr2/Fosb/Fos/Junb/Jun/Nr4a1/Nr4a3	NA	NA	Atf4/Egr1/Egr2/Fosb/Fos/Junb/Npas4/Nr4a1/Nr4a3	NA	NA	Atf4/Egr1/Egr2/Fos/Junb/Jun/Klf10/Nr4a1	Fosb/Nr4a3/Tsc22d1	NA
activating transcription factor binding	Bhlhe40/Cited2/Egr2/Fos/Jun/Zfp516	NA	NA	Egr2/Fos	NA	NA	Egr2/Fos/Jun	NA	NA
RNA polymerase II activating transcription factor binding	Bhlhe40/Cited2/Egr2/Fos/Jun	NA	NA	Egr2/Fos	NA	NA	Egr2/Fos/Jun	NA	NA
core promoter proximal region sequence-specific DNA binding	Arid3b/Atf4/Egr2/Fosb/Fos/Junb/Jun/Nr4a3/Per1/Zfp516	Paxbp1/Srf/Zfp746	NA	Atf4/Egr2/Fosb/Fos/Junb/Npas4/Nr4a3/Per1	NA	NA	Atf4/Egr2/Fos/Junb/Jun/Klf10/Per1	Fosb/Nr4a3/Tsc22d1	NA
protein tyrosine/serine/threonine phosphatase activity	Dusp14/Dusp1/Dusp5/Dusp6	NA	NA	Dusp1/Dusp5/Dusp6/Epm2a	NA	NA	Dusp1/Dusp5/Dusp6	NA	NA
transcription factor activity, transcription factor binding	Bhlhe40/Cited2/Dnajb1/Erf/Fos/Irf2bp2/Junb/Jun/Map3k10/Per1	Kctd1/Maml3/Srf	NA	Fos/Junb/Per1	NA	Arid5b/Hif3a	Fos/Junb/Jun/Per1	Dnajb1/Per2	NA
RNA polymerase II core promoter proximal region sequence-specific DNA binding	Arid3b/Atf4/Egr2/Fosb/Fos/Junb/Jun/Nr4a3/Per1	Paxbp1/Srf/Zfp746	NA	Atf4/Egr2/Fosb/Fos/Junb/Npas4/Nr4a3/Per1	NA	NA	Atf4/Egr2/Fos/Junb/Jun/Klf10/Per1	Fosb/Nr4a3/Tsc22d1	NA
SMAD binding	Cited2/Fos/Jun	NA	NA	NA	NA	Acvr1/Pmepa1	Fos/Jun	NA	NA
protein serine/threonine kinase activity	Map3k10/Mknk2/Pim3/Plk2/Sik1/Stk40	Lrrk2/Pim1/Sbk1	Acvr1/Mapk4/Sik3	Cdkn1a/Pim3	NA	NA	Plk2/Sgk1/Sik1	Cdkn1a/Cdk13/Plk3	NA
steroid hormone receptor activity	Nr4a1/Nr4a3	NA	NA	Nr4a1/Nr4a3	NA	NA	NA	NA	NA
transcriptional repressor activity, RNA polymerase II transcription regulatory region sequence-specific binding	Bcl6/Bhlhe40/Btg2	NA	NA	Btg2/Mxd3	Bhlhe40/Jarid2	NA	NA	Bcl6/Hes5/Jarid2	NA
transcription coactivator activity	Cited2/Junb/Jun	NA	NA	NA	NA	Arid5b/Hif3a	Junb/Jun	NA	NA
GTPase activator activity	Jun/Rgs2	Lrrk2/Tbc1d30	Rgs20/Srgap1	NA	NA	NA	Jun/Rgs20/Rgs2	NA	NA
ion channel binding	NA	Abcc9/Lrrk2/Nedd4l	Homer1/Tcaf1	NA	NA	NA	NA	NA	NA
potassium channel regulator activity	NA	Abcc9/Nedd4l	NA	NA	NA	NA	NA	NA	NA
ion channel regulator activity	NA	Abcc9/Nedd4l	NA	NA	NA	NA	NA	NA	NA
glutamate receptor binding	NA	NA	Dlg2/Homer1/Ptpn5	NA	NA	NA	NA	NA	NA
transmembrane receptor protein kinase activity	NA	NA	Acvr1/Insr/Ntrk3	NA	NA	NA	NA	NA	NA
connexin binding	NA	NA	NA	Cnst/Cxadr	NA	NA	NA	NA	NA
cyclin binding	NA	NA	NA	NA	NA	NA	NA	Cdkn1a/Cdk13	NA
cyclin-dependent protein serine/threonine kinase activity	NA	NA	NA	NA	NA	NA	NA	Cdkn1a/Cdk13	NA
cyclin-dependent protein serine/threonine kinase regulator activity	NA	NA	NA	Ccnl1/Cdkn1a	NA	NA	NA	NA	NA
modification-dependent protein binding	NA	NA	NA	NA	NA	NA	NA	Kdm7a/Brd2	NA
