# Supplementary material for: Egr2 induction in spiny projection neurons of the ventrolateral striatum contributes to cocaine place preference in mice
Source: eLife. 2021 Mar 16;10:e65228. doi: 10.7554/eLife.65228 (PMC8057818; doi:10.7554/eLife.65228)
Supplement: Supplementary file 6. [file elife-65228-supp6.xlsx]

## Sheet: Sheet1
Supplementary Table S6. Statistical Analysis
Figure	Mice and 'n' numbers	Statistical analysis
Figure 1 B		Linear model including the locomotion as the dependent variable and experiment day as independent variable
	WT mice: acute group: n = 59	ANOVA p<0.0001, F 8,312 = 178.9
	WT mice: Repeated group: n = 30	model coefficients (comparing to saline day 1):
	WT mice: challenge group: n = 15	saline day 2 p= 0.26
		saline day 3 p= 0.02
		cocaine day 1 p<0.0001
		cocaine day 2 p<0.0001
		cocaine day 3 p<0.0001
		cocaine day 4 p<0.0001
		cocaine day 5 p<0.0001
		cocaine day 21 p<0.0001
Figure 2 E		Two-way ANOVA following post-hoc Tukey's test (treatment - control/cocaine and experiment - acute, repeated, challenge)
Fraction	WT mice: Egr2- Acute (0hr and 1h; n= 12 sections from 3 mice)	MS:
	WT mice: Egr2- Repeated (0hr and 1h; n= 12 sections from 3 mice)	ANOVA interaction experiment: treatment p=0.002, F 2,66 =6.45
	WT mice: Egr2- Challenge (0hr and 1h; n= 12 sections from 3 mice)	Acute: control-cocaine p<0.0001
		Repeated: control-cocaine p<0.0001
		Challenge: control-cocaine p<0.0001
		Control: Acute-Repeated p=0.02
		Control: Acute-Challenge p=0.007
		Cocaine: Acute-Repeated p=0.0004
		Cocaine: Acute-Challenge p=0.99
		VLS:
		ANOVA interaction experiment: treatment p<0.0001, F 2,66 = 21.4
		Acute: control-cocaine p<0.0001
		Repeated: control-cocaine p<0.0001
		Challenge: control-cocaine p<0.0001
		Control: Acute-Repeated p=0.99
		Control: Acute-Challenge p=0.84
		Cocaine: Acute-Repeated p<0.0001
		Cocaine: Acute-Challenge p=0.23
	WT mice: Fos- Acute (0hr and 1h; n= 6 sections from 3 mice)	ANOVA following post-hoc Tukey's test
	WT mice: Fos- Repeated (0hr and 1h; n= 6 sections from 3 mice)	MS:
	WT mice: Fos- Challenge (0hr and 1h; n= 6 sections from 3 mice)	ANOVA interaction experiment: treatment p=0.06, F 2,30 =3.12
		Acute: control-cocaine p<0.0001
		Repeated: control-cocaine p<0.0001
		Challenge: control-cocaine p<0.0001
		Control: Acute-Repeated p=0.03
		Control: Acute-Challenge p=0.01
		Cocaine: Acute-Repeated p=0.66
		Cocaine: Acute-Challenge p=0.99
		VLS:
		ANOVA interaction experiment: treatment p=0.01, F 2,30=5
		Acute: control-cocaine p<0.0001
		Repeated: control-cocaine p=0.002
		Challenge: control-cocaine p<0.0001
		Control: Acute-Repeated p=0.99
		Control: Acute-Challenge p=0.99
		Cocaine: Acute-Repeated p=0.0006
		Cocaine: Acute-Challenge p=0.89
Figure 2 F		Two-way ANOVA following post-hoc Tukey's test (treatment - control/cocaine and experiment - acute, repeated, challenge)
Puncta/cell	WT mice: Egr2- Acute (0hr and 1h; n= 12 sections from 3 mice)	MS:
	WT mice: Egr2- Repeated (0hr and 1h; n= 12 sections from 3 mice)	ANOVA interaction experiment: treatment p=0.0003, F 2,66 = 9.01
	WT mice: Egr2- Challenge (0hr and 1h; n= 12 sections from 3 mice)	Acute: control-cocaine p<0.0001
		Repeated: control-cocaine p<0.0001
		Challenge: control-cocaine p<0.0001
		Control: Acute-Repeated p=0.35
		Control: Acute-Challenge p=0.19
		Cocaine: Acute-Repeated p<0.0001
		Cocaine: Acute-Challenge p=0.99
		VLS:
		ANOVA interaction experiment: treatment p<0.0001, F 2,66 = 21.7
		Acute: control-cocaine p<0.0001
		Repeated: control-cocaine p=0.07
		Challenge: control-cocaine p<0.0001
		Control: Acute-Repeated p=0.99
		Control: Acute-Challenge p=0.99
		Cocaine: Acute-Repeated p<0.0001
		Cocaine: Acute-Challenge p=0.09
	WT mice: Fos- Acute (0hr and 1h; n= 6 sections from 3 mice)	ANOVA following post-hoc Tukey's test
	WT mice: Fos- Repeated (0hr and 1h; n= 6 sections from 3 mice)	MS:
	WT mice: Fos- Challenge (0hr and 1h; n= 6 sections from 3 mice)	ANOVA interaction experiment: treatment p=0.04, F 2,30 = 3.4
		Acute: control-cocaine p<0.0001
		Repeated: control-cocaine p<0.0001
		Challenge: control-cocaine p<0.0001
		Control: Acute-Repeated p=0.1
		Control: Acute-Challenge p=0.027
		Cocaine: Acute-Repeated p=0.27
		Cocaine: Acute-Challenge p=0.99
		VLS:
		ANOVA interaction experiment: treatment p=0.01, F2,30 = 4.89
		Acute: control-cocaine p<0.0001
		Repeated: control-cocaine p=0.08
		Challenge: control-cocaine p<0.0001
		Control: Acute-Repeated p=0.99
		Control: Acute-Challenge p=0.99
		Cocaine: Acute-Repeated p=0.0009
		Cocaine: Acute-Challenge p=0.76
Figure 3 B		Linear model
VLS		Acute:
		Egr2-D1, control, slope = 0.028, r2 = 0.038, p < 0.0001
		Egr2-D1, cocaine, slope = 0.65, r2 = 0.50, p < 0.0001
		Egr2-D2, control, slope = 0.029, r2 = 0.040, p < 0.0001
		Egr2-D2, cocaine, slope = -0.036, r2 = 0.0017, p < 0.0001
		Repeated:
		Egr2-D1, control, slope = 0.019, r2 = 0.02, p < 0.0001
		Egr2-D1, cocaine, slope = 0.11, r2 = 0.1, p < 0.0001
		Egr2-D2, control, slope = 0.03, r2 = 0.069, p < 0.0001
		Egr2-D2, cocaine, slope = 0.06, r2 = 0.03, p < 0.0001
		Challenge:
		Egr2-D1, control, slope = 0.048, r2 = 0.05, p < 0.0001
		Egr2-D1, cocaine, slope = 0.51, r2 = 0.4, p < 0.0001
		Egr2-D2, control, slope = 0.07, r2 = 0.1, p < 0.0001
		Egr2-D2, cocaine, slope = -0.048, r2 = 0.004, p < 0.0001
Figure 3 E		One-tailed paired t-test comparing percent time spent
Percent time spent	Egr2-CreDIO-hM4Di/Saline ;n = 6	Pre-test vs. Post-test (Test 1): hM4Di/Saline p=0.02, t = -2.6, df = 5; hM4Di/CNO p=0.002, t = -4.9, df = 5
	Egr2-CreDIO-hM4Di/CNO ;n = 6	Pre-test vs. Post-test (Test 2): hM4Di/Saline p<0.03, t = -2.3 df = 5; hM4Di/CNO p=0.006, t = -3.8, df = 5
		Pre-test vs. Post-test (Test 3): hM4Di/Saline p=0.0006, t = -6.5, df = 5; hM4Di/CNO p=0.04, t = -2.1, df = 5
Preference score	Egr2-CreDIO-hM4Di/Saline ;n = 6	One-tailed unpaired t-test comparing preference scores (post-test minus pre-test)
	Egr2-CreDIO-hM4Di/CNO ;n = 6	Test 1; mcherry/CNO vs. hM4Di/CNO p=0.8, t = -0.9, df = 9.4
		Test 2; mcherry/CNO vs. hM4Di/CNO p=0.5, t = 0.003, df = 8.4
		Test 3; mcherry/CNO vs. hM4Di/CNO p=0.04, t = 2, df = 8.6
Figure 3 G		One-tailed paired t-test comparing percent time spent
Percent time spent	Egr2-CreDIO-mcherry/CNO ;n = 7	Pre-test vs. Post-test mcherry/CNO p<0.0001, t = -11.362, df = 6
	Egr2-CreDIO-hM4Di/CNO ;n = 7	Pre-test vs. Post-test hM4Di/CNO p=0.003, ,t = -4.1232, df = 6
Preference score	Egr2-CreDIO-mcherry/CNO ;n = 7	One-tailed unpaired t-test comparing preference scores (post-test minus pre-test)
	Egr2-CreDIO-hM4Di/CNO ;n = 7	mcherry/CNO vs. hM4Di/CNO p=0.04, t = 1.95, df = 9.4
Figure 3 I		One-tailed paired t-test comparing percent time spent
Percent time spent	WTGFP ;n = 8	Pre-test vs. Post-test WTGFP p=0.0008, t = -4.9782, df = 7
	WTDNEgr2 ;n = 8	Pre-test vs. Post-test WTDNEgr2 p=0.03, t = -2.2199, df = 7
Preference score	WTGFP ;n = 8	One-tailed unpaired t-test comparing preference scores (post-test minus pre-test)
	WTDNEgr2 ;n = 8	WTGFP vs. WTDNEgr2 p=0.016, t = 2.36, df = 14
Figure 2 – figure supplement 1 A		Two-way ANOVA followed by post-hoc Tukey's test (treatment - control/cocaine)
Fraction	WT mice: Arc- Acute (0hr and 1h; n= 3 sections from 3 mice)	MS Arc:
	WT mice: Arc- Repeated (0hr and 1h; n= 3 sections from 3 mice)	ANOVA treatment p<0.0001, F 1,12 = 69.5
	WT mice: Arc- Challenge (0hr and 1h; n= 3 sections from 3 mice)	Acute control-cocaine p=0.02
		Repeated control-cocaine p=0.005
		Challenge control-cocaine p=0.0008
		VLS Arc:
		ANOVA treatment p<0.0001, F 1,12 = 50.2
		Acute control-cocaine p=0.004
		Repeated control-cocaine p=0.05
		Challenge control-cocaine p=0.01
	WT mice: Nr4a1- Acute (0hr and 1h; n= 3 sections from 3 mice)	MS Nr4a1:
	WT mice: Nr4a1- Repeated (0hr and 1h; n=3 sections from 3 mice)	ANOVA treatment p<0.0001, F 1,12 = 47.8
	WT mice: Nr4a1- Challenge (0hr and 1h; n= 3 sections from 3 mice)	Acute control-cocaine p=0.12
		Repeated control-cocaine p=0.01
		Challenge control-cocaine p=0.002
		VLS Nr4a1:
		ANOVA treatment p=0.0002, F 1,12 = 26.6
		Acute control-cocaine p=0.02
		Repeated control-cocaine p=0.5
		Challenge control-cocaine p=0.05
Figure 2 – figure supplement 1 B		Two-way ANOVA followed by post-hoc Tukey's test (treatment - control/cocaine)
Puncta/cell	WT mice: Arc- Acute (0hr and 1h; n= 3 sections from 3 mice)	MS Arc:
	WT mice: Arc- Repeated (0hr and 1h; n= 3 sections from 3 mice)	ANOVA treatment p<0.0001, F 1,12 = 55.7
	WT mice: Arc- Challenge (0hr and 1h; n= 3 sections from 3 mice)	Acute control-cocaine p=0.03
		Repeated control-cocaine p=0.01
		Challenge control-cocaine p=0.002
		VLS Arc:
		ANOVA treatment p<0.0001, F 1,12 = 40.7
		Acute control-cocaine p=0.001
		Repeated control-cocaine p=0.09
		Challenge control-cocaine p=0.02
	WT mice: Nr4a1- Acute (0hr and 1h; n= 3 sections from 3 mice)	MS Nr4a1:
	WT mice: Nr4a1- Repeated (0hr and 1h; n=3 sections from 3 mice)	ANOVA treatment p<0.0001, F 1,12 = 50.5
	WT mice: Nr4a1- Challenge (0hr and 1h; n= 3 sections from 3 mice)	Acute control-cocaine p=0.09
		Repeated control-cocaine p=0.03
		Challenge control-cocaine p=0.001
		VLS Nr4a1:
		ANOVA treatment p=0.0001, F 1,12 = 29.1
		Acute control-cocaine p=0.02
		Repeated control-cocaine p=0.5
		Challenge control-cocaine p=0.03
Figure 2 – figure supplement 2 A		Linear model with Egr2 expression as the dependent variable and Arc, Nr4a1 expression as the independent variables
		Acute:
	WT mice: VLS- Egr2&Arc&Nr4a1 - Acute (0hr and 1h; n= 3 sections from 3 mice, #cells (0h)= 7985;#cells (1h)=6850	VLS control r2 = 0.43, p<0.0001
	WT mice: MS- Egr2&Arc&Nr4a1 - Acute (0hr and 1h; n= 3 sections from 3 mice, #cells (0h)= 15802;#cells (1h)=16125	VLS cocaine r2 = 0.72, p<0.0001
		MS control r2 = 0.66, p<0.0001
		MS cocaine r2 = 0.72, p<0.0001
		Repeated:
	WT mice: VLS- Egr2&Arc&Nr4a1 - Repeated (0hr and 1h; n= 3 sections from 3 mice, #cells (0h)= 10142;#cells (1h)=10287	VLS control r2 = 0.41, p<0.0001
	WT mice: MS- Egr2&Arc&Nr4a1 - Repeated (0hr and 1h; n= 3 sections from 3 mice, #cells (0h)= 15830;#cells (1h)=16758	VLS cocaine r2 =0.64, p<0.0001
		MS control r2 =0.49, p<0.0001
		MS cocaine r2 =0.66, p<0.0001
		Challenge:
	WT mice: VLS- Egr2&Arc&Nr4a1 - Challenge (0hr and 1h; n= 3 sections from 3 mice, #cells (0h)=9083;#cells (1h)=9495	VLS control r2 = 0.41, p<0.0001
	WT mice: MS- Egr2&Arc&Nr4a1 - Challenge (0hr and 1h; n= 3 sections from 3 mice, #cells (0h)= 15991;#cells (1h)=16952	VLS cocaine r2 = 0.72, p<0.0001
		MS control r2 = 0.45, p<0.0001
		MS cocaine r2 = 0.74, p<0.0001
Figure 2 – figure supplement 2 B		Pearson correlation
	WT mice: MS- Egr2&Fos - Acute (0hr and 1h; n= 6 sections from 3 mice, #cells (0h)= 31504;#cells (1h)=32829	Acute:
	WT mice: VLS- Egr2&Fos - Acute (0hr and 1h; n= 6 sections from 3 mice, #cells (0h)=21123;#cells (1h)=18043	MS control r=0.69 , p<0.0001
		MS cocaine r=0.74 , p<0.0001
		VLS control r=0.48 , p<0.0001
		VLS cocaine r=0.77 , p<0.0001
		Repeated:
	WT mice: VLS- Egr2&Fos - Repeated (0hr and 1h; n= 6 sections from 3 mice, #cells (0h)= 32042;#cells (1h)=33195	MS control r=0.51 , p<0.0001
	WT mice: MS- Egr2&Fos - Repeated (0hr and 1h; n= 6 sections from 3 mice, #cells (0h)= 20419;#cells (1h)=22095	MS cocaine r=0.64 , p<0.0001
		VLS control r=0.32 , p<0.0001
		VLS cocaine r=0.53 , p<0.0001
		Challenge:
	WT mice: VLS- Egr2&Fos - Challenge (0hr and 1h; n= 6 sections from 3 mice, #cells (0h)= 32664;#cells (1h)=32334	MS control r=0.54 , p<0.0001
	WT mice: MS- Egr2&Fos - Challenge (0hr and 1h; n= 6 sections from 3 mice, #cells (0h)= 19205;#cells (1h)=17734	MS cocaine r=0.76 , p<0.0001
		VLS control r=0.46 , p<0.0001
		VLS cocaine r=0.70 , p<0.0001
Figure 3 – figure supplement 1 A
Egr2 MS		Acute:
		Egr2-D1, control, slope = 0.09, r2 = 0.069, p < 0.0001
		Egr2-D1, cocaine, slope = 0.41, r2 = 0.24, p < 0.0001
		Egr2-D2, control, slope = 0.08, r2 = 0.05, p < 0.0001
		Egr2-D2, cocaine, slope = 0.19, r2 = 0.052, p < 0.0001
		Repeated
		Egr2-D1, control, slope = 0.04, r2 = 0.03, p < 0.0001
		Egr2-D1, cocaine, slope = 0.19, r2 = 0.1, p < 0.0001
		Egr2-D2, control, slope = 0.06, r2 = 0.09, p < 0.0001
		Egr2-D2, cocaine, slope = 0.19, r2 = 0.10, p < 0.0001
		Challenge:
		Egr2-D1, control, slope = 0.05, r2 = 0.045, p < 0.0001
		Egr2-D1, cocaine, slope = 0.42, r2 = 0.2, p < 0.0001
		Egr2-D2, control, slope = 0.07, r2 = 0.076, p < 0.0001
		Egr2-D2, cocaine, slope = 0.18, r2 = 0.046, p < 0.0001
Figure 3 – figure supplement 1 B
Fos VLS		VLS:
		Acute:
		Fos-D1, control, slope = 0.03, r2 = 0.02, p < 0.0001
		Fos-D1, cocaine, slope = 0.33, r2 = 0.32, p < 0.0001
		Fos-D2, control, slope = 0.03, r2 = 0.02, p < 0.0001
		Fos-D2, cocaine, slope = -0.03, r2 = 0, p < 0.0001
		Repeated
		Fos-D1, control, slope = 0.02, r2 = 0.03, p < 0.0001
		Fos-D1, cocaine, slope = 0.09, r2 = 0.06, p < 0.0001
		Fos-D2, control, slope = 0.02, r2 = 0.02, p < 0.0001
		Fos-D2, cocaine, slope = 0.02, r2 = 0, p < 0.0001
		Challenge:
		Fos-D1, control, slope = 0.05, r2 = 0.07, p < 0.0001
		Fos-D1, cocaine, slope = 0.42, r2 = 0.2, p < 0.0001
		Fos-D2, control, slope = 0.03, r2 = 0.05, p < 0.0001
		Fos-D2, cocaine, slope = -0.03, r2 = 0, p < 0.0001
Fos MS		MS:
		Acute:
		Fos-D1, control, slope = 0.09, r2 = 0.03, p < 0.0001
		Fos-D1, cocaine, slope = 0.23, r2 = 0.11, p < 0.0001
		Fos-D2, control, slope = 0.08, r2 = 0.03, p < 0.0001
		Fos-D2, cocaine, slope = 0.12, r2 = 0.03, p < 0.0001
		Repeated
		Fos-D1, control, slope = 0.03, r2 = 0.02, p < 0.0001
		Fos-D1, cocaine, slope = 0.16, r2 = 0.08, p < 0.0001
		Fos-D2, control, slope = 0.04, r2 = 0.04, p < 0.0001
		Fos-D2, cocaine, slope = 0.09, r2 = 0.03, p < 0.0001
		Challenge:
		Fos-D1, control, slope = 0.04, r2 = 0.03, p < 0.0001
		Fos-D1, cocaine, slope = 0.26, r2 = 0.13, p < 0.0001
		Fos-D2, control, slope = 0.04, r2 = 0.04, p < 0.0001
		Fos-D2, cocaine, slope = 0.12, r2 = 0.03, p < 0.0001
Figure 3 – figure supplement 2 A		Two-way ANOVA (treatment - control/cocaine and experiment - acute, repeated, challenge)
Fraction	WT mice: VLS: Drd1- Acute: 0hr and 1h; n= 6 sections from 3 mice	MS:
	WT mice: VLS: Drd1- Repeated: 0hr and 1h; n= 6 sections from 3 mice	Drd1 treatment p = 0.03, F 1,30 = 5.2
	WT mice: VLS: Drd1- Challenge: 0hr and 1h; n= 6 sections from 3 mice	Drd1 experiment p = 0.35, F 2,30 = 1.1
		Drd2 treatment p = 0.35, F 1,30 = 1.08
	WT mice: MS: Drd2- Acute: 0hr and 1h; n= 6 sections from 3 mice	Drd2 experiment p = 0.007, F 2,30 = 7.06
	WT mice: MS: Drd2- Repeated: 0hr and 1h; n= 6 sections from 3 mice	VLS:
	WT mice: MS: Drd2- Challenge: 0hr and 1h; n= 6 sections from 3 mice	Drd1 treatment p = 0.3, F1,2 = 1.02
		Drd1 experiment p = 0.6, F 2,30 = 0.4
		Drd2 treatment p =0.5, F 1,30 = 0.57
		Drd2 experiment p = 0.02, F 2,30 = 5.5
Figure 3 – figure supplement 2 B		Two-way ANOVA (treatment - control/cocaine and experiment - acute, repeated, challenge)
Puncta/cell	WT mice: VLS: Drd1- Acute: 0hr and 1h; n= 6 sections from 3 mice	MS:
	WT mice: VLS: Drd1- Repeated: 0hr and 1h; n= 6 sections from 3 mice	Drd1 treatment p = 0.3, F1,30 = 1.1
	WT mice: VLS: Drd1- Challenge: 0hr and 1h; n= 6 sections from 3 mice	Drd1 experiment p = 0.02, F 2,30 = 4.4
		Drd2 treatment p = 0.8, F1,30 =0.056
	WT mice: MS: Drd2- Acute: 0hr and 1h; n= 6 sections from 3 mice	Drd2 experiment p = 0.0003, F 2,30 = 14.8
	WT mice: MS: Drd2- Repeated: 0hr and 1h; n= 6 sections from 3 mice	VLS:
	WT mice: MS: Drd2- Challenge: 0hr and 1h; n= 6 sections from 3 mice	Drd1 treatment p = 0.6, F 1,30 = 0.2
		Drd1 experiment p = 0.2, F 2,30 = 1.5
		Drd2 treatment p = 0.75, F 1,30 = 0.14
		Drd2 experiment p = 0.003, F 2,30 = 9.7
Figure 3– figure supplement 3 C		Mixed effects model including mouse as random effect as well as fixed effects: group (mcherry or hM4Di), the day of experiment, and the interaction group with day
	Egr2-CreDIO-mcherry/CNO ;n = 7	ANOVA:
	Egr2-CreDIO-hM4Di/CNO ;n = 7	Group p=0.8, F 1,12 = 0.07
		Day p<0.0001, F 4,48 = 11.7
		Group:Day p = 0.93, , F 4,48 = 0.19
Figure 3 – figure supplement 4 C		Mixed effects model including mouse as random effect as well as fixed effects: group (GFP or DNEgr2), the day of experiment, and the interaction group with day
	WTGFP ;n = 8	ANOVA:
	WTDNEgr2 ;n = 8	Group p=0.2, F 1,12 = 1.7
		Day p<0.0001, F 4,48 = 26.9
		Group:Day p = 0.7, F 4,56 = 0.54
Figure 3 – figure supplement 4 D		Two-tailed unpaired t-test
VLS	WTGFP ;n = 3	Arc WTGFP vs. WTDNEgr2 p=0.01, t = 6, df = 2.8
	WTDNEgr2 ;n = 3	Nr4a1 WTGFP vs. WTDNEgr2 p=0.004, t = 6.2, df = 3.8
		Egr2 WTGFP vs. WTDNEgr2 p=0.03, t = -5.36, df = 2
Figure 3 – figure supplement 4 E		Two-tailed unpaired t-test
MS	WTGFP ;n = 3	Arc WTGFP vs. WTDNEgr2 p=0.24, t = 1.37, df = 3.98
	WTDNEgr2 ;n = 3	Nr4a1 WTGFP vs. WTDNEgr2 p=0.07, t = 2.46, df = 3.99
		Egr2 WTGFP vs. WTDNEgr2 p=0.87, t = -0.17, df = 2.96
Figure 3 – figure supplement 4 F		Two-tailed unpaired t-test
LCtx	WTGFP ;n = 3	Nr4a1 WTGFP vs. WTEgr2 p=0.14, t = 1.8, df = 3.3
	WTDNEgr2 ;n = 3	Arc WTGFP vs. WTEgr2 p=0.22, t = 1.4, df = 3.7
		Egr2 WTGFP vs. WTEgr2 p=0.43, t = -0.9, df = 3.24
Figure 3 – figure supplement 4 G		Two-tailed unpaired t-test
NAc	WTGFP ;n = 3	Nr4a1 WTGFP vs. WTEgr2 p=0.24, t = 1.4, df = 3.4
	WTDNEgr2 ;n = 3	Arc WTGFP vs. WTEgr2 p=0.46, t = 0.82, df = 3.52
		Egr2 WTGFP vs. WTEgr2 p=0.15, t = -2.2, df = 2.05
