# Supplementary material for: Egr2 induction in spiny projection neurons of the ventrolateral striatum contributes to cocaine place preference in mice
Source: eLife. 2021 Mar 16;10:e65228. doi: 10.7554/eLife.65228 (PMC8057818; doi:10.7554/eLife.65228)
Supplement: Supplementary file 7. [file elife-65228-supp7.xlsx]

## Sheet: number_cells_smFISH
Supplementary Table S7: Distribution of cell numbers among replicates in smFISH analysis
experiment	combination	condition	rep_num	number_cells
Acute	Egr2_Arc_Nr4a1	0h	1	9339
Acute	Egr2_Arc_Nr4a1	0h	2	10764
Acute	Egr2_Arc_Nr4a1	0h	3	9999
Acute	Egr2_Arc_Nr4a1	1h	1	9077
Acute	Egr2_Arc_Nr4a1	1h	2	11082
Acute	Egr2_Arc_Nr4a1	1h	3	9490
Acute	Egr2_D1_Fos	0h	1	9705
Acute	Egr2_D1_Fos	0h	2	10304
Acute	Egr2_D1_Fos	0h	3	9795
Acute	Egr2_D1_Fos	1h	1	10856
Acute	Egr2_D1_Fos	1h	2	11173
Acute	Egr2_D1_Fos	1h	3	10201
Acute	Egr2_D2_D1	0h	1	9191
Acute	Egr2_D2_D1	0h	2	9440
Acute	Egr2_D2_D1	0h	3	10207
Acute	Egr2_D2_D1	1h	1	9090
Acute	Egr2_D2_D1	1h	2	11187
Acute	Egr2_D2_D1	1h	3	8984
Acute	Egr2_D2_Fos	0h	1	10732
Acute	Egr2_D2_Fos	0h	2	11240
Acute	Egr2_D2_Fos	0h	3	9643
Acute	Egr2_D2_Fos	1h	1	9388
Acute	Egr2_D2_Fos	1h	2	12066
Acute	Egr2_D2_Fos	1h	3	9601
Repeated	Egr2_Arc_Nr4a1	0h	1	10024
Repeated	Egr2_Arc_Nr4a1	0h	2	10534
Repeated	Egr2_Arc_Nr4a1	0h	3	10995
Repeated	Egr2_Arc_Nr4a1	1h	1	10087
Repeated	Egr2_Arc_Nr4a1	1h	2	12246
Repeated	Egr2_Arc_Nr4a1	1h	3	11835
Repeated	Egr2_D1_Fos	0h	1	10145
Repeated	Egr2_D1_Fos	0h	2	10488
Repeated	Egr2_D1_Fos	0h	3	11271
Repeated	Egr2_D1_Fos	1h	1	11445
Repeated	Egr2_D1_Fos	1h	2	11179
Repeated	Egr2_D1_Fos	1h	3	10257
Repeated	Egr2_D2_D1	0h	1	10611
Repeated	Egr2_D2_D1	0h	2	10579
Repeated	Egr2_D2_D1	0h	3	11576
Repeated	Egr2_D2_D1	1h	1	11118
Repeated	Egr2_D2_D1	1h	2	11099
Repeated	Egr2_D2_D1	1h	3	12336
Repeated	Egr2_D2_Fos	0h	1	10741
Repeated	Egr2_D2_Fos	0h	2	10481
Repeated	Egr2_D2_Fos	0h	3	11117
Repeated	Egr2_D2_Fos	1h	1	11800
Repeated	Egr2_D2_Fos	1h	2	11280
Repeated	Egr2_D2_Fos	1h	3	12222
Challenge	Egr2_Arc_Nr4a1	0h	1	10131
Challenge	Egr2_Arc_Nr4a1	0h	2	8823
Challenge	Egr2_Arc_Nr4a1	0h	3	11343
Challenge	Egr2_Arc_Nr4a1	1h	1	11099
Challenge	Egr2_Arc_Nr4a1	1h	2	10614
Challenge	Egr2_Arc_Nr4a1	1h	3	10650
Challenge	Egr2_D1_Fos	0h	1	11670
Challenge	Egr2_D1_Fos	0h	2	10306
Challenge	Egr2_D1_Fos	0h	3	9900
Challenge	Egr2_D1_Fos	1h	1	11718
Challenge	Egr2_D1_Fos	1h	2	9260
Challenge	Egr2_D1_Fos	1h	3	10142
Challenge	Egr2_D2_D1	0h	1	13217
Challenge	Egr2_D2_D1	0h	2	9592
Challenge	Egr2_D2_D1	0h	3	10332
Challenge	Egr2_D2_D1	1h	1	11352
Challenge	Egr2_D2_D1	1h	2	10426
Challenge	Egr2_D2_D1	1h	3	10521
Challenge	Egr2_D2_Fos	0h	1	10505
Challenge	Egr2_D2_Fos	0h	2	10074
Challenge	Egr2_D2_Fos	0h	3	10112
Challenge	Egr2_D2_Fos	1h	1	10720
Challenge	Egr2_D2_Fos	1h	2	9797
Challenge	Egr2_D2_Fos	1h	3	9227
