# Supplementary figures and images for: Egr2 induction in spiny projection neurons of the ventrolateral striatum contributes to cocaine place preference in mice
Source: eLife journal article supplement (doi:10.7554/elife.65228), 2021-03-16

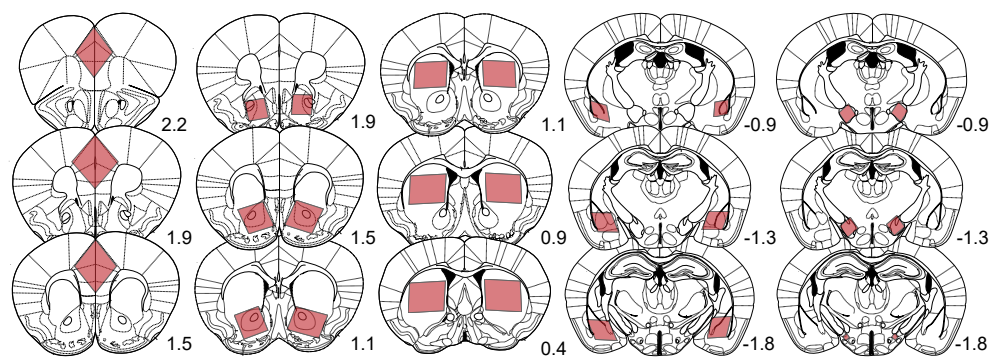

Supplement: supp [file elife_poa_e65228_Figure_1_figure_supplement_1.pdf › elife_poa_e65228_Figure_1_figure_supplement_1.pdf]

**A**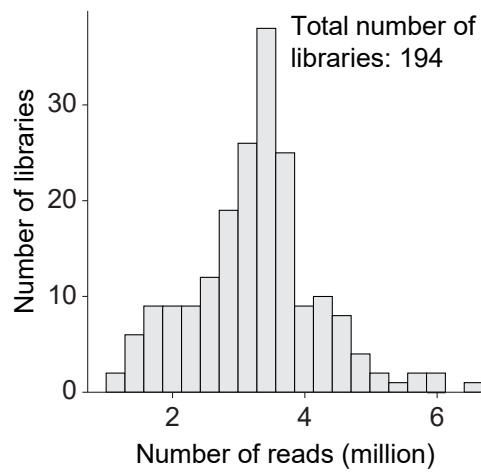**B**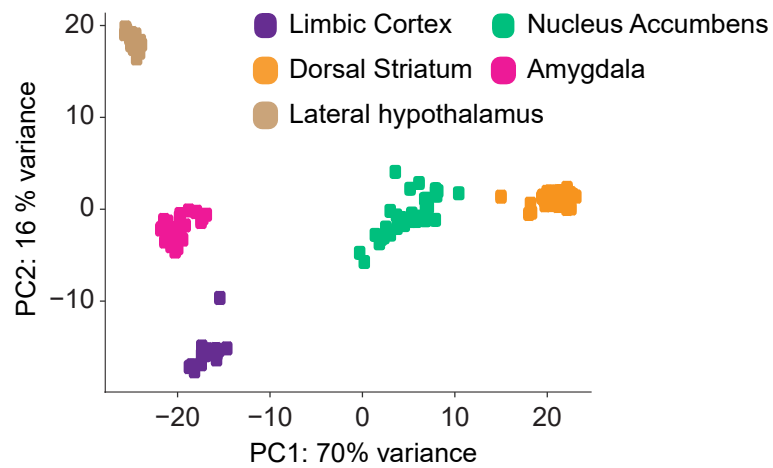**C**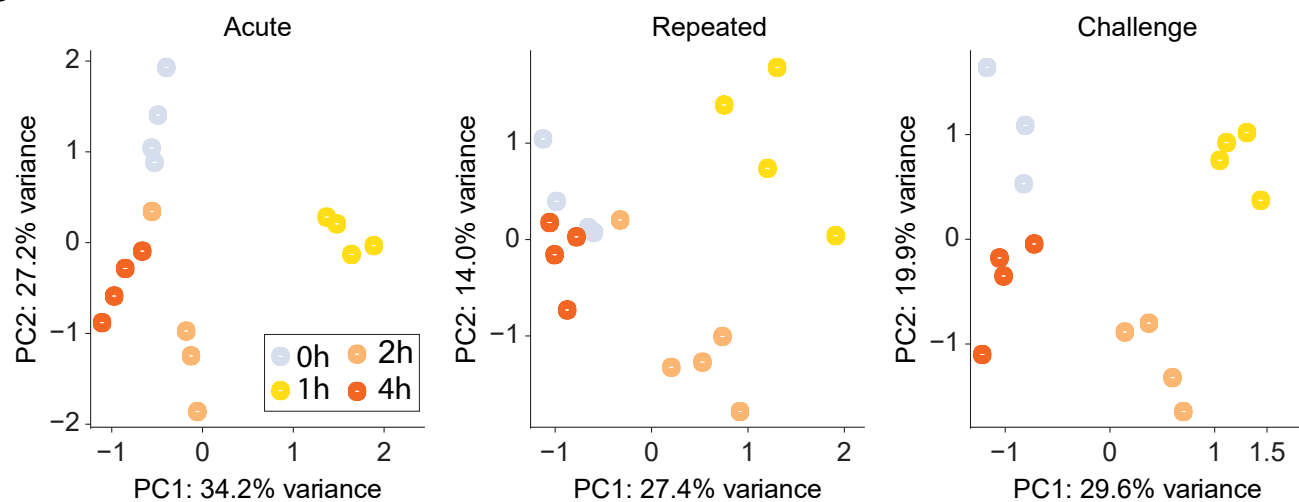

Supplement: supp [file elife_poa_e65228_Figure_1_figure_supplement_2.pdf › elife_poa_e65228_Figure_1_figure_supplement_2.pdf]

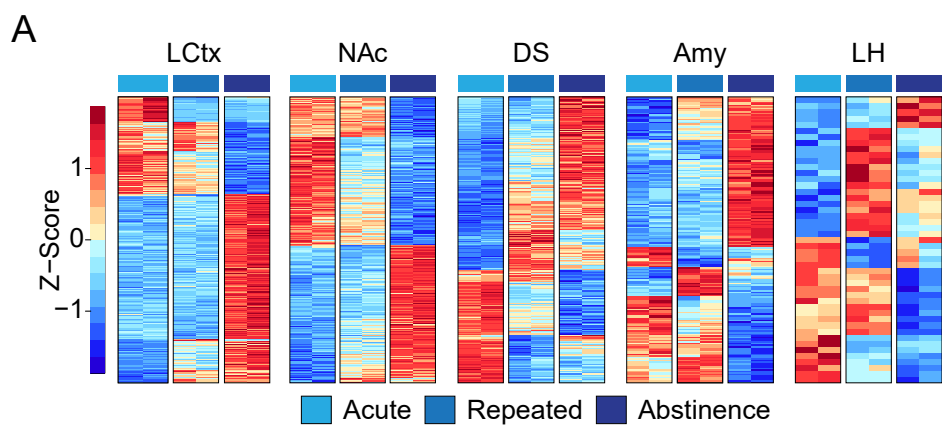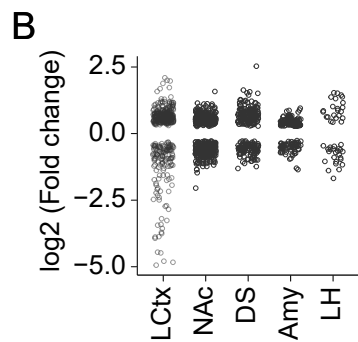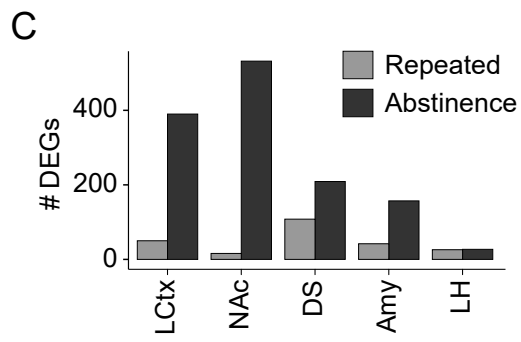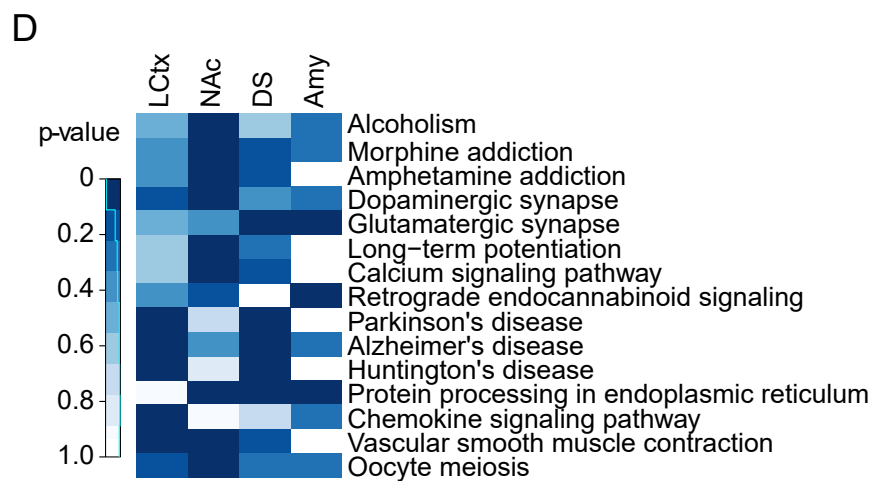

Supplement: supp [file elife_poa_e65228_Figure_1_figure_supplement_3.pdf › elife_poa_e65228_Figure_1_figure_supplement_3.pdf]

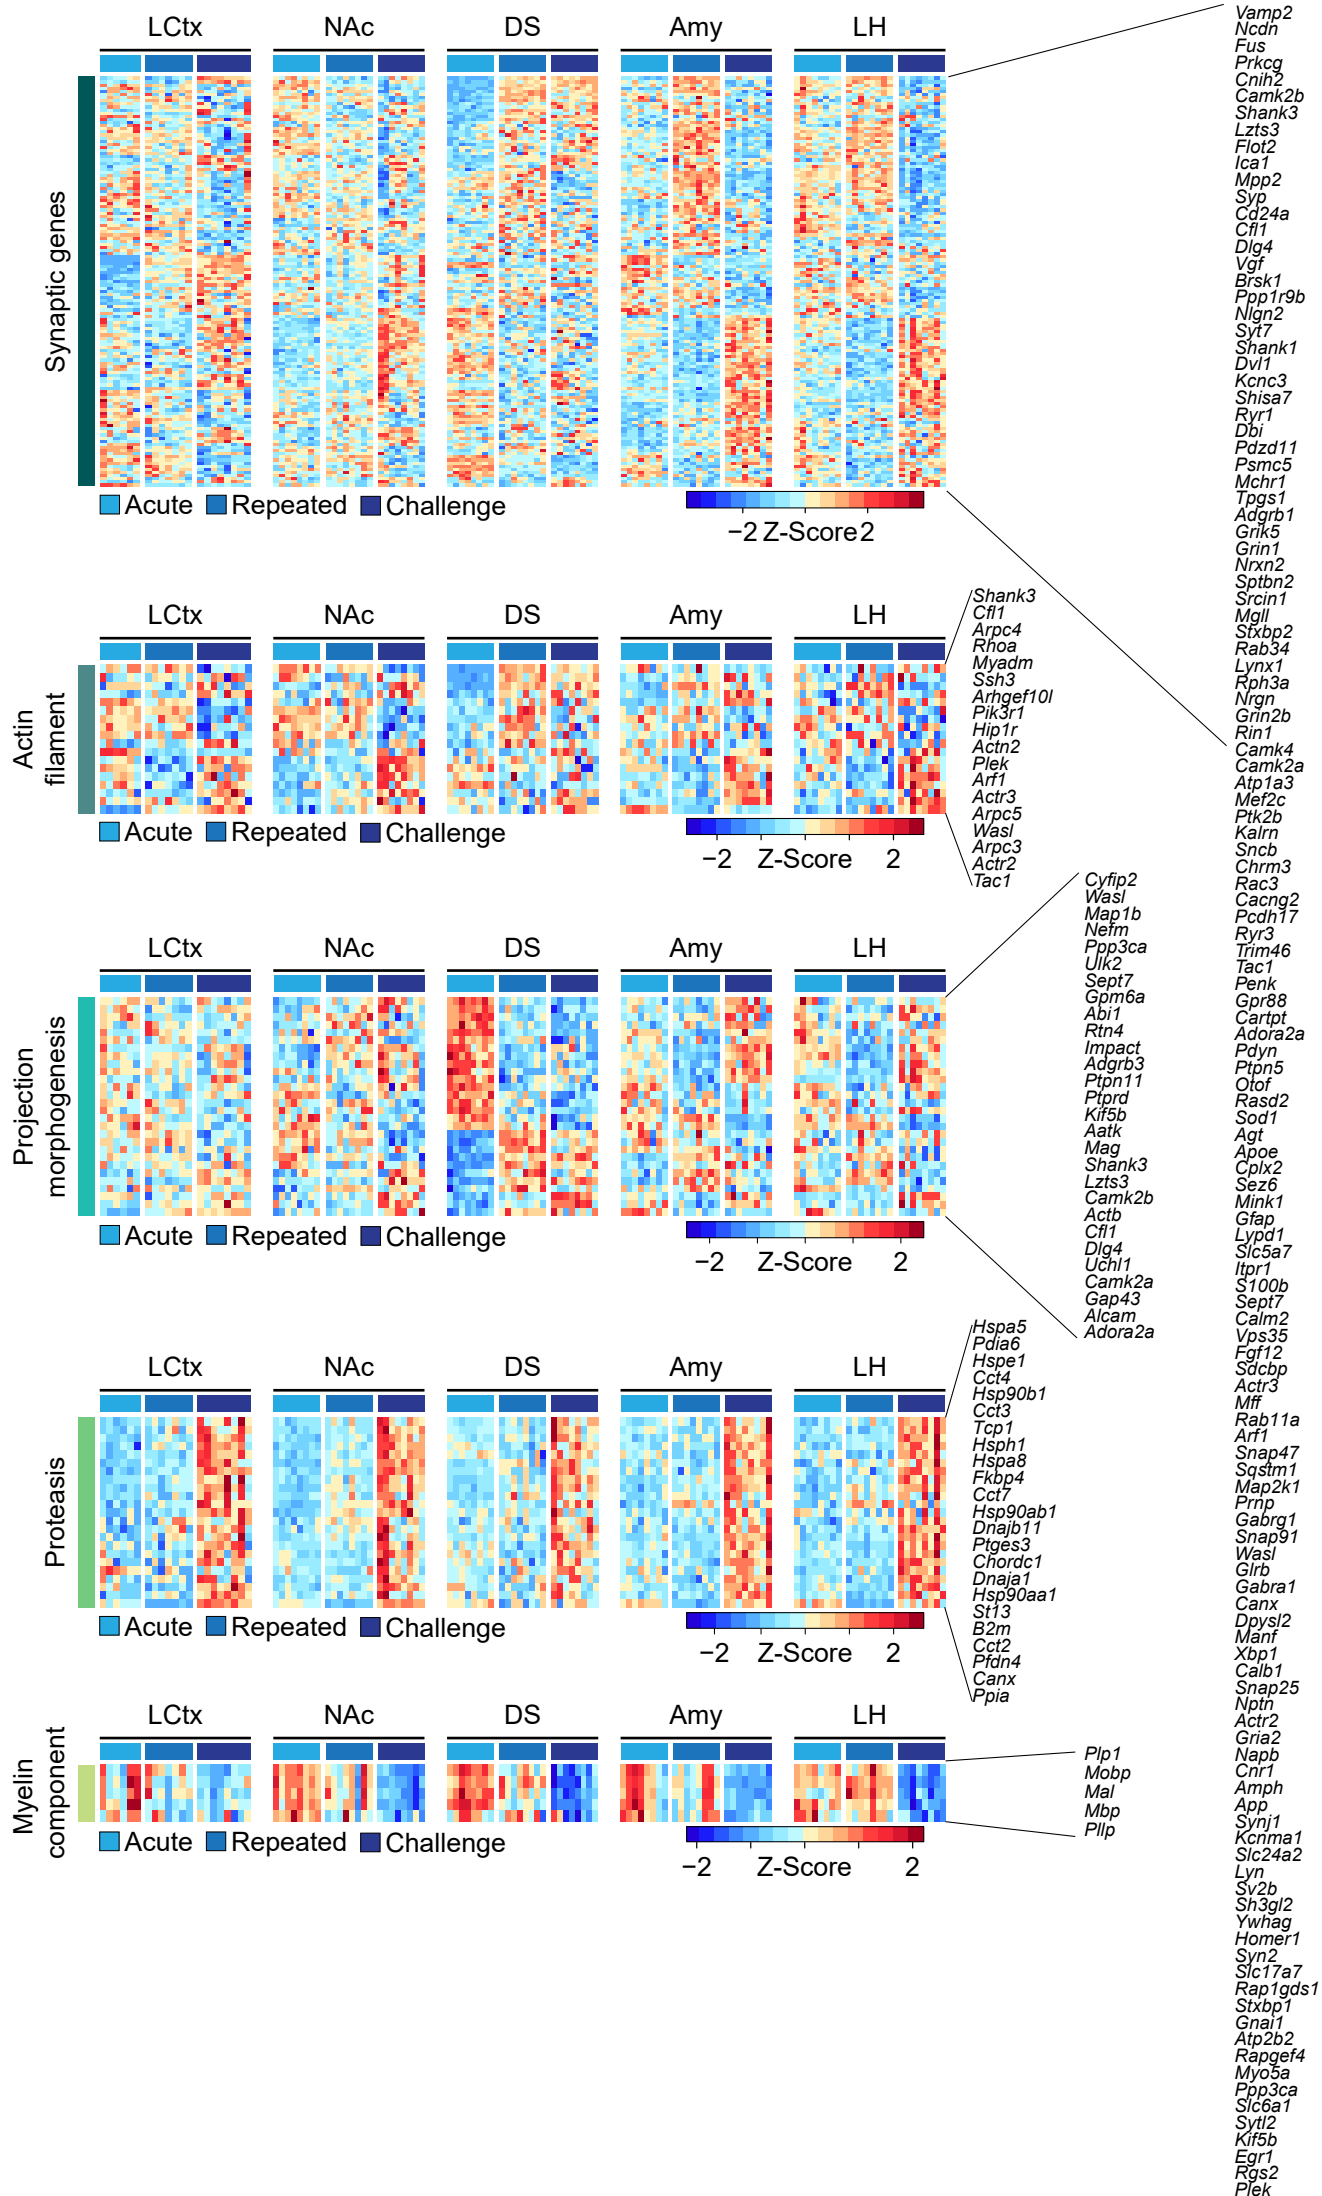

Supplement: supp [file elife_poa_e65228_Figure_1_figure_supplement_4.pdf › elife_poa_e65228_Figure_1_figure_supplement_4.pdf]

A

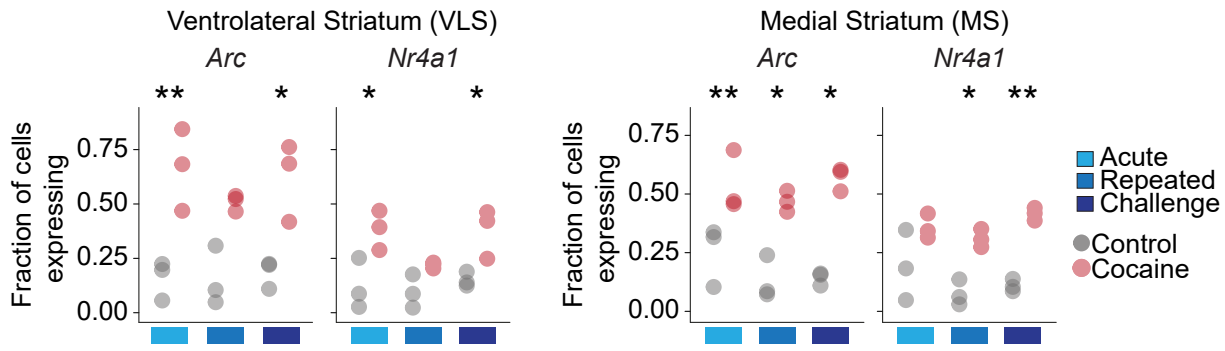

B

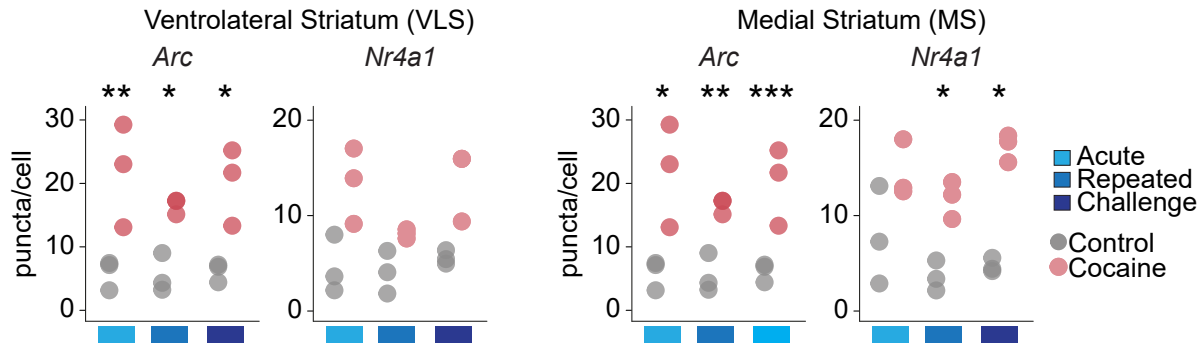

Supplement: supp [file elife_poa_e65228_Figure_2_figure_supplement_1.pdf › elife_poa_e65228_Figure_2_figure_supplement_1.pdf]

A

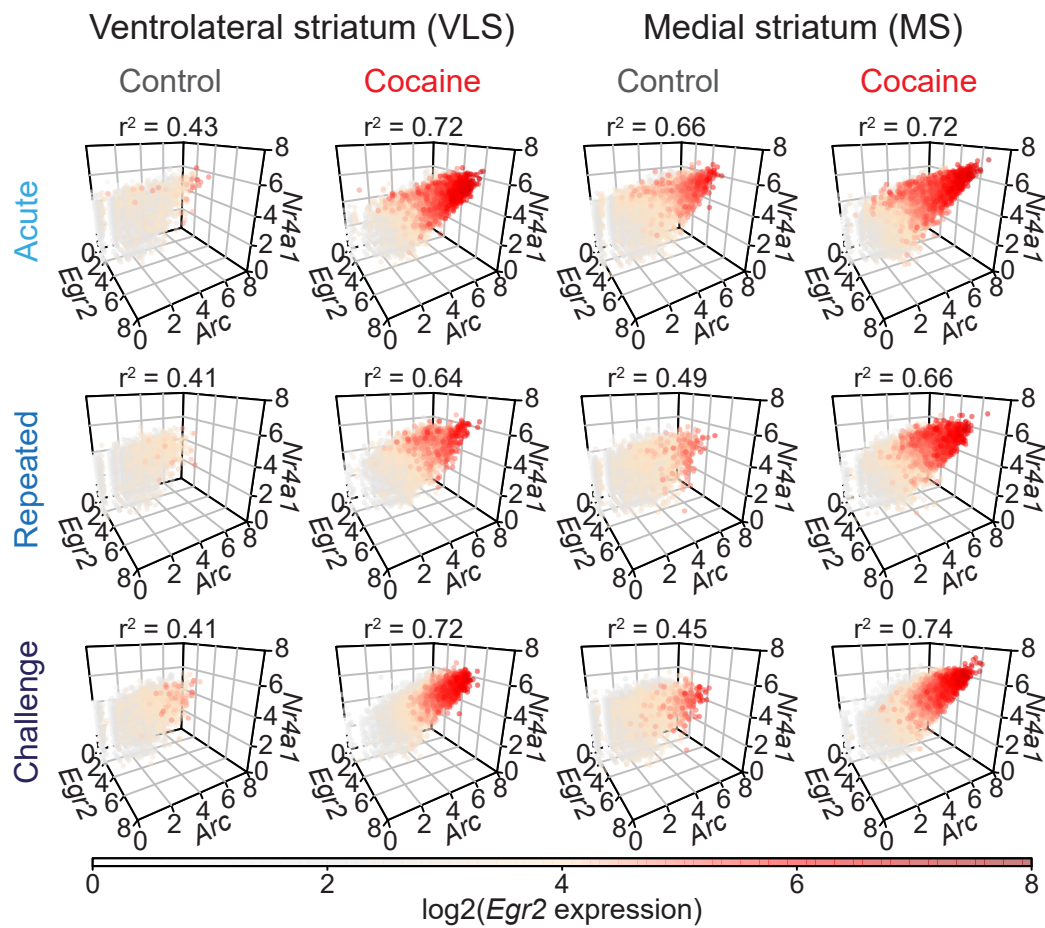

B

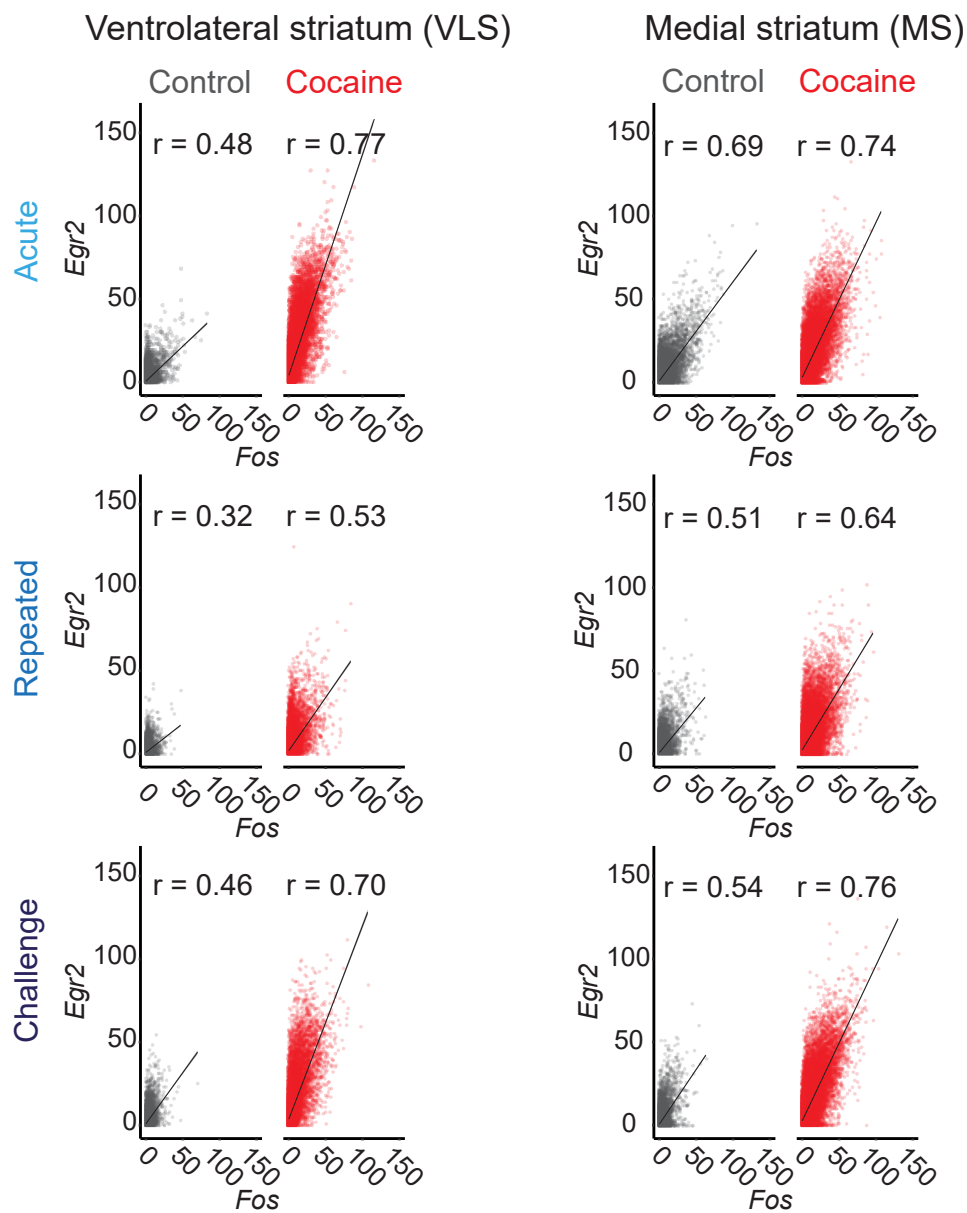

Supplement: supp [file elife_poa_e65228_Figure_2_figure_supplement_2.pdf › elife_poa_e65228_Figure_2_figure_supplement_2.pdf]

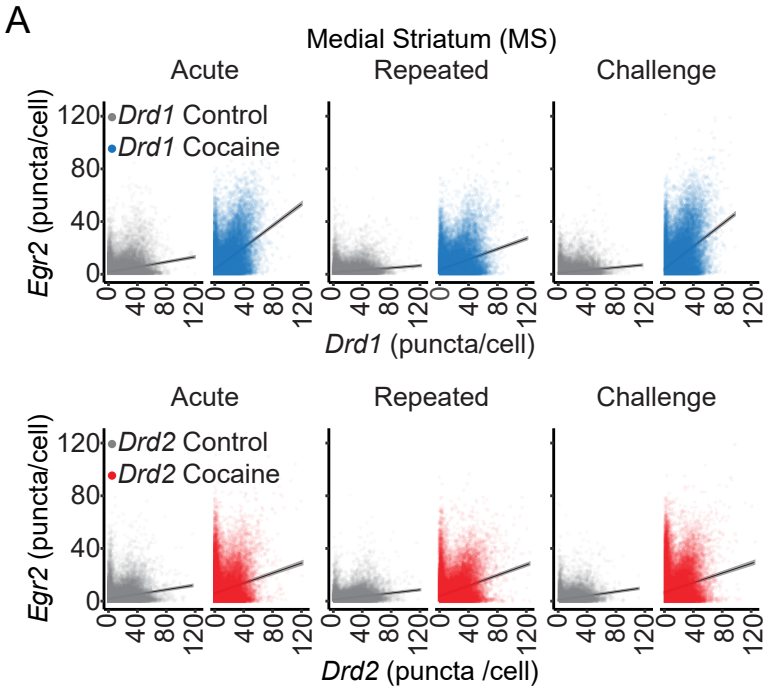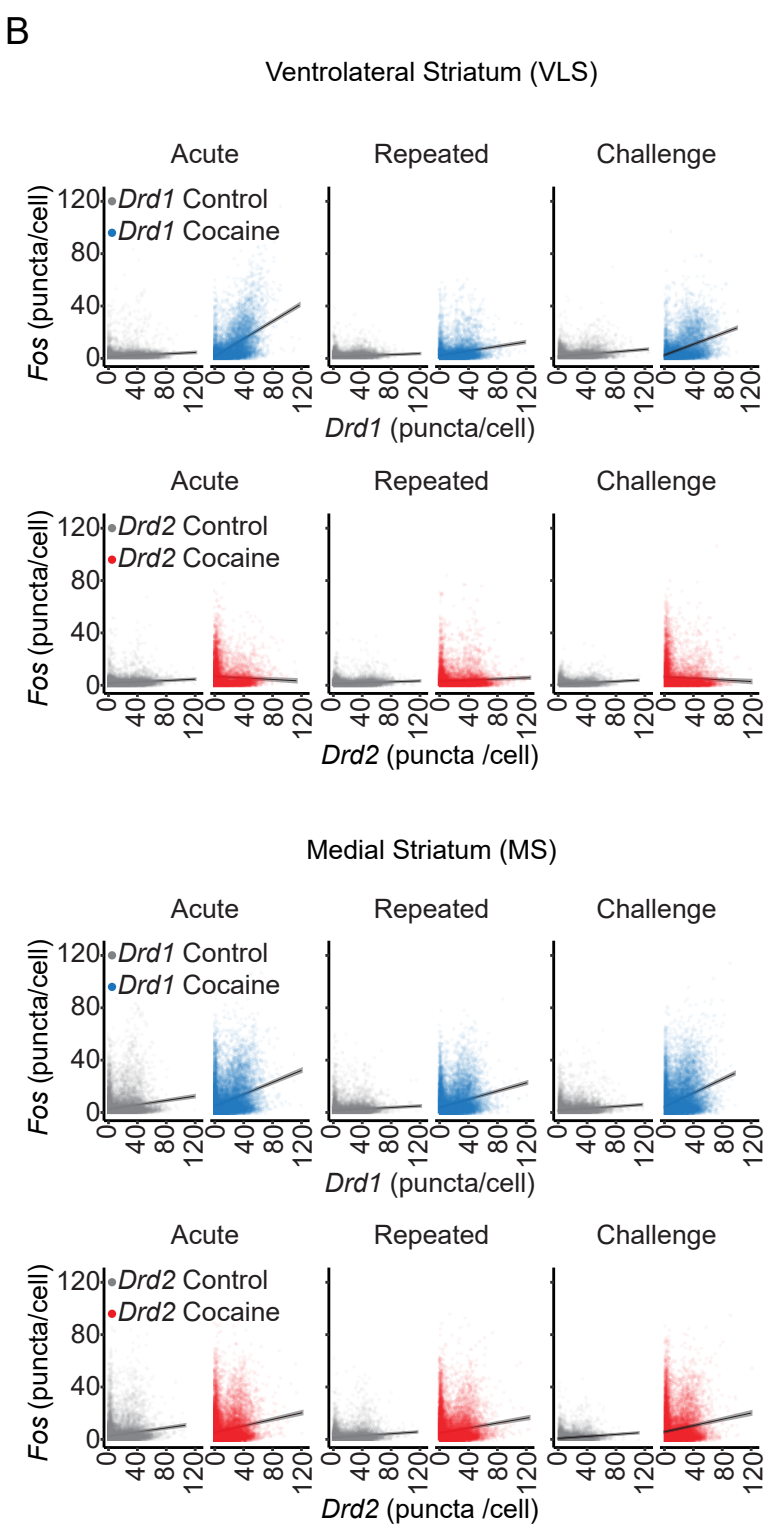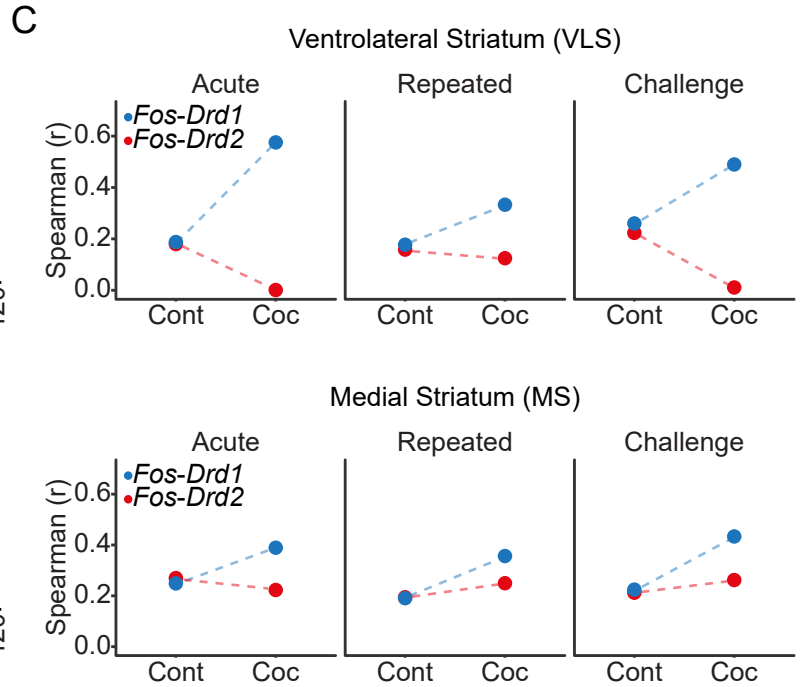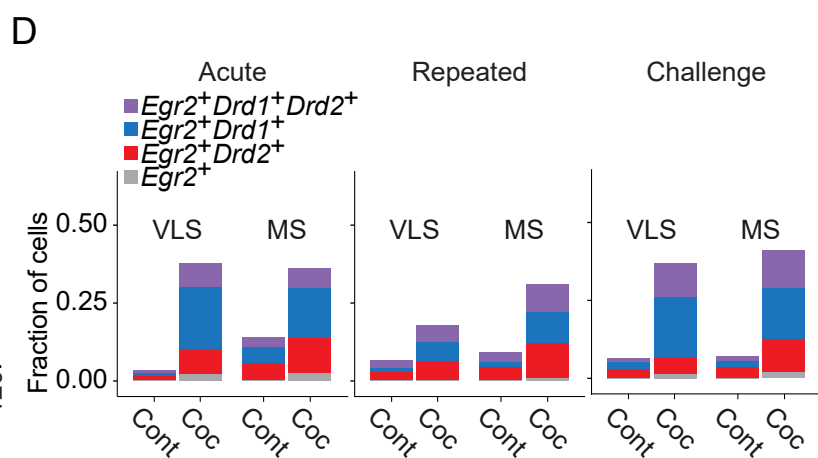

Supplement: supp [file elife_poa_e65228_Figure_3_figure_supplement_1.pdf › elife_poa_e65228_Figure_3_figure_supplement_1.pdf]

A

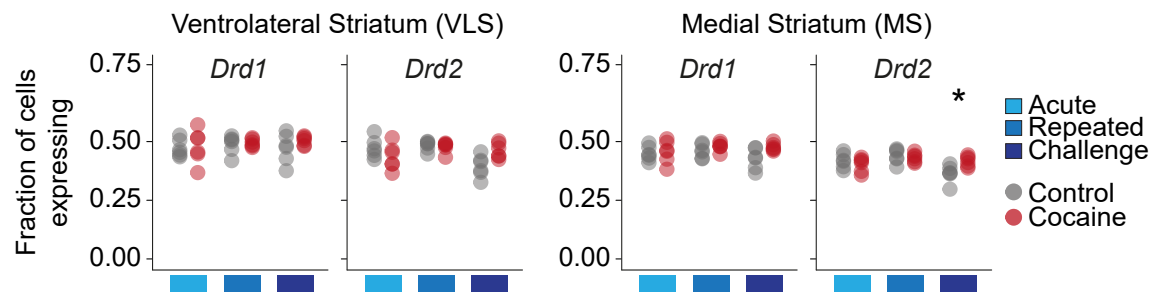

B

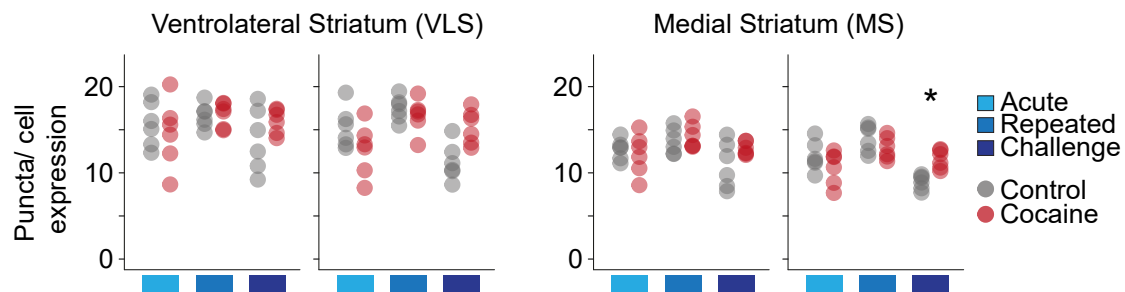

Supplement: supp [file elife_poa_e65228_Figure_3_figure_supplement_2.pdf › elife_poa_e65228_Figure_3_figure_supplement_2.pdf]

A

AAV-DIO-hM4Di-mCherry

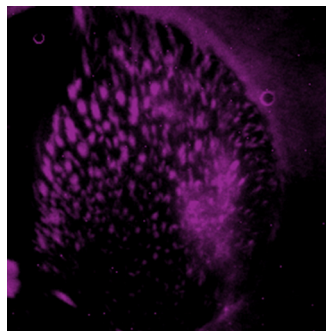

Bregma ~0.4

B

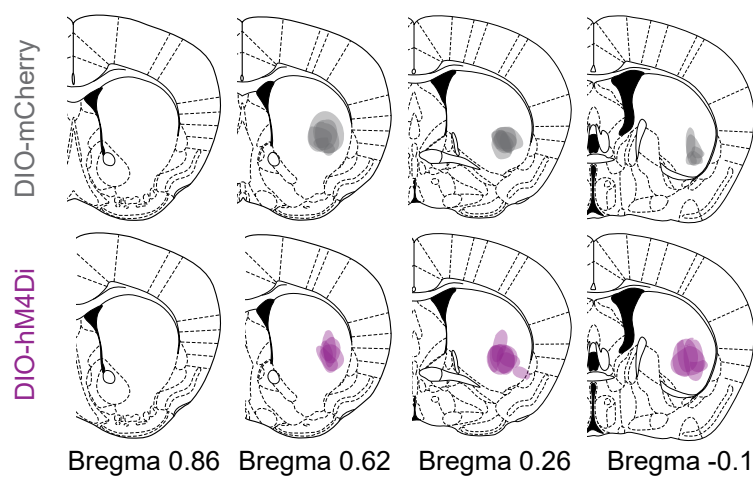

Bregma 0.86 Bregma 0.62 Bregma 0.26 Bregma -0.1

C

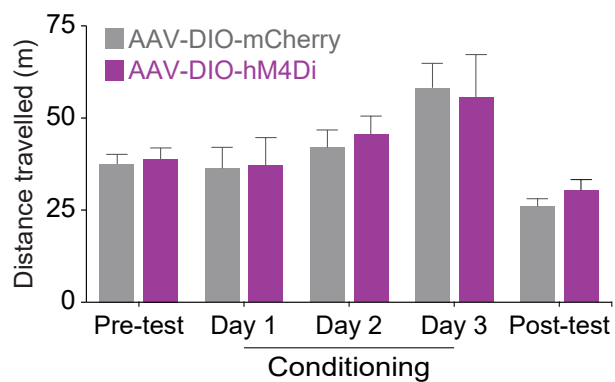

Supplement: supp [file elife_poa_e65228_Figure_3_figure_supplement_3.pdf › elife_poa_e65228_Figure_3_figure_supplement_3.pdf]

A

AAV-DNEgr2

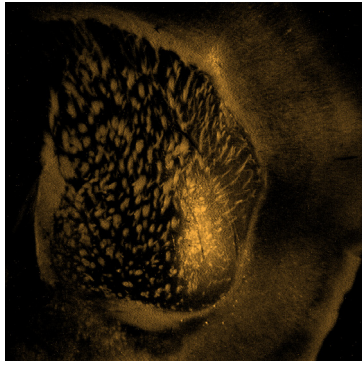Bregma  $\sim -0.1$ 

B

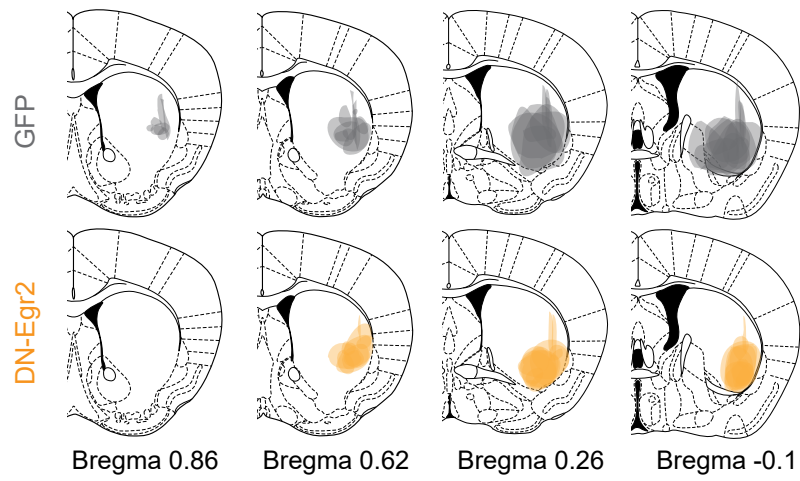

C

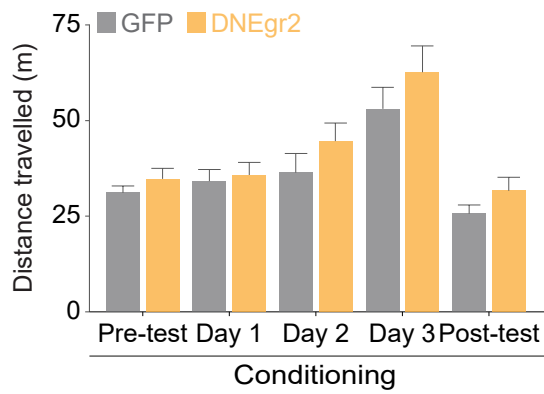

D

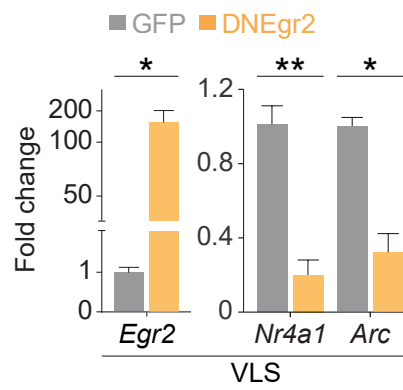

E

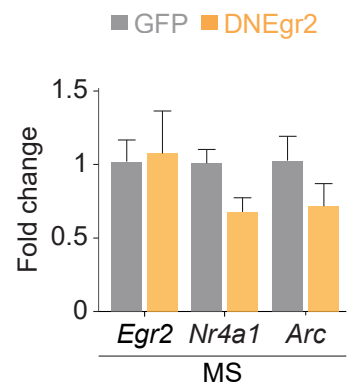

F

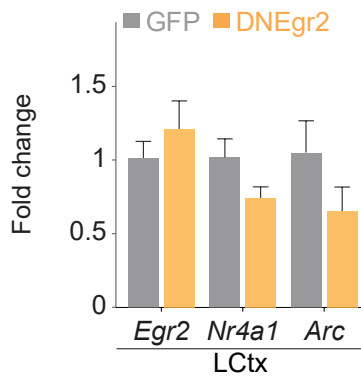

G

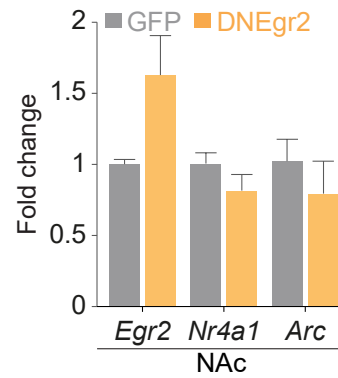

Supplement: supp [file elife_poa_e65228_Figure_3_figure_supplement_4.pdf › elife_poa_e65228_Figure_3_figure_supplement_4.pdf]
